# Supplementary material for: Stability of Imprinting and Differentiation Capacity in Naïve Human Cells Induced by Chemical Inhibition of CDK8 and CDK19
Source: Preprints.org preprint supplement (doi:10.20944/preprints202103.0517.v1), 2021-03-22
Supplement: Supplementary file 1 [file supplementary]

## Sheet: legend
Supplementary Table 3: RNA-seq analysis in long-term human PSCs adapted to culture in Primed or CDK8/19i conditions.
Sheet#2: Gene expression (FPKM; base mean is expression in the control primed condition) and Log2 fold-change detected by RNAseq in human PSCs adapted to primed or CDK8/19i conditions. Data shown represents the control Primed condition versus CDK8/19i conditions (see Methods for culture details) in five cell lines (D2#2, D2#4, H1, CB5 and WIBR3). List of all differentially expressed genes (DEG) w…

## Sheet: long-term DEG
entrez	baseMean	log2FoldChange	lfcSE	stat	pvalue	padj	external_gene_name	Shrunklog2FoldChange
1087	2.51586	-4.06944	2.36664	-1.7195	0.0855232		CEACAM7	-0.125155
164127	3.44382	3.97307	1.86357	2.13197	0.0330096		C1orf65	0.158356
100505738	24.1109	-3.83542	1.10497	-3.47106	0.00051841	0.0275643	MIR4458HG	-0.582047
128826	33.2654	3.58631	0.601112	5.96612	2.42957e-09	1.85553e-06	C20orf166	1.36185
8521	1.86769	-3.5715	2.03102	-1.75848	0.0786664		GCM1	-0.14922
414157	1.09098	-3.45995	2.76135	-1.25299	0.210209		C10orf62	-0.0843422
442425	207.749	3.41538	0.567809	6.01502	1.79868e-09	1.43911e-06	FOXB2	1.38594
946	2.95106	-3.4146	2.60135	-1.31262	0.18931		SIGLEC6	-0.103221
100505585	2.08979	-3.28418	2.69005	-1.22086	0.222138		ARHGEF1	-0.0719276
253868	342.483	3.22151	0.737455	4.36841	1.25153e-05	0.0018609	C20orf166-AS1	0.834916
7038	1.80725	-3.19416	2.12415	-1.50373	0.13265		TG	-0.115833
6280	1.13786	-3.18613	3.07505	-1.03612	0.300145		S100A9	-0.0683717
23547	1.27015	-3.16034	3.04715	-1.03715	0.299668		LILRA4	-0.0703129
5459	1.64667	-3.14299	2.12193	-1.4812	0.138554		POU4F3	-0.112217
343035	11.7508	-3.13867	1.02616	-3.05866	0.00222327	0.067919	RD3	-0.463377
222611	2.70705	-3.13858	1.8078	-1.73614	0.0825399		GPR111	-0.139544
644139	1.30773	-3.12899	2.68164	-1.16682	0.243284		PIRT	-0.0595293
400643	8.22669	-3.121	1.26905	-2.45932	0.0139199		LINC00668	-0.383103
51284	3.40044	-3.09933	1.88306	-1.6459	0.0997853		TLR7	-0.102776
7783	1.86756	-3.08862	1.89285	-1.63173	0.102737		ZP2	-0.149423
442918	5.3676	3.08222	1.61701	1.90612	0.0566347		MIR373	0.242794
222487	51.8439	-3.03773	0.827696	-3.67011	0.000242447	0.0163576	GPR97	-0.450327
3046	1.36683	-3.01317	2.66988	-1.12858	0.259074		HBE1	-0.0665119
285954	2.56572	2.98726	2.05237	1.45552	0.145526		INHBA-AS1	0.0873861
29958	20.7391	-2.98431	1.30962	-2.27876	0.0226811	0.270209	DMGDH	-0.258337
641518	0.969402	2.95561	3.0815	0.959146	0.337485		LEF1-AS1	0.0672556
90586	4.3362	-2.9428	1.5032	-1.95769	0.0502659		AOC4P	-0.153347
5288	1.24431	2.93742	2.36585	1.24159	0.214388		PIK3C2G	0.0976324
2705	1.98073	2.93721	1.87424	1.56715	0.11708		GJB1	0.133942
915	2.90879	-2.93413	2.34303	-1.25228	0.210468		CD3D	-0.11786
5458	2.79159	2.93046	1.68077	1.74352	0.0812425		POU4F2	0.156229
100505879	37.0584	-2.91771	0.65974	-4.42251	9.75587e-06	0.00151776	KIF25-AS1	-0.863729
5995	1.16482	2.89676	2.77249	1.04483	0.296104		RGR	0.0526583
2255	6.36029	2.89593	1.02291	2.83107	0.00463926		FGF10	0.500423
84690	2.24186	2.88719	1.82397	1.58292	0.113441		SPATA22	0.114939
170302	15.3636	2.88119	1.15628	2.49178	0.0127104	0.201471	ARX	0.359078
197196	1.1135	2.85654	2.78553	1.02549	0.30513		LINC00311	0.0671361
1791	4.71362	2.84315	1.53645	1.85046	0.0642467		DNTT	0.186487
3834	16.0282	-2.84117	0.803197	-3.53732	0.00040421	0.0235855	KIF25	-0.687028
4103	33.4368	-2.83403	0.911582	-3.10891	0.0018778	0.0608868	MAGEA4	-0.489497
50652	3.71496	2.76554	1.58411	1.7458	0.0808449		PCA3	0.130889
326	12.9466	2.75405	1.14155	2.41255	0.0158415	0.225185	AIRE	0.282993
4069	2.6368	2.75266	2.1037	1.30849	0.190709		LYZ	0.0496718
8436	1.88486	-2.73991	1.86692	-1.4676	0.142212		SDPR	-0.136768
389015	4.37909	2.73021	1.37447	1.98638	0.0469912		SLC9A4	0.267713
58	3720.39	2.72347	0.715799	3.8048	0.000141919	0.0112477	ACTA1	0.67575
9211	2.42029	-2.72046	1.83682	-1.48107	0.138587		LGI1	-0.125427
150538	1.87617	2.69665	1.92752	1.39902	0.161806		SATB2-AS1	0.117876
768239	2.58973	-2.69267	1.52333	-1.76762	0.0771244		PSAPL1	-0.206451
400500	0.968816	2.68851	2.91399	0.922622	0.356204		BCAR4	0.0588124
127343	5.63515	-2.67392	1.07098	-2.4967	0.0125357		DMBX1	-0.41917
93979	2.99916	2.64671	1.66552	1.58912	0.112033		CPA5	0.139058
153918	0.576213	2.60966	3.08585	0.845686	0.397728		ZC2HC1B	0.0628959
22986	370.724	2.60958	0.226495	11.5216	1.02706e-30	1.72567e-26	SORCS3	2.09902
84525	1.20437	-2.60753	2.81981	-0.924717	0.355113		HOPX	-0.040269
193629	1.57179	2.59766	1.95289	1.33017	0.183463		LINC00189	0.105777
129025	12.1905	-2.597	1.02562	-2.53213	0.0113372	0.187672	ZNF280A	-0.301105
57408	1.85029	2.59312	2.62916	0.986295	0.323988		LRTM1	0.0877283
5079	8.94852	-2.59228	1.14441	-2.26518	0.0235019		PAX5	-0.227254
23532	1.55952	-2.59171	2.04193	-1.26925	0.204352		PRAME	-0.119047
11185	33.0129	-2.58591	0.838242	-3.08492	0.0020361	0.0644266	INMT	-0.41808
23120	22.328	-2.58452	0.963912	-2.68128	0.00733407	0.147179	ATP10B	-0.339712
343641	0.70589	-2.58214	3.09557	-0.83414	0.404202		TGM6	-0.0650639
23584	6.5124	-2.57571	1.06298	-2.4231	0.0153886		VSIG2	-0.420938
100313914	0.672983	2.5669	3.09168	0.830259	0.406393		MIR548J	0.0645066
388387	1.38794	-2.55737	2.09709	-1.21949	0.222659		LINC00671	-0.107967
378925	7.99422	2.54482	1.10234	2.30857	0.0209676		RNF148	0.319607
26579	15.0968	-2.53186	0.817088	-3.09864	0.00194413	0.062248	MYEOV	-0.568666
100506371	1.35663	2.53069	2.56163	0.987923	0.32319		AC108004.2	0.0862889
54440	0.955698	-2.51923	3.10088	-0.812425	0.416548		SASH3	-0.0670992
50514	24.6598	2.50832	0.803913	3.12014	0.00180765	0.060106	DEC1	0.512555
400680	107.522	-2.50423	1.30884	-1.91332	0.0557072	0.418976	LINC00664	-0.318069
6909	0.669896	2.50112	3.09531	0.808035	0.419071		TBX2	0.0643994
654429	5.4838	-2.4968	1.12453	-2.2203	0.0263983		LRTM2	-0.309519
387715	1.37458	2.48434	2.03134	1.22301	0.221326		ARMS2	0.112071
80125	4.94024	-2.48281	1.40443	-1.76784	0.0770872		CCDC33	-0.156791
140690	83.059	-2.48126	0.651174	-3.81044	0.000138719	0.0110462	CTCFL	-0.691542
57381	8.0183	2.48018	1.15608	2.14534	0.031926		RHOJ	0.37113
3081	6.34977	2.47623	1.1028	2.24541	0.0247416		HGD	0.309657
3850	1.51131	2.47377	2.00156	1.23592	0.216489		KRT3	0.092377
7180	3.42641	2.45928	1.64312	1.49671	0.134468		CRISP2	0.103331
645323	7.34118	-2.45326	1.14125	-2.14963	0.0315845		LINC00461	-0.254446
494558	12.2042	2.4521	1.12186	2.18574	0.0288347	0.306828	C9orf135-AS1	0.324241
359787	355.231	2.45006	0.791948	3.09371	0.00197673	0.0630737	DPPA3	0.548648
222662	1.00512	-2.44047	2.85122	-0.855939	0.392032		LHFPL5	-0.0626446
342850	1.30324	-2.44025	2.07774	-1.17447	0.240206		ANKRD62	-0.10786
137835	0.811183	-2.43516	3.07634	-0.791577	0.428607		TMEM71	-0.0493602
2890	633.389	2.43039	0.641953	3.78592	0.000153138	0.011828	GRIA1	0.798594
344	2.11793	-2.41448	1.65527	-1.45866	0.144659		APOC4-APOC2	-0.157903
158248	2.13079	2.41387	1.95824	1.23268	0.217697		TTC16	0.12379
284424	6.95338	2.41161	0.991348	2.43265	0.0149886		MIR7-3HG	0.471501
22797	3.34733	-2.40509	1.73105	-1.38938	0.164717		TFEC	-0.181101
245972	1.36581	-2.40399	2.57168	-0.934796	0.349893		ATP6V0D2	-0.0856748
1442	18.2313	2.40375	1.16932	2.05569	0.0398123	0.363982	CSH2	0.321901
51299	59.8107	2.38912	0.678536	3.521	0.000429928	0.0244869	NRN1	0.806799
72	694.232	2.38797	0.385235	6.19873	5.69219e-10	5.17484e-07	ACTG2	1.29802
653247	2.79683	2.38539	1.56551	1.52371	0.127581		PRB2	0.184824
3760	160.738	2.38155	0.589206	4.04197	5.30041e-05	0.00549577	KCNJ3	0.939251
6011	3.26567	2.38152	1.3528	1.76043	0.0783342		GRK1	0.222739
83483	8.53965	-2.3729	1.03493	-2.29282	0.0218581		PLVAP	-0.36285
100302261	0.586728	2.36669	3.09839	0.763845	0.44496		MIR1910	0.0632088
7757	2312.07	-2.36421	1.74056	-1.3583	0.174369	0.661997	ZNF208	-0.0850367
56891	36.8325	2.35887	0.767634	3.07292	0.00211978	0.0658347	LGALS14	0.769363
3248	392.83	2.35794	0.756829	3.11555	0.00183601	0.0603693	HPGD	0.573005
220082	5.34108	-2.35032	1.28847	-1.82412	0.0681346		SPERT	-0.200335
100506585	2.76791	2.34698	1.7196	1.36484	0.172303		AC011899.9	0.170084
29850	6.14544	2.33909	1.31949	1.77272	0.0762758		TRPM5	0.104584
100507144	2.86351	2.33341	1.56866	1.48752	0.136878		RP4-607I7.1	0.144471
79626	4.57158	-2.3224	1.28638	-1.80537	0.0710171		TNFAIP8L2	-0.207917
10917	2.41827	-2.31769	1.73003	-1.33968	0.180349		BTNL3	-0.107401
2125	286.383	2.31681	0.854297	2.71195	0.00668892	0.138681	EVPL	0.500563
3024	2.96541	2.31524	2.11705	1.09362	0.274122		HIST1H1A	0.0414762
3211	2.51648	-2.3127	1.74032	-1.3289	0.183882		HOXB1	-0.126973
100506790	7.03802	2.31031	1.381	1.67292	0.0943425		RP11-265D19.6	0.275586
3481	6.7289	2.3095	1.07514	2.14809	0.0317065		IGF2	0.300275
118663	1.9972	2.30707	1.82811	1.262	0.20695		BTBD16	0.0948977
117581	45.4473	-2.29907	0.955743	-2.40553	0.0161491	0.226303	TWIST2	-0.0328704
128602	0.585373	2.29888	3.10241	0.740999	0.458694		C20orf85	0.0624135
9023	888.651	2.29778	0.844361	2.72133	0.00650199	0.13571	CH25H	0.521583
643650	3.34015	-2.29751	1.4787	-1.55374	0.120248		LINC00842	-0.203047
29113	0.911254	-2.29362	2.9485	-0.777894	0.436631		C6orf15	-0.0573102
89766	2.35774	2.29157	1.62761	1.40794	0.159149		UMODL1	0.13956
164380	3.65041	2.2914	1.95687	1.17095	0.241618		CST13P	0.0859629
187	29.1148	-2.29133	0.643733	-3.55945	0.000371638	0.0222216	APLNR	-0.88546
401478	1.38306	2.2891	2.27199	1.00753	0.313679		RP11-238K6.1	0.0881635
148198	9.06378	-2.28095	1.1521	-1.97981	0.0477247	0.391538	ZNF98	-0.373194
100505967	1.70379	2.2687	2.12375	1.06826	0.285405		LINC00645	0.110456
6581	586.75	2.26533	0.340136	6.66006	2.73712e-11	4.07619e-08	SLC22A3	1.4537
9075	1.53941	-2.26506	2.37087	-0.955372	0.33939		CLDN2	-0.0585295
100507127	841.206	-2.26503	0.686405	-3.29984	0.000967408	0.0417851	LINC00707	-0.240419
4634	8.00206	2.26372	1.04181	2.17288	0.0297894		MYL3	0.28874
117579	0.882298	-2.24994	3.02084	-0.744807	0.456388		RLN3	-0.0553907
9506	6.7102	-2.24639	0.945908	-2.37485	0.0175562		PAGE4	-0.411282
5967	3.75223	-2.24133	1.94457	-1.15261	0.249071		REG1A	-0.121868
7123	4.11566	-2.23788	1.25842	-1.77832	0.075351		CLEC3B	-0.218395
1311	51.6525	2.23227	0.524216	4.2583	2.05992e-05	0.00266819	COMP	1.01819
440699	0.614081	-2.22988	3.10924	-0.71718	0.473263		LRRC52	-0.0637465
57113	13.5151	2.2277	0.965108	2.30824	0.0209859	0.257667	TRPC7	0.363892
1557	4.73071	-2.2236	1.45186	-1.53156	0.125632		CYP2C19	-0.22178
138307	0.868228	-2.22281	2.63139	-0.844729	0.398262		LCN8	-0.0552471
201243	3.30839	-2.2214	1.38847	-1.59989	0.109623		C17orf74	-0.210288
27121	1.02563	-2.21966	2.82139	-0.786726	0.431442		DKK4	-0.0484753
160492	0.917354	2.21927	3.08445	0.719501	0.471832		IFLTD1	0.0516499
645202	1.26884	-2.21536	2.11591	-1.04701	0.295097		GOLGA6L1	-0.0979752
1750	1.51845	2.20779	2.34479	0.941574	0.346411		DLX6	0.0529949
7305	2.99936	2.20144	1.7121	1.28581	0.198508		TYROBP	0.152912
100506428	3.90941	2.19698	1.25488	1.75075	0.0799892		CBR3-AS1	0.259225
100302161	0.799342	2.19536	3.10336	0.707414	0.479309		MIR1205	0.0655656
5619	11.9926	2.18888	0.821252	2.66529	0.00769209	0.151112	PRM1	0.498967
7472	1.12317	-2.18782	2.46401	-0.887912	0.374588		WNT2	-0.0696751
10368	6.75283	2.18488	1.12511	1.94193	0.052145		CACNG3	0.325787
221122	0.808319	-2.17717	3.08153	-0.706521	0.479864		AC068858.1	-0.0519294
407009	0.690365	2.17521	2.86641	0.758863	0.447935		MIR224	0.0503938
9370	1.29458	2.17477	2.62535	0.828375	0.407458		ADIPOQ	0.0668936
579	3.46847	-2.17232	1.32716	-1.63681	0.101669		NKX3-2	-0.187522
9758	332.554	2.15978	0.465803	4.63668	3.54055e-06	0.000716727	FRMPD4	1.08184
338872	2.43146	2.15946	1.88143	1.14778	0.251061		C1QTNF9	0.131939
574464	0.485618	2.15877	3.10607	0.695016	0.487045		MIR520F	0.05852
144321	3.96233	-2.15417	1.47492	-1.46054	0.144143		GLIPR1L2	-0.126336
359	0.678679	2.15078	3.10978	0.691617	0.489178		AQP2	0.0642837
4680	0.613415	-2.14696	3.11199	-0.689898	0.490258		CEACAM6	-0.0636652
284532	1.14774	-2.14541	2.17657	-0.985684	0.324288		OR14A16	-0.0872806
9358	3.33561	-2.14531	1.59305	-1.34667	0.178086		ITGBL1	-0.155582
2492	0.722552	-2.14411	3.08641	-0.694694	0.487247		FSHR	-0.0487621
9365	13.0054	2.14028	0.720031	2.97248	0.00295402	0.0808363	KL	0.614107
55999	5.34416	2.13972	1.14878	1.8626	0.0625186		NXF4	0.307316
2845	4.10823	2.13349	1.18728	1.79695	0.0723434		GPR22	0.281208
4018	22.3633	2.13201	0.657178	3.24419	0.00117787	0.0471204	LPA	0.662125
81621	23.839	-2.13189	0.580611	-3.6718	0.000240852	0.0163177	KAZALD1	-0.81243
8403	6.97422	-2.12722	0.905537	-2.34912	0.0188177		SOX14	-0.43705
56163	2.68129	-2.12176	1.52821	-1.38839	0.165019		RNF17	-0.14305
4114	3.28746	-2.11922	1.6428	-1.29001	0.197047		MAGEB3	-0.152643
4499	41.5322	2.11847	0.93236	2.27215	0.0230772	0.272675	MT1M	0.32838
932	1.38875	2.10954	3.05121	0.691377	0.489328		MS4A3	0.0210886
283480	2.79395	2.10923	1.75433	1.2023	0.229248		FGF14-IT1	0.0313474
1830	80.3711	2.10737	0.694384	3.03488	0.0024063	0.0716857	DSG3	0.473402
2528	2.12193	-2.10477	1.95057	-1.07905	0.280564		FUT6	-0.0918024
729156	4.84043	2.09436	1.13621	1.84328	0.065288		GTF2IRD1P1	0.266482
27063	7.86349	-2.09394	1.21678	-1.72089	0.0852707		ANKRD1	-0.227039
284415	11.2916	-2.09363	1.12126	-1.8672	0.0618736	0.439577	VSTM1	-0.224093
401207	26.9414	2.09349	0.797891	2.62378	0.00869597	0.16314	C5orf63	0.484132
1592	1175.06	2.09327	0.365096	5.73347	9.83983e-09	6.61315e-06	CYP26A1	1.27524
728858	3.74517	2.08618	1.39714	1.49318	0.135389		C12orf71	0.143128
10369	1.00216	2.08226	2.56376	0.812188	0.416684		CACNG2	0.0546702
80319	26.6255	-2.07924	0.581907	-3.57314	0.000352722	0.0215507	CXXC4	-0.755253
136288	74.476	2.07694	0.544348	3.81545	0.000135932	0.0110335	C7orf57	0.913138
1010	5.6628	-2.07616	1.07183	-1.93702	0.0527425		CDH12	-0.290239
2525	14.0881	-2.07278	0.880353	-2.35448	0.0185485	0.242669	FUT3	-0.320873
100294720	0.602577	2.07206	3.11292	0.665632	0.505647		RP11-55K22.5	0.0626819
642843	1.18139	-2.07101	2.40454	-0.861289	0.389079		CPSF4L	-0.07625
4892	1.81073	2.0707	2.17551	0.951824	0.341186		NRAP	0.070133
401134	0.912638	2.07026	2.95483	0.700637	0.483529		RP11-707A18.1	0.0548399
7143	0.981529	2.0642	2.27183	0.908608	0.363557		TNR	0.0720876
100507428	1847.53	-2.06339	0.817113	-2.52522	0.0115626	0.188617	LINC00458	-0.232285
161514	1.00203	-2.06291	3.08612	-0.668446	0.503849		TBC1D21	-0.0539984
5081	5.6953	-2.05251	1.22349	-1.67759	0.093428		PAX7	-0.153544
284366	2.21154	-2.05096	1.81255	-1.13153	0.25783		KLK9	-0.110922
54988	0.992708	-2.05096	2.53973	-0.80755	0.419349		ACSM5	-0.0573431
2527	4.76605	-2.04827	1.5883	-1.2896	0.19719		FUT5	-0.170246
23495	0.817547	-2.04791	3.09196	-0.662333	0.507758		TNFRSF13B	-0.0495119
163742	12.7936	2.04779	1.0036	2.04044	0.0413064	0.368186	SLC25A3P1	0.404339
284798	1.80479	2.04751	2.11615	0.967565	0.333262		RP4-738P15.1	0.075413
100287728	1.75984	-2.04507	2.00777	-1.01858	0.308403		RP11-85L21.4	-0.0863554
100302195	0.99195	-2.041	3.09966	-0.658459	0.510243		MIR320C2	-0.0670128
100144604	2.66836	-2.0374	1.49031	-1.3671	0.171593		LINC00930	-0.15663
10265	22.5756	-2.03241	0.658022	-3.08867	0.00201053	0.0637376	IRX5	-0.639293
845	1.07941	-2.03202	3.07834	-0.660102	0.509189		CASQ2	-0.0541224
727832	2.23133	-2.03158	1.76477	-1.15119	0.249656		GOLGA6L6	-0.157202
693164	1.12503	-2.03121	2.4211	-0.838961	0.401491		MIR579	-0.0717894
121006	0.595585	-2.02906	3.11708	-0.65095	0.515079		FAM186A	-0.0631034
338322	57.4413	2.02661	0.765538	2.64731	0.00811359	0.156335	NLRP10	0.556759
8470	5247.18	2.02519	0.270174	7.49586	6.58655e-14	1.58096e-10	SORBS2	1.47916
100313824	0.720021	-2.02501	3.08953	-0.655443	0.512182		MIR663B	-0.046739
30012	5.04272	2.02443	1.26891	1.59541	0.110621		TLX3	0.228191
7480	7.75671	-2.02334	1.02258	-1.97866	0.0478546		WNT10B	-0.342328
1586	0.409726	-2.02214	3.11518	-0.649126	0.516257		CYP17A1	-0.049668
124872	1.70844	2.01839	1.97364	1.02267	0.306462		B4GALNT2	0.104553
406944	0.49993	-2.01694	3.11669	-0.647142	0.51754		MIR153-1	-0.0589783
6846	3.70159	-2.01605	1.59784	-1.26173	0.207046		XCL2	-0.102413
5133	33.534	-2.0135	0.595294	-3.38237	0.000718626	0.0341636	PDCD1	-0.686795
79981	18.0769	-2.01277	1.13214	-1.77785	0.0754292	0.477169	FRMD1	-0.0299033
400619	2.00865	-2.00971	2.02025	-0.994783	0.319842		LINC00511	-0.0982498
338557	4.42887	2.00756	1.17027	1.71547	0.0862584		FFAR4	0.254111
92162	27.3538	-2.00569	0.678789	-2.9548	0.00312869	0.0834416	TMEM88	-0.556052
4118	2.77098	2.00175	1.61017	1.2432	0.213796		MAL	0.162755
148	152.201	1.99951	0.432855	4.61935	3.84952e-06	0.000760937	ADRA1A	1.00716
6276	6.95906	-1.99866	0.94805	-2.10818	0.0350153		S100A5	-0.38806
441328	0.921807	-1.99824	2.33958	-0.854099	0.39305		FAM90A10P	-0.0648039
285095	6.39497	-1.99268	0.997251	-1.99817	0.045698		AC131097.4	-0.339036
128876	4.23232	1.98998	1.41822	1.40315	0.160571		FAM83C	0.20267
340665	14.6899	1.9861	0.829388	2.39465	0.016636	0.230816	CYP26C1	0.513401
57818	1.0203	1.98395	3.08642	0.642799	0.520355		G6PC2	0.0524684
56001	46.7704	-1.98022	0.549209	-3.60559	0.000311442	0.0195255	NXF2	-0.810452
221241	1.93644	1.9778	1.91632	1.03208	0.302035		LINC00305	0.101054
6317	34.5784	1.97704	0.821732	2.40594	0.0161308	0.22627	SERPINB3	0.312995
388333	0.590398	-1.97273	3.09309	-0.637786	0.523613		SPDYE4	-0.0444443
59067	0.733296	-1.96671	3.09092	-0.636289	0.524588		IL21	-0.0464631
6783	1.13767	1.96429	3.07471	0.638852	0.522919		SULT1E1	0.0530294
8808	1.97808	1.96403	2.12834	0.922798	0.356112		IL1RL2	0.096901
340146	115.493	1.96178	0.487433	4.02473	5.70411e-05	0.00577352	SLC35D3	0.921699
125336	18.0635	-1.96061	0.763862	-2.5667	0.010267	0.178251	LOXHD1	-0.506429
340260	2.14618	1.9599	2.25021	0.870985	0.383763		UNCX	0.106991
25797	616.911	-1.95949	1.12333	-1.74437	0.0810949	0.493859	QPCT	-0.147173
2124	0.716334	-1.95889	3.08982	-0.633982	0.526093		EVI2B	-0.0465693
390072	3.77534	-1.95617	1.33937	-1.46051	0.14415		OR52N4	-0.190448
5089	7169.14	-1.94984	0.244585	-7.97201	1.56112e-15	6.5575e-12	PBX2	-1.49544
765	0.609629	1.94666	3.11794	0.624342	0.532403		CA6	0.0631531
8200	0.777445	-1.94655	3.06682	-0.634713	0.525615		GDF5	-0.0227224
133874	16.7763	-1.94651	0.739639	-2.6317	0.00849588	0.160752	C5orf58	-0.486229
245806	49.5296	1.94553	0.668212	2.91155	0.00359645	0.0915568	VGLL2	0.643866
135941	1.7434	-1.9443	2.12301	-0.915824	0.359759		OR2A14	-0.0657595
386682	0.535172	-1.94218	3.12042	-0.622409	0.533673		KRTAP10-3	-0.0604147
100288077	37.1191	-1.9406	0.84923	-2.28513	0.0223055	0.267316	WTAPP1	-0.319495
728458	0.541708	-1.93728	3.11932	-0.621059	0.534561		OPN1MW	-0.0609673
50846	1.90734	1.93696	1.84792	1.04819	0.294553		DHH	0.0681642
4184	0.69106	1.93686	3.08951	0.626913	0.530716		SMCP	0.0462521
167826	33.4154	1.93681	0.621494	3.11638	0.00183089	0.0603188	OLIG3	0.639707
149086	0.816107	1.93515	3.08874	0.626517	0.530976		RP11-439L8.3	0.0470652
100505540	0.508656	1.93474	3.11689	0.620729	0.534778		RP11-453E2.2	0.0593297
729	0.519613	-1.92988	3.11998	-0.618555	0.53621		C6	-0.0599971
285834	0.917371	-1.9277	3.08853	-0.62415	0.532529		HCG22	-0.0525459
338761	89.9771	-1.92707	0.60053	-3.20896	0.00133218	0.0502996	C1QL4	-0.660022
8852	0.502205	1.92629	3.11645	0.618105	0.536506		AKAP4	0.0590876
442904	0.467297	1.92512	3.11629	0.617758	0.536735		hsa-mir-335	0.0573214
2828	15.8876	-1.92436	0.617879	-3.11445	0.00184285	0.0604757	GPR4	-0.688803
51475	0.866567	1.92302	3.07365	0.625646	0.531547		CABP2	0.0342966
784	357.102	-1.92123	0.252879	-7.59744	3.02055e-14	8.45856e-11	CACNB3	-1.47271
148156	1285.57	-1.9207	1.88945	-1.01654	0.309373	0.787947	ZNF558	0.00334357
5341	1.75052	-1.91354	2.15815	-0.88666	0.375262		PLEK	-0.0572313
100507254	0.718633	-1.91291	3.09553	-0.61796	0.536601		LINC01013	-0.0463402
9350	128.78	-1.9094	0.601831	-3.17266	0.00151049	0.053206	CER1	-0.679734
8778	2.2823	-1.90471	1.81007	-1.05229	0.292669		SIGLEC5	-0.146365
10586	3.85036	1.90352	1.34345	1.41689	0.156516		MAB21L2	0.13846
342618	1.79061	-1.90134	2.01624	-0.943014	0.345674		SLFN14	-0.0133653
728343	46.1483	-1.89937	0.558947	-3.39813	0.000678485	0.0325712	NXF2	-0.77689
26077	0.59086	1.89608	3.09288	0.613048	0.539845		CTD-2050B12.2	0.0419892
5739	3.82155	-1.89398	1.61829	-1.17035	0.241858		PTGIR	-0.108313
100287226	95.3923	-1.89304	3.02486	-0.625828	0.531428	0.896307	ZNF729	-0.0744368
7103	1.61041	1.89232	2.21563	0.85408	0.39306		TSPAN8	0.0647544
100507261	2.07502	-1.88544	1.78357	-1.05712	0.290459		MIR670HG	-0.127176
100507520	33.7876	-1.88422	0.557145	-3.38193	0.00071979	0.0341636	RP11-1055B8.4	-0.741329
93377	18.5449	1.88177	0.735441	2.5587	0.0105064	0.180869	OPALIN	0.570812
3577	1.10628	1.8808	3.07663	0.611318	0.540989		CXCR1	0.0558331
3037	1978.29	1.8799	0.303485	6.19437	5.8518e-10	5.17484e-07	HAS2	1.30055
1580	1.14952	1.87646	2.17219	0.863856	0.387667		CYP4B1	0.0675085
6473	9.71828	-1.86894	1.01846	-1.83506	0.0664974	0.454676	SHOX	-0.228041
100506405	37.3256	-1.86679	0.486239	-3.83925	0.000123409	0.010316	AC106875.1	-0.912854
100126296	1.37029	-1.86636	2.56478	-0.727688	0.466805		MIR298	-0.0441208
26228	1.21684	-1.86349	2.71262	-0.686972	0.492101		STAP1	-0.0328772
317701	1.23317	1.86197	2.34107	0.79535	0.42641		VN1R2	0.077566
100462977	0.999631	1.85821	3.0636	0.606545	0.544153		MTRNR2L1	0.0160916
693181	7.61347	1.85739	1.04778	1.77269	0.0762794		MIR596	0.312887
100507175	1.84802	1.85667	1.75475	1.05808	0.290018		RP11-542B15.1	0.0737136
3747	10.471	1.85622	0.771218	2.40687	0.0160899	0.22627	KCNC2	0.499464
168433	5.75645	1.85579	1.04694	1.77259	0.0762963		RNF133	0.27713
9027	0.904211	1.85485	2.62154	0.707541	0.47923		NAT8	0.0511797
113835	78.3305	-1.8531	0.842968	-2.1983	0.0279275	0.30118	ZNF257	-0.390348
100287718	0.813004	1.84969	3.08762	0.599066	0.549129		ANKRD66	0.0492649
389332	11.4411	1.84776	0.783728	2.35765	0.0183909	0.241598	AC009014.3	0.482561
11199	0.714997	1.84745	3.09617	0.596688	0.550715		ANXA10	0.0435249
63970	2.01295	-1.84665	1.85196	-0.99713	0.318701		TP53AIP1	-0.0738687
140801	1.89726	1.84308	1.83351	1.00522	0.314791		RPL10L	0.131368
79191	74.2082	-1.84214	0.359064	-5.1304	2.89122e-07	0.000112122	IRX3	-1.14634
1673	0.894756	1.8387	3.10491	0.592192	0.553722		DEFB4B	0.06627
51086	18.8334	-1.8382	0.72259	-2.5439	0.0109622	0.185169	FPGT-TNNI3K	-0.501686
100506929	1.16435	1.83554	2.75402	0.666496	0.505094		RP11-80B9.4	0.0545998
731779	0.701396	1.83542	3.09575	0.592882	0.55326		CTD-3064M3.1	0.0430198
11075	248.243	1.83153	0.445676	4.10956	3.9641e-05	0.0043819	STMN2	1.0857
100507341	1.07433	1.83132	2.81401	0.650787	0.515184		SMIM18	0.0382598
3887	1.19994	-1.83034	2.16927	-0.843757	0.398805		KRT81	-0.0471824
55539	0.881105	1.82982	2.39501	0.764015	0.444858		KCNQ1DN	0.0600528
390054	1.20338	-1.8274	1.93979	-0.942064	0.34616		OR52A5	-0.0874177
27201	8.60415	-1.82596	0.871826	-2.09441	0.0362237		GPR78	-0.371245
64577	4.60222	-1.8225	1.27323	-1.4314	0.152317		ALDH8A1	-0.199784
693141	1.30527	1.81969	2.65027	0.686605	0.492332		MIR556	0.0634683
3575	1.21425	1.8168	3.05802	0.594111	0.552438		IL7R	0.0114052
5105	0.838019	-1.8145	3.08043	-0.589042	0.555833		PCK1	-0.0343573
5744	3.14817	1.81175	1.33765	1.35443	0.175598		PTHLH	0.191232
278	8.4131	-1.81069	1.07792	-1.6798	0.0929959		AMY1A	-0.245577
154822	2.03858	1.80864	1.62968	1.10981	0.26708		LINC00689	0.11633
100033423	0.682404	1.80741	3.09672	0.583652	0.559454		SNORD116-11	0.0441762
100313840	0.630192	-1.80363	3.09843	-0.582112	0.560491		MIR2115	-0.0423632
648791	15.2862	1.80245	0.802043	2.24732	0.0246195	0.28205	PPP1R3G	0.334143
276	8.31678	-1.8014	1.07936	-1.66896	0.0951258		AMY1A	-0.242566
693131	0.594778	-1.79976	3.09737	-0.58106	0.5612		MIR548AA2	-0.0411175
406969	0.686342	1.79961	3.09626	0.58122	0.561092		MIR194-1	0.045428
728461	1.80011	-1.79679	1.89775	-0.9468	0.343741		CSAG1	-0.049855
911	13.1076	-1.79647	0.884363	-2.03138	0.042217	0.371938	CD1C	-0.444386
10512	107.461	-1.79552	0.402021	-4.46624	7.96055e-06	0.00131131	SEMA3C	-1.01413
100302122	0.416927	-1.79519	3.12542	-0.574384	0.565708		MIR1183	-0.049668
6363	0.427556	-1.79468	3.12386	-0.574506	0.565625		CCL19	-0.049668
402569	0.420773	-1.79439	3.12379	-0.574427	0.565679		KPNA7	-0.049668
388815	0.427728	-1.79418	3.12375	-0.574368	0.565719		LINC00478	-0.049668
222826	0.814614	1.79404	3.09338	0.579961	0.561941		FAM217A	0.0473996
153579	20.9148	-1.79279	0.638411	-2.80821	0.00498181	0.114507	BTNL9	-0.592514
5232	1.88723	1.79109	1.70364	1.05133	0.293106		PGK2	0.0967208
843	198.664	-1.79015	0.265732	-6.73668	1.62051e-11	2.72278e-08	CASP10	-1.3363
440107	0.409554	-1.79002	3.12432	-0.57293	0.566692		PLEKHG7	-0.049668
257358	8.10122	-1.78995	1.47049	-1.21725	0.223509		CTB-114C7.3	-0.124568
5949	8.20501	-1.78922	0.857894	-2.08559	0.0370155		RBP3	-0.394327
151121	0.409898	-1.78893	3.12427	-0.57259	0.566922		AC079586.1	-0.049668
51151	3.9295	1.78759	1.53328	1.16586	0.24367		SLC45A2	0.0530533
284257	1.31798	1.78752	2.13661	0.836616	0.402809		BOD1L2	0.0506794
3371	4790.42	1.78749	0.284199	6.2896	3.18292e-10	3.5653e-07	TNC	1.25896
442721	4.66583	-1.7868	1.17494	-1.52076	0.12832		LMOD2	-0.215576
56923	8.1583	-1.78607	1.06263	-1.6808	0.0928016		NMUR2	-0.238434
729587	0.583862	-1.7858	3.09763	-0.576505	0.564274		FAM231A	-0.0445366
416	2.19411	1.78448	1.59849	1.11635	0.264272		ARSF	0.1089
613211	1.50667	-1.78234	2.10707	-0.845886	0.397617		DEFB134	-0.0636565
623	2.21288	-1.78057	1.87908	-0.947575	0.343346		BDKRB1	-0.072438
124535	1.23942	1.77625	2.6874	0.660957	0.50864		HSF5	0.058332
55998	1.14112	-1.77601	2.40459	-0.73859	0.460156		NXF5	-0.0715881
415056	0.818703	-1.77386	2.43526	-0.728407	0.466364		CNTFR-AS1	-0.0536075
6554	3.81976	1.77348	1.3439	1.31965	0.186952		SLC10A1	0.0925078
196792	4.15449	-1.77142	1.62381	-1.09091	0.275314		FAM24B	-0.13888
283404	0.807655	-1.76898	2.43981	-0.725051	0.468421		LINC00592	-0.0528758
9077	14.3239	1.76872	0.985327	1.79506	0.0726436	0.470396	DIRAS3	0.393924
207107	7.1655	-1.76733	1.13375	-1.55884	0.119034		SFTA1P	-0.211633
6318	128.8	1.76706	0.581601	3.03826	0.00237946	0.071265	SERPINB4	0.496442
5473	13.2861	1.76624	0.89086	1.98262	0.0474098	0.390439	PPBP	0.35928
5396	2.59231	1.7648	1.42013	1.24271	0.213975		PRRX1	0.158857
445372	0.827981	-1.76344	3.09481	-0.569805	0.56881		TRIM6-TRIM34	-0.049939
388882	0.971753	-1.76242	2.56321	-0.687582	0.491716		AP000345.1	-0.059415
9960	616.734	-1.76172	0.746672	-2.35943	0.0183029	0.241575	USP3	-0.303429
283299	117.589	1.76101	0.573428	3.07102	0.00213326	0.0659254	RP11-494M8.4	0.623413
27197	4.35856	1.75749	1.20211	1.46201	0.143739		GPR82	0.18846
6506	544.725	1.75671	0.195746	8.97442	2.84843e-19	1.59531e-15	SLC1A2	1.48811
84674	35.1809	-1.75353	0.470518	-3.7268	0.000193923	0.0142284	CARD6	-0.864596
219285	1.16458	1.7506	2.39626	0.730554	0.465052		SAMD9L	0.0537038
4956	0.801405	-1.74994	3.09263	-0.565841	0.571502		ODF1	-0.0485488
391365	7.54722	1.7494	1.11089	1.57477	0.115309		SULT6B1	0.228123
4224	3.62703	-1.74931	1.56232	-1.11969	0.262847		MEP1A	-0.172953
1178	118.321	1.7492	1.44612	1.20958	0.226439	0.71566	CLC	0.125042
128822	3.07774	1.74676	1.88731	0.925531	0.35469		CST9	0.145147
137209	180.184	1.74474	1.04232	1.67391	0.0941482	0.524669	ZNF572	0.220895
3239	2.44425	-1.74419	1.57646	-1.1064	0.268555		HOXD13	-0.0988137
254439	19.5101	-1.74082	0.661757	-2.63061	0.00852318	0.161045	C11orf86	-0.628575
84659	1.21763	-1.74017	2.71378	-0.641235	0.52137		RNASE7	-0.0592344
140880	4.61626	1.73935	1.26104	1.3793	0.167802		CST11	0.199754
100505583	4.7932	1.73884	1.14106	1.52388	0.127538		LINC00838	0.286351
79747	1.27142	-1.73821	1.92025	-0.905203	0.365358		ADGB	-0.0949682
100379661	4.46761	-1.73723	1.23434	-1.40741	0.159305		BACH1	-0.182582
3779	96.6747	1.73692	0.501539	3.46318	0.000533832	0.0281174	KCNMB1	0.775555
353164	2.12808	-1.73346	1.68507	-1.02872	0.303613		TAS2R42	-0.0941226
221718	0.725072	-1.73306	3.09592	-0.559789	0.575623		LINC00518	-0.0472506
125	1.35168	-1.73301	2.71273	-0.638845	0.522924		ADH1B	-0.0462852
474	27.8875	1.73218	0.595576	2.9084	0.00363279	0.0923421	ATOH1	0.603897
5549	27.6527	-1.72988	0.520136	-3.32583	0.000881564	0.0395808	PRELP	-0.760355
79192	60.4242	-1.728	0.568919	-3.03734	0.00238677	0.0713568	IRX1	-0.66549
3868	1.58721	1.72704	2.03237	0.849766	0.395455		KRT16	0.0601439
390093	4.53355	1.72446	1.20337	1.43303	0.15185		OR10A6	0.209755
131177	4.86771	-1.72434	1.19851	-1.43874	0.150224		FAM3D	-0.193571
283440	0.780654	1.72324	2.75935	0.624508	0.532294		RP11-885B4.2	0.0229681
3484	4.49791	1.72123	1.44516	1.19103	0.233641		IGFBP1	0.0529319
3172	3.41151	-1.72037	1.68002	-1.02402	0.305826		HNF4A	-0.110611
54456	8.91239	1.72022	1.12394	1.53052	0.125888		MOV10L1	0.109715
6236	6.63623	-1.7182	0.988912	-1.73747	0.0823046		RRAD	-0.264926
90865	1.80921	1.71762	2.04981	0.837939	0.402065		IL33	0.0921209
389903	1.80378	-1.71758	1.91475	-0.897027	0.369704		CSAG1	-0.031119
2694	0.40432	1.71503	3.12535	0.548748	0.583178		GIF	0.0478392
221833	631.959	-1.713	0.361993	-4.73212	2.22185e-06	0.000484825	SP8	-1.02609
54900	0.615183	-1.71253	3.10282	-0.551927	0.580999		LAX1	-0.0449934
6590	0.601445	-1.71247	3.10274	-0.551921	0.581002		SLPI	-0.0445156
127254	1.57401	-1.71241	1.79257	-0.955279	0.339437		C1orf173	-0.083724
147719	0.601617	-1.7118	3.1028	-0.551694	0.581158		LYPD4	-0.0445218
10141	1.76669	1.71131	1.78705	0.957615	0.338257		C4orf6	0.0702217
4494	680.576	1.71072	0.765874	2.23368	0.025504	0.287596	MT1F	0.456536
203569	0.649248	-1.7092	3.11482	-0.548732	0.58319		PAGE2	-0.0637848
3266	10.1685	1.7082	0.893303	1.91223	0.0558465	0.419173	ERAS	0.416091
2625	12.7665	-1.7071	0.858441	-1.9886	0.0467449	0.387473	GATA3	-0.332475
23671	326.726	1.70597	0.452185	3.77273	0.000161471	0.012332	TMEFF2	0.8522
100422974	0.411748	1.70561	3.12501	0.545795	0.585207		MIR3178	0.0478392
100287792	0.387355	1.70553	3.12337	0.546054	0.585029		RP4-640H8.2	0.0478392
645832	0.399501	1.70486	3.12334	0.545845	0.585172		VTN	0.0478392
3053	2.40729	-1.70455	1.53992	-1.10691	0.268334		SERPIND1	-0.11677
54769	21.9643	1.70451	0.912161	1.86865	0.061671	0.438694	DIRAS2	0.27273
100505633	1.05819	1.70374	3.08096	0.55299	0.58027		LINC01133	0.0432642
1007	31.6597	-1.70347	0.719003	-2.36921	0.0178262	0.239039	CDH9	-0.295843
259197	7.02151	-1.70335	1.01562	-1.67715	0.0935137		NCR3	-0.324327
89777	0.373376	1.70308	3.1248	0.545019	0.585741		SERPINB12	0.0475383
391104	0.873415	-1.70307	3.08536	-0.551986	0.580958		VHLL	-0.0528928
3859	1.3254	1.70306	2.31854	0.734538	0.462621		KRT12	0.0503725
146760	9.54791	-1.70209	1.1021	-1.5444	0.122491	0.578065	RTN4RL1	-0.22498
6582	83.4691	1.69671	0.581823	2.91619	0.00354335	0.0907552	SLC22A2	0.556277
283553	3.46097	-1.69667	1.38436	-1.22561	0.220347		LINC00640	-0.102985
650368	2582.92	-1.69379	0.563223	-3.00732	0.00263559	0.0750396	TSSC2	-0.634176
100462983	1.22588	1.69179	2.44507	0.691918	0.488989		MTRNR2L3	0.0330567
5212	10.8501	1.68814	0.814178	2.07343	0.0381324	0.354959	VIT	0.402513
4495	2010.76	1.68786	0.967477	1.7446	0.0810542	0.493859	MT1G	0.337387
148545	0.534753	-1.68539	3.12347	-0.53959	0.58948		NBPF4	-0.0599481
256380	0.939124	1.68434	3.09172	0.544791	0.585897		SCML4	0.052093
283767	2.42664	-1.68415	1.73345	-0.971559	0.33127		GOLGA6L1	-0.102958
6658	1225.77	-1.68302	0.314742	-5.34732	8.92679e-08	4.28537e-05	SOX3	-1.10495
93429	0.900253	-1.68233	3.07172	-0.547682	0.58391		AC006262.6	-0.00759187
162517	10.2127	1.68222	0.763023	2.20468	0.0274768	0.299977	FBXO39	0.449514
158376	5.69482	-1.6817	1.01555	-1.65596	0.0977307		LINC00961	-0.244167
5653	80.1833	-1.67934	0.353447	-4.75132	2.02092e-06	0.000458858	KLK6	-1.02644
10485	50.1537	-1.67847	0.412346	-4.07055	4.69023e-05	0.00501944	C1orf61	-0.932634
100507431	8.06307	1.67822	0.84746	1.9803	0.0476698		RP11-890B15.2	0.367962
388830	1.87956	-1.67648	2.07589	-0.807593	0.419325		LINC00316	-0.0631214
4635	3.39972	1.67601	1.30341	1.28587	0.198489		MYL4	0.136922
9104	176.677	1.67297	0.515375	3.24612	0.0011699	0.0470253	RGN	0.702023
10297	819.092	1.67285	0.333886	5.01024	5.43611e-07	0.000166068	APC2	1.01677
26343	8.73543	1.67094	0.92896	1.79872	0.0720636		OR5E1P	0.324152
387111	3.29543	1.67091	1.28782	1.29747	0.194469		LINC00222	0.163718
9162	94.7309	1.66821	0.385602	4.32625	1.51666e-05	0.00215957	DGKI	0.947381
79365	423.481	1.66572	0.338211	4.9251	8.43185e-07	0.000232249	BHLHE41	1.06411
79100	1.20196	-1.66506	2.41583	-0.689229	0.490679		LINC00626	-0.0527895
27123	37.0613	1.6622	0.615428	2.70089	0.00691544	0.141011	DKK2	0.542423
2069	3.30857	1.66139	1.40278	1.18436	0.236271		EREG	0.164778
388381	0.685235	-1.6601	3.08537	-0.538054	0.59054		C17orf98	-0.0282005
692214	1.72183	1.66003	1.59655	1.03976	0.29845		SNORD111	0.12861
145946	2.53764	1.65786	1.70102	0.974624	0.329747		SPATA8	0.15456
646938	2.01778	-1.656	1.74108	-0.951135	0.341536		RP11-160C18.4	-0.0486541
7033	10.8864	1.65565	0.818652	2.0224	0.0431346	0.376492	TFF3	0.439096
677845	1.28991	-1.6541	2.4092	-0.686577	0.492349		SNORA79	-0.0299401
123745	2.31047	-1.65185	1.69604	-0.973946	0.330083		PLA2G4E	-0.038353
285627	0.585164	1.65163	3.09792	0.53314	0.593936		AC008703.1	0.0420255
27145	878.267	-1.65143	0.248298	-6.65099	2.91122e-11	4.07619e-08	FILIP1	-1.29313
216	67.7311	-1.65121	0.521337	-3.16727	0.00153877	0.0537515	ALDH1A1	-0.683779
147381	2.40318	-1.64783	1.68741	-0.976548	0.328793		CBLN2	-0.11766
400696	4.84796	1.64759	1.63837	1.00562	0.314596		LGALS17A	0.162811
7780	30.0671	1.64581	0.535741	3.07203	0.00212607	0.0659081	SLC30A2	0.689775
161198	44.4069	1.64462	0.411572	3.99594	6.44388e-05	0.00636882	CLEC14A	0.901586
353149	72.1526	-1.64397	0.605204	-2.71639	0.00659988	0.137412	TBC1D26	-0.643139
643923	2.13803	1.64319	2.00231	0.820649	0.411846		ELMOD1	0.0735768
27133	282.717	1.64287	0.45622	3.60105	0.000316937	0.0197229	KCNH5	0.683827
10345	2199.03	-1.6428	0.833061	-1.97201	0.0486087	0.395508	TRDN	-0.256027
4489	9.87387	1.64222	1.2044	1.36352	0.17272	0.659553	MT1A	0.258054
407002	0.805352	1.64215	3.08963	0.531504	0.59507		MIR219-1	0.0490018
84643	0.607893	1.64172	3.10276	0.529117	0.596724		KIF2B	0.0424166
8717	11.9981	-1.63962	0.822905	-1.99248	0.0463187	0.387178	TRADD	-0.329938
100505878	0.568669	1.63682	3.10279	0.527533	0.597824		CTC-493L21.1	0.039096
9840	2.11723	-1.63206	1.8626	-0.876225	0.380907		TESPA1	-0.0626501
100505474	0.713829	-1.63118	3.09923	-0.526318	0.598667		RP11-456O19.4	-0.0467811
84868	9.5476	-1.63117	0.98729	-1.65217	0.0985002	0.536641	HAVCR2	-0.287975
8638	1.4068	-1.62813	1.8513	-0.879452	0.379156		OASL	-0.0800411
400710	8.80663	-1.62787	0.981092	-1.65924	0.0970677		CTD-2126E3.1	-0.371345
3311	3.48554	-1.62582	1.32184	-1.22997	0.218707		HSPA7	-0.142338
159296	0.562095	1.62502	3.11515	0.52165	0.601914		NKX2-3	0.0607324
23440	1.10033	-1.62421	2.21226	-0.734187	0.462835		OTP	-0.0390871
440956	2.30134	1.62241	1.92863	0.841225	0.400222		IQCF6	0.113379
118932	4.7003	-1.62129	1.47104	-1.10214	0.270401		ANKRD22	-0.222079
400823	3.11126	-1.62088	1.30084	-1.24602	0.212757		FAM177B	-0.177192
646480	1.23598	1.61983	2.12814	0.761148	0.446568		FABP9	0.0449194
100302135	0.747655	-1.61965	3.09681	-0.523006	0.60097		MIR320C1	-0.0473605
8542	1.78055	1.61923	1.87952	0.861513	0.388955		APOL1	0.0989437
2974	6.91138	1.61831	1.07331	1.50777	0.131613		GUCY1B2	0.206985
100131208	1.78575	-1.6179	1.74696	-0.926125	0.354381		SNAP25-AS1	-0.0729803
8110	4.69172	-1.61743	1.1645	-1.38895	0.164848		DPF3	-0.193079
3732	290.142	-1.61633	0.245655	-6.57967	4.71496e-11	6.09391e-08	CD82	-1.27276
64399	147.91	1.61483	0.958225	1.68523	0.0919442	0.521027	HHIP	0.270369
2348	20.1476	-1.61438	0.625392	-2.58139	0.00984038	0.174776	FOLR1	-0.579326
642691	2.47013	1.61339	1.61814	0.997065	0.318733		NKAIN1P1	0.162538
137868	2.33298	1.61276	1.60309	1.00603	0.314399		SGCZ	0.0920901
2327	5.03971	-1.61268	1.20135	-1.34239	0.179469		FMO2	-0.140708
643365	1.17576	1.61189	2.80175	0.575316	0.565078		LINC00452	0.0161729
100505909	3.41995	-1.61164	1.28295	-1.2562	0.209044		AC139099.5	-0.176197
100422947	1.21087	-1.60987	2.16577	-0.743325	0.457285		MIR3122	-0.0684878
2570	1.19768	-1.60689	2.40072	-0.669339	0.503279		GABRR2	-0.0540205
115701	238.208	1.60628	0.46552	3.45051	0.000559519	0.0291054	ALPK2	0.675871
53919	14.1402	1.6055	0.773302	2.07617	0.0378784	0.353967	SLCO1C1	0.355716
9547	67.7986	-1.60512	0.511774	-3.13638	0.00171046	0.0584836	CXCL14	-0.663824
63940	178.731	-1.60149	0.260459	-6.14874	7.81001e-10	6.56119e-07	GPSM3	-1.20791
390231	0.686761	1.60036	3.09705	0.516737	0.60534		TRIM77	0.0456383
5075	0.463833	1.59945	3.12381	0.512019	0.608637		PAX1	0.0561934
220980	0.947758	1.59899	2.99169	0.534476	0.593012		TMEM72-AS1	0.0147678
84913	17.6479	-1.597	0.700746	-2.279	0.0226673	0.270209	ATOH8	-0.440852
4317	0.46903	1.59594	3.12338	0.510967	0.609374		MMP8	0.0564134
9314	497.259	1.59515	0.759477	2.10033	0.0356996	0.344331	KLF4	0.472638
10894	5.01688	1.59474	1.20824	1.31989	0.186872		LYVE1	0.209144
8277	2.19871	1.5945	1.54387	1.0328	0.301699		TKTL1	0.111673
212	10.0813	-1.59064	0.796833	-1.99621	0.0459114	0.386668	ALAS2	-0.370007
2049	195.327	-1.59021	0.51827	-3.06831	0.00215276	0.0662467	EPHB3	-0.698394
260341	9.76559	-1.58876	1.06006	-1.49875	0.133939	0.595089	TFAMP1	-0.256933
64115	20.0375	-1.58747	0.584043	-2.71807	0.00656648	0.136886	C10orf54	-0.644162
157848	1.13577	1.58574	2.76997	0.572475	0.567		NKX6-3	0.0154878
221395	6.34984	-1.5832	1.41249	-1.12086	0.262347		GPR116	-0.0768985
222642	7.84345	-1.58244	0.988584	-1.60071	0.10944		TSPO2	-0.291537
285692	0.603354	1.58226	3.10598	0.509424	0.610455		CTD-2143L24.1	0.041892
6330	413.739	-1.58163	0.330396	-4.78709	1.69217e-06	0.000394887	SCN4B	-1.07704
81493	2.13784	1.5803	1.78285	0.886389	0.375408		SYNC	0.0837068
388551	0.630611	-1.57574	3.10352	-0.507729	0.611644		CEACAM16	-0.0421254
6860	3440.74	1.57519	0.367874	4.28188	1.85324e-05	0.00246026	SYT4	1.00472
5470	2.02605	1.5744	1.95391	0.805771	0.420375		PPEF2	-0.0217389
284756	0.704721	1.57312	3.09415	0.508419	0.611159		C20orf197	0.0427809
4135	223.924	1.57081	0.316136	4.96878	6.73744e-07	0.000192784	MAP6	1.05137
1745	3.71804	1.57075	1.25385	1.25274	0.2103		DLX1	0.151816
100507629	0.313823	-1.57035	3.13479	-0.500943	0.616411		LINC00658	-0.0374796
820	0.313823	-1.57035	3.13479	-0.500943	0.616411		CAMP	-0.0374796
147409	0.935531	-1.56827	2.57101	-0.60998	0.541875		DSG4	-0.0542757
51200	1.20125	1.56773	2.77907	0.56412	0.572673		CPA4	0.0396217
161753	0.904626	-1.5676	2.59682	-0.60366	0.54607		ODF3L1	-0.0542599
653149	0.420602	-1.56723	3.12972	-0.500758	0.616542		NBPF6	-0.049668
100506907	0.434511	-1.56673	3.12969	-0.500603	0.616651		RP11-71E19.5	-0.049668
23412	78.6853	-1.5663	0.319986	-4.8949	9.83545e-07	0.00026231	COMMD3	-1.04839
406977	0.501452	-1.56613	3.10784	-0.503928	0.614312		MIR199A2	-0.0361315
120939	0.295821	-1.56513	3.1339	-0.499418	0.617485		TMEM52B	-0.0374796
6090	0.295821	-1.56513	3.1339	-0.499418	0.617485		RNY5	-0.0374796
170371	0.313405	-1.56383	3.1337	-0.499037	0.617753		C10orf128	-0.0374796
693189	0.313405	-1.56383	3.1337	-0.499037	0.617753		MIR604	-0.0374796
3593	2.01245	1.56362	1.55091	1.00819	0.313361		IL12B	0.123373
7412	3.39136	-1.56357	1.51833	-1.0298	0.303106		VCAM1	-0.101387
2070	6.91833	-1.56205	0.865787	-1.80419	0.071201		EYA4	-0.354922
8644	136.518	-1.56166	0.308484	-5.06237	4.14071e-07	0.000143347	AKR1C3	-1.08233
768220	0.81264	1.56024	2.72807	0.57192	0.567376		MIR765	0.0400151
375033	49.7399	-1.5585	0.453306	-3.43808	0.000585846	0.0300851	PEAR1	-0.793432
390212	0.295574	-1.55795	3.13271	-0.497317	0.618965		GPR152	-0.0374796
574500	0.672404	1.5578	3.09984	0.502541	0.615287		MIR519A2	0.0454645
26211	0.512816	-1.55749	3.10696	-0.50129	0.616167		OR2F1	-0.0362633
100133234	1.20257	1.55749	2.38502	0.653028	0.513738		SBF1P1	0.0572601
340069	0.512987	-1.55687	3.10685	-0.501107	0.616296		FAM170A	-0.0362981
6349	0.384941	-1.55642	3.12918	-0.49739	0.618914		CCL3L3	-0.049668
115362	0.487713	-1.55519	3.10668	-0.500595	0.616656		GBP5	-0.0376823
8013	62.0352	1.55291	0.586055	2.64977	0.00805459	0.155941	NR4A3	0.635651
100506413	2.59354	1.55102	1.5221	1.019	0.308205		DOCK4-AS1	0.0794517
692206	0.512569	-1.55016	3.10579	-0.499121	0.617694		SNORD90	-0.0364793
280657	0.684159	1.54981	3.08589	0.502224	0.61551		SSX6	0.0264556
284186	2.21267	-1.54979	1.61655	-0.958703	0.337708		TMEM105	-0.0952885
54575	1.00955	-1.54903	3.08156	-0.502678	0.615191		UGT1A10	-0.0281948
80328	1.45396	1.54808	2.04896	0.755547	0.449921		ULBP2	0.067177
284958	1.68896	1.54801	1.8064	0.85696	0.391467		NT5DC4	0.077901
84687	882.425	-1.54796	0.199683	-7.75212	9.03729e-15	3.03689e-11	PPP1R9B	-1.30562
9576	15.078	-1.54744	0.757647	-2.04243	0.0411093	0.367747	SPAG6	-0.342087
727699	0.973823	1.54695	2.65602	0.582429	0.560278		LINC00163	0.0284374
392399	46.5363	1.54684	0.978809	1.58033	0.114032	0.563564	LCN9	0.160149
144124	0.706704	1.54559	3.09803	0.498896	0.617853		OR10A5	0.0469349
100132565	1.13176	-1.54544	2.53251	-0.610238	0.541704		GOLGA8G	-0.00919777
115557	478.989	-1.54489	0.271791	-5.68411	1.31499e-08	8.18316e-06	ARHGEF25	-1.14242
219287	48.8365	1.54473	0.47568	3.2474	0.00116464	0.0469559	AMER2	0.764318
90273	2.30475	-1.54334	2.04548	-0.754511	0.450542		CEACAM21	-0.0312679
1268	740.811	1.54229	0.668379	2.30751	0.0210264	0.257667	CNR1	0.529195
256957	2.62227	-1.54219	1.51756	-1.01622	0.309522		C17orf66	-0.0852752
339390	63.4495	1.54163	0.516312	2.98584	0.00282799	0.0785386	CLEC4G	0.67305
945	3.03929	-1.53918	1.73909	-0.885049	0.37613		CD33	-0.0344113
443	2.41379	1.53906	1.49899	1.02673	0.304545		ASPA	0.0845784
100128811	1.2772	1.53817	2.09645	0.733698	0.463133		GPR158-AS1	0.0594825
58158	1.32414	-1.53626	1.91623	-0.801712	0.42272		NEUROD4	-0.0677959
727677	0.696617	1.53585	3.09773	0.495799	0.620036		CASC8	0.0466752
727837	1.87486	-1.53577	1.90742	-0.805159	0.420728		SSX2	-0.106271
54072	1.13524	-1.53507	2.01966	-0.760067	0.447214		LINC00158	-0.0703887
364	1.70727	-1.53447	1.7544	-0.874638	0.381771		AQP7	-0.0903691
124	0.779337	1.53425	3.08199	0.49781	0.618618		ADH1A	0.0321162
7201	0.946557	-1.5322	2.91751	-0.525172	0.599463		TRHR	-0.0275409
100126317	2.69475	1.53129	1.40322	1.09127	0.275153		MIR374B	0.147733
127670	0.715205	-1.53028	2.53105	-0.604604	0.545442		TEDDM1	-0.04058
56969	0.855828	1.52972	2.65944	0.575204	0.565153		RPL23AP32	0.0469671
339894	1.09055	-1.52969	2.46541	-0.620463	0.534953		LINC00880	-0.0508597
692149	0.78462	1.52794	3.08184	0.495787	0.620045		SCARNA14	0.0180417
163183	489.957	-1.52604	0.281841	-5.41455	6.14434e-08	3.22616e-05	SYNE4	-1.08538
387733	7.08555	1.52578	0.876277	1.74121	0.0816466		IFITM5	0.329919
574033	3.91835	-1.52412	1.3982	-1.09006	0.275688		MIR18B	-0.158054
4212	13.5564	-1.52255	0.874844	-1.74037	0.0817937	0.495957	MEIS2	-0.266869
64240	2.09863	1.52166	1.7779	0.855874	0.392067		ABCG5	0.103374
100133171	4.54171	1.52108	1.39336	1.09166	0.274982		SPANXB2	0.146151
728695	4.54171	1.52108	1.39336	1.09166	0.274982		SPANXB2	0.146151
1103	0.767224	-1.52034	3.0846	-0.492882	0.622096		CHAT	-0.0359829
100422858	0.871997	1.51892	2.63823	0.575736	0.564793		MIR4285	0.0484677
170850	1331.57	1.51868	0.243123	6.24654	4.19652e-10	4.14764e-07	KCNG3	1.1754
57597	63.0215	-1.51845	0.500613	-3.03319	0.00241985	0.0718345	RP11-1055B8.7	-0.708349
100505663	0.886237	1.51775	2.68901	0.564426	0.572464		RP11-101E14.2	0.0272765
9705	1.15182	1.51592	2.40097	0.631377	0.527794		ST18	0.0478181
10877	11.7486	-1.51457	1.15842	-1.30745	0.19106	0.681949	CFHR4	-0.167815
100129027	0.761727	1.51349	2.81546	0.537563	0.590879		AL592528.1	0.0366635
84630	371.612	1.51012	0.463585	3.25748	0.00112407	0.0458875	TTBK1	0.669344
83884	1.54221	1.50799	1.82175	0.827766	0.407803		SLC25A2	0.0682288
80739	4.58906	-1.50763	1.12756	-1.33707	0.1812		C6orf25	-0.225388
100506274	4.6886	-1.50663	1.17488	-1.28237	0.199711		AC013460.1	-0.18032
6799	15.6341	-1.50636	0.624785	-2.411	0.0159089	0.22538	SULT1A2	-0.531852
116135	311.701	1.50609	0.337404	4.46374	8.05409e-06	0.00131383	LRRC3B	0.970775
7652	0.835879	-1.50573	3.11028	-0.484112	0.628306		ZNF99	-0.0656598
7020	21.332	-1.50571	0.751154	-2.00453	0.045013	0.384021	TFAP2A	-0.426224
439915	0.870242	1.50522	3.09644	0.486112	0.626888		KRTAP5-5	0.05143
284576	25.6026	1.50427	0.81438	1.84714	0.064727	0.448102	LEMD1-AS1	0.359167
643529	1.23954	-1.50338	2.40642	-0.624735	0.532145		LINC00865	-0.0546888
648740	3.15802	-1.50269	1.4127	-1.0637	0.287464		AMY2B	-0.158679
8538	0.526238	-1.49942	3.1126	-0.481725	0.630001		BARX2	-0.0367793
319100	0.519455	-1.499	3.11254	-0.481599	0.630091		TAAR6	-0.0364518
644414	0.93403	1.49877	2.97314	0.504104	0.614188		DEFB131	0.0400202
917	0.594994	-1.49868	3.10244	-0.483066	0.629049		CD3G	-0.0422629
158835	0.797586	-1.4984	3.08046	-0.486419	0.62667		AWAT2	-0.0310809
89872	0.516922	-1.49796	3.11292	-0.481207	0.630369		AQP10	-0.0363663
100129461	3.28556	1.49626	1.22406	1.22237	0.221567		RP11-428J1.5	0.166122
222698	14.0147	1.4952	0.95515	1.56541	0.117486	0.568713	NKAPL	0.245805
139420	1.20017	-1.4949	3.08461	-0.484632	0.627937		SMEK3P	-0.0564958
1602	45.3781	-1.49392	0.486484	-3.07085	0.00213447	0.0659254	DACH1	-0.664466
1591	15.0463	1.49333	0.732791	2.03786	0.0415639	0.369664	CYP24A1	0.415689
643832	3.4638	-1.49263	1.36331	-1.09486	0.27358		GAGE10	-0.164026
2213	2.27286	-1.49175	1.5797	-0.944321	0.345006		FCGR2B	-0.0740638
407738	5.84215	1.48931	0.992573	1.50046	0.133496		FAM19A1	0.294898
100507534	1.82941	1.48807	1.88447	0.789648	0.429733		AC140542.2	0.0789666
392392	0.396515	1.48795	3.13009	0.475371	0.634523		OR1K1	0.0478392
285888	9.18016	-1.48795	1.04525	-1.42353	0.154582	0.631461	CNPY1	-0.304382
4973	0.408661	1.48725	3.13005	0.475151	0.63468		OLR1	0.0478392
56955	6.90376	1.48638	0.996437	1.4917	0.135779		MEPE	0.226501
54762	143.519	-1.48602	0.38003	-3.91026	9.21955e-05	0.00806807	GRAMD1C	-0.87308
54212	37.7419	1.48487	0.618074	2.40242	0.016287	0.227287	SNTG1	0.519339
388512	1.23808	-1.48481	3.10404	-0.47835	0.632401		CLEC17A	-0.0681322
100423000	0.52132	1.483	3.10831	0.477107	0.633286		MIR3161	0.0356521
63876	87.6051	-1.48208	0.502116	-2.95167	0.00316057	0.0838923	PKNOX2	-0.558665
126859	6.44499	1.48141	0.959786	1.54348	0.122714		AXDND1	0.285265
343505	0.308906	1.48089	3.13431	0.472478	0.636586		NBPF20	0.0356508
114770	0.3011	1.4806	3.13427	0.472392	0.636647		PGLYRP2	0.0356508
128817	0.3011	1.4806	3.13427	0.472392	0.636647		CSTL1	0.0356508
2703	0.3011	1.4806	3.13427	0.472392	0.636647		GJA8	0.0356508
407044	0.3011	1.4806	3.13427	0.472392	0.636647		MIR7-2	0.0356508
6707	0.288853	1.47913	3.134	0.471961	0.636955		SPRR3	0.0356508
6696	9810.27	1.47879	0.822965	1.79691	0.0723506	0.469937	SPP1	0.32066
100188954	0.482191	1.47859	3.10742	0.475825	0.634199		DNMBP-AS1	0.0348951
56300	1.5525	-1.47836	2.0182	-0.732516	0.463854		IL36G	-0.0513153
135250	0.417822	1.47775	3.12957	0.472188	0.636792		RAET1E	0.0478392
84667	12.145	-1.47746	0.780519	-1.89292	0.0583684	0.429005	HES7	-0.386422
121214	3.07169	-1.4768	1.40891	-1.04818	0.294556		SDR9C7	-0.158901
441317	2.86302	-1.47499	2.09012	-0.705697	0.480377		FAM90A21P	-0.0622209
1581	0.633156	-1.47414	3.09264	-0.476659	0.633605		CYP7A1	-0.0213397
151258	0.285628	1.4737	3.13308	0.470368	0.638092		SLC38A11	0.0356508
136259	1.37327	1.47361	2.13803	0.689236	0.490675		KLF14	0.0367264
594855	41.8186	1.47302	0.566493	2.60024	0.00931582	0.169122	CPLX3	0.589037
400043	5.98123	-1.47237	0.974847	-1.51036	0.130951		RP11-834C11.4	-0.240027
3817	2.31426	-1.47172	1.57227	-0.936046	0.349249		KLK2	-0.101767
7054	2.4919	1.47098	1.59597	0.921683	0.356694		TH	0.138966
29951	13.3533	1.47035	0.772663	1.90296	0.0570459	0.424484	PDZRN4	0.41788
7139	385.842	-1.46988	0.441467	-3.32953	0.000869929	0.0392079	TNNT2	-0.679081
152573	894.969	1.46955	0.390308	3.76511	0.000166476	0.0126567	SHISA3	0.739733
2554	195.75	-1.46949	0.375679	-3.91155	9.17045e-05	0.00806712	GABRA1	-0.935551
3736	63.5594	1.46892	0.370809	3.96138	7.45179e-05	0.00703399	KCNA1	0.89825
3048	3.62792	-1.4688	1.39117	-1.0558	0.291059		HBG2	-0.0765281
10562	0.996517	-1.46839	3.07494	-0.477534	0.632982		OLFM4	-0.0384679
51311	0.498749	-1.46677	3.12226	-0.469778	0.638514		TLR8	-0.0575119
100507377	4.5063	-1.46649	1.19612	-1.22604	0.220182		RP11-81H3.2	-0.189307
340273	2.19939	-1.4653	1.98202	-0.739296	0.459727		ABCB5	-0.0804522
417	0.722842	1.46459	3.09132	0.473777	0.635659		ART1	0.0253572
4133	1779.43	1.46256	0.213901	6.83755	8.05573e-12	1.50392e-08	MAP2	1.21254
127534	14.5076	-1.46166	0.705565	-2.07161	0.0383015	0.355745	GJB4	-0.473622
9248	149.524	-1.46129	0.337528	-4.32939	1.49523e-05	0.00214725	GPR50	-0.9547
916	3.02082	-1.46109	1.52959	-0.955217	0.339468		CD3E	-0.118936
440184	3.14164	1.46056	1.54835	0.943302	0.345526		LINC00238	0.128099
167410	15.9322	-1.45956	0.773718	-1.88642	0.0592382	0.431061	LIX1	-0.38868
1834	1.13329	-1.45952	2.19107	-0.666121	0.505334		DSPP	-0.059184
392843	2.63984	-1.45811	1.60387	-0.909116	0.363289		IQCA1P1	-0.108037
399717	0.613205	-1.45757	3.09207	-0.471389	0.637363		GATA3-AS1	-0.0228151
100240735	0.606423	-1.45718	3.0921	-0.471259	0.637456		RP11-834C11.7	-0.0224469
84795	92.6455	-1.45606	0.457819	-3.18042	0.0014706	0.0526657	PYROXD2	-0.707936
7099	35.8192	-1.45584	0.524655	-2.77485	0.00552272	0.121935	TLR4	-0.664129
54816	870.994	-1.45343	0.945648	-1.53697	0.1243	0.580545	ZNF280D	-0.109502
729041	23.8461	-1.45323	0.531406	-2.73468	0.00624401	0.131634	RP5-1109J22.1	-0.609053
2660	0.512251	-1.45157	3.11398	-0.466147	0.641111		MSTN	-0.0380646
441864	0.512251	-1.45157	3.11398	-0.466147	0.641111		TARM1	-0.0380646
974	96.455	-1.44877	0.365902	-3.95945	7.5124e-05	0.00705158	CD79B	-0.909528
1630	390.02	1.44773	0.46543	3.11052	0.00186761	0.0608868	DCC	0.640306
3965	38.1703	-1.44762	0.474113	-3.05333	0.00226319	0.0687634	LGALS9	-0.699028
50834	0.760109	-1.44685	3.08826	-0.4685	0.639427		TAS2R1	-0.0225174
406958	0.487294	-1.44674	3.11456	-0.464507	0.642284		MIR182	-0.0370127
729574	0.487294	-1.44674	3.11456	-0.464507	0.642284		FAM231A	-0.0370127
4064	0.49442	-1.44575	3.11459	-0.464189	0.642513		CD180	-0.037216
148170	37.1981	-1.4457	0.49774	-2.90454	0.00367798	0.0933496	CDC42EP5	-0.639583
10750	18.2031	-1.44557	0.594615	-2.43111	0.0150526	0.217654	GRAP	-0.568043
83893	34.3633	-1.44552	0.736266	-1.96331	0.0496102	0.397876	SPATA16	-0.520782
2212	22.7117	-1.44422	0.708759	-2.03768	0.0415823	0.369664	FCGR2A	-0.379666
100271849	15.3679	1.44327	0.977372	1.47669	0.139759	0.607092	MEF2B	0.234132
285780	0.423463	-1.44318	3.13095	-0.46094	0.644841		LY86-AS1	-0.049668
646698	1.5778	1.44288	1.68579	0.855907	0.392049		ZSCAN5D	0.103035
8633	246.724	1.44163	0.34116	4.22567	2.38228e-05	0.00299074	UNC5C	0.886951
440896	1.80617	-1.44146	1.63003	-0.884316	0.376525		RP11-561O23.5	-0.102554
642976	0.962321	-1.4402	3.08349	-0.46707	0.64045		GRIK1-AS1	-0.0537589
339145	13.0791	1.4396	0.715482	2.01207	0.0442129	0.380372	FAM92B	0.431618
100499484	141.86	1.43878	0.322883	4.45603	8.34909e-06	0.00133601	RP11-23J9.5	0.94982
257202	0.880333	-1.43848	3.07861	-0.467249	0.640322		GPX6	-0.0362691
100130342	0.843024	1.43837	3.07837	0.467252	0.64032		SCGB2B3P	0.033761
2938	6.11275	-1.4375	1.08038	-1.33055	0.183336		GSTA2	-0.265366
9381	25.3199	-1.43736	0.696935	-2.06239	0.0391703	0.360538	OTOF	-0.508561
6274	3.36514	1.43705	1.46823	0.978761	0.327698		S100A3	0.086991
3140	10.286	-1.43641	0.780453	-1.84049	0.0656969	0.451468	MR1	-0.34814
9630	1338.69	1.4364	0.287764	4.99159	5.98833e-07	0.000179671	GNA14	1.00892
1369	10.0466	-1.43612	1.04199	-1.37824	0.16813	0.652406	CPN1	-0.199776
80117	0.617875	-1.43505	3.10392	-0.462336	0.64384		ARL14	-0.0427584
51327	46.4789	-1.43384	0.45936	-3.12138	0.00180003	0.060106	AHSP	-0.709177
84249	30.3041	-1.43381	0.57562	-2.4909	0.012742	0.201743	PSD2	-0.524758
645638	23.4838	-1.43318	0.787273	-1.82044	0.0686926	0.460962	CTD-2319I12.1	-0.359889
219621	2.31509	-1.43275	1.98005	-0.723591	0.469317		C10orf107	-0.0152558
22891	105.297	1.43106	0.39063	3.66347	0.000248823	0.0165246	ZNF365	0.790179
57817	2.07455	-1.43039	1.66928	-0.856889	0.391506		HAMP	-0.113725
375686	26.5826	1.43026	0.503337	2.84155	0.00448945	0.10727	SPATC1	0.653885
27286	0.552756	-1.42769	3.11873	-0.457779	0.647112		SRPX2	-0.0602534
440823	13646	1.42754	0.22422	6.3667	1.93135e-10	2.31789e-07	MIAT	1.14292
5671	0.55971	-1.42734	3.11868	-0.457673	0.647187		PSG3	-0.0604819
677816	0.566203	-1.42633	3.10291	-0.459676	0.645749		SNORA35	-0.0433399
84793	6.74974	-1.42504	1.15388	-1.235	0.216831		FOXD2-AS1	-0.140581
147429	24.195	1.42461	0.740995	1.92257	0.0545347	0.415176	AQP4-AS1	0.386849
79908	11.9783	-1.42183	0.911935	-1.55913	0.118965	0.571426	BTNL8	-0.227793
375612	86.4451	1.42179	0.44745	3.17753	0.00148536	0.0526657	LHFPL3	0.67757
1046	54.9704	-1.421	0.453295	-3.13483	0.00171955	0.0585907	CDX4	-0.638496
649	253.651	-1.42082	0.265633	-5.34878	8.85471e-08	4.28537e-05	BMP1	-1.06691
201516	6.03637	-1.42001	1.11584	-1.27259	0.203162		ZSCAN4	-0.248182
55897	4.98891	-1.41954	1.04394	-1.3598	0.173893		MESP1	-0.250946
259289	5.34316	1.41934	1.09775	1.29296	0.196025		TAS2R43	0.194051
51289	10.8515	1.41863	0.831779	1.70554	0.0880938	0.511802	RXFP3	0.325862
400940	15.2391	1.41846	0.700922	2.0237	0.0430009	0.375911	LINC01105	0.399092
100422989	0.619188	1.41831	3.10257	0.457139	0.647571		MIR3155A	0.042337
283471	0.60318	-1.41786	3.09685	-0.45784	0.647068		TMPRSS12	-0.0223964
6286	1.65324	-1.41767	1.93201	-0.733778	0.463084		S100P	-0.0564164
64641	2.56125	-1.41661	2.09378	-0.67658	0.498672		EBF2	-0.0382453
151651	31.9161	-1.41467	0.453264	-3.12107	0.00180197	0.060106	EFHB	-0.71206
677780	0.495194	1.41262	3.11168	0.453975	0.649847		SCARNA11	0.0340472
1576	6.54437	-1.41234	1.04272	-1.35448	0.175583		CYP3A4	-0.25511
7366	4.60397	1.41177	1.39228	1.014	0.310584		UGT2B15	0.129
54738	0.764522	1.41163	2.76645	0.510266	0.609865		FEV	0.0396959
85397	10.2623	1.4115	0.965398	1.46209	0.143716	0.612696	RGS8	0.307013
255480	2.44987	1.41125	1.62952	0.866054	0.38646		TBX5-AS1	0.110624
84436	598.249	1.41046	0.704538	2.00196	0.0452887	0.384702	ZNF528	0.287697
643418	1.49264	-1.40927	2.99803	-0.470066	0.638308		LIPN	-0.0072149
6258	2.06437	1.4075	2.6253	0.536129	0.591869		RXRG	0.0759722
177	247.881	-1.40731	0.29673	-4.74273	2.1086e-06	0.000472383	AGER	-0.992818
286083	1.20668	-1.40713	2.13312	-0.659659	0.509473		CTD-2281E23.1	-0.0673642
9971	0.648195	-1.40508	3.10097	-0.453112	0.650468		NR1H4	-0.0424314
90139	1317.31	-1.40475	0.364808	-3.85066	0.000117798	0.00998614	TSPAN18	-0.848102
23209	6.08935	-1.4046	0.973301	-1.44313	0.148983		MLC1	-0.245623
652	273.67	-1.40447	0.407911	-3.44309	0.000575117	0.0297327	BMP4	-0.6922
2652	0.445559	-1.40444	3.12658	-0.449193	0.653292		OPN1MW	-0.049668
171022	2.18405	1.40415	1.59023	0.882985	0.377245		LINC00035	0.0682288
3087	46.0651	-1.40305	0.473709	-2.96183	0.00305813	0.0827963	HHEX	-0.661172
10351	1.27435	-1.40296	2.34268	-0.59887	0.549259		ABCA8	-0.04846
3598	1.35049	1.40217	2.04372	0.686086	0.492659		IL13RA2	0.0850947
158471	5722.46	1.40148	0.142269	9.85088	6.79458e-23	5.70813e-19	PRUNE2	1.28111
9976	0.69832	1.40101	2.88707	0.485272	0.627484		CLEC2B	0.0322045
80343	0.893663	-1.40096	2.64089	-0.530487	0.595774		SEL1L2	-0.0328242
4188	1273	-1.4009	0.281992	-4.96786	6.7696e-07	0.000192784	MDFI	-1.02907
100506834	2.04605	1.40042	1.75388	0.798467	0.424599		RP11-276H19.1	0.0940619
2533	1.25917	1.39996	2.0771	0.673999	0.500312		FYB	0.0749821
729723	3.21995	1.39963	1.20607	1.16048	0.245852		DNAJC27-AS1	0.171996
10332	0.591482	-1.39608	3.10511	-0.449606	0.652995		CLEC4M	-0.0449579
1469	80.1055	-1.39608	0.525072	-2.65883	0.00784129	0.153197	CST1	-0.686783
83446	0.647776	-1.39596	3.0997	-0.450352	0.652457		CCDC70	-0.0424189
50939	3.69114	1.39582	1.28732	1.08428	0.278239		IMPG2	0.0890444
100132979	1.71377	1.39575	1.89769	0.735498	0.462036		GOLGA8EP	0.0905646
100126313	1.06356	1.39551	2.46183	0.566861	0.570809		MIR744	0.046779
693148	3.47271	1.39547	1.25239	1.11424	0.265175		MIR563	0.134548
55806	3.38463	1.39402	1.50617	0.925539	0.354686		HR	0.0704617
401546	2.18693	-1.39371	1.68911	-0.825118	0.409304		C9orf152	-0.0621542
57626	0.630891	1.39354	3.09291	0.450559	0.652308		KLHL1	0.0184601
1439	1.06813	-1.39264	2.8518	-0.488338	0.625311		CSF2RB	-0.0468599
4261	3.37479	-1.39175	1.33112	-1.04554	0.295772		CIITA	-0.123466
151531	1.37805	-1.38948	2.07322	-0.670204	0.502728		UPP2	-0.0853516
8829	1299.56	1.38874	0.615359	2.2568	0.0240206	0.278943	NRP1	0.510254
1544	0.644722	-1.38867	3.10424	-0.447347	0.654625		CYP1A2	-0.0436346
84830	12.7791	1.38698	0.806443	1.71988	0.0854549	0.504502	ADTRP	0.273263
56253	6.78655	1.38634	1.14375	1.2121	0.225474		CRTAM	0.0927648
1142	0.511366	1.38537	3.12269	0.443647	0.657298		CHRNB3	0.0579991
440556	1.97693	1.38524	1.84807	0.749557	0.453521		LINC00982	0.0109449
4648	2.41386	1.38519	1.49861	0.924317	0.355321		MYO7B	0.127685
135935	0.870623	1.38461	3.10553	0.445853	0.655703		NOBOX	0.0656879
6469	1.36682	-1.38285	2.01323	-0.686884	0.492156		SHH	-0.0718188
388595	32.7143	-1.38264	0.594514	-2.32566	0.0200365	0.252743	TMEM82	-0.517844
51286	322.293	1.38195	0.415593	3.32525	0.000883395	0.0395808	CEND1	0.680633
149708	0.954692	-1.3818	2.29157	-0.60299	0.546515		WFDC5	-0.0326908
3142	11.6609	-1.38077	0.741422	-1.86233	0.062557	0.44256	HLX	-0.362155
9182	22.5917	-1.37907	0.701089	-1.96704	0.0491783	0.397065	RASSF9	-0.294577
50614	95.441	1.37798	0.598747	2.30144	0.0213666	0.260334	GALNT9	0.520638
283298	9.09658	-1.37629	0.913557	-1.50652	0.131933	0.592393	OLFML1	-0.22975
1517	30.6523	-1.37592	0.53608	-2.56662	0.0102694	0.178251	CTSLP7	-0.566167
158983	8.18008	1.37564	0.958926	1.43456	0.151412		H2BFWT	0.256692
619434	0.89573	-1.37538	2.65816	-0.517419	0.604864		LINC00051	-0.0335145
4778	70.2631	-1.37452	0.425617	-3.22947	0.00124018	0.0485724	NFE2	-0.740136
4239	813.237	1.37433	0.24863	5.52761	3.24615e-08	1.81806e-05	MFAP4	1.04586
64108	1.62144	1.37293	2.16675	0.633638	0.526317		RTP4	0.0833575
51278	802.55	-1.37215	0.326285	-4.20538	2.60644e-05	0.00320984	IER5	-0.878879
693233	0.486994	1.37172	3.11284	0.440665	0.659456		MIR648	0.0340645
85569	0.900365	1.37093	2.6392	0.51945	0.603447		GALP	0.0319507
282770	1.67421	-1.36982	2.37294	-0.577265	0.563761		OR10AG1	-0.0621808
712	1.28188	1.36938	3.02022	0.453404	0.650258		C1QA	0.0294582
6476	0.591307	1.36891	3.115	0.439457	0.66033		SI	0.0611493
392196	0.887127	1.36879	3.08477	0.443726	0.657241		RP11-1236K1.8	0.0505684
116	0.735982	1.3684	3.09238	0.442507	0.658122		ADCYAP1	0.0457729
677833	1.53101	1.36786	1.80959	0.755894	0.449713		SNORA54	0.0602228
9383	6.96749	-1.36697	1.07159	-1.27564	0.202082		TSIX	-0.11119
644444	0.491575	1.36651	3.11337	0.438915	0.660723		TMEM30C	0.0347051
677784	0.35183	1.36559	3.13195	0.436019	0.662823		FAM138B	0.0467096
83795	1.89289	1.36527	1.56733	0.871081	0.38371		KCNK16	0.118306
1816	17.2636	1.36527	0.661607	2.06356	0.0390594	0.359997	DRD5	0.392585
246744	0.69221	1.36509	3.09441	0.441146	0.659107		STH	0.0455114
85329	72.4751	1.36361	0.573818	2.37638	0.0174833	0.237267	LGALS12	0.610068
1071	1.253	1.36319	2.15886	0.63144	0.527753		CETP	0.0661495
122664	2.31988	-1.36312	1.6392	-0.831576	0.405648		TPPP2	-0.0335068
3047	2.32364	-1.36287	1.60345	-0.849964	0.395345		HBG1	-0.0558859
150568	1.87348	-1.36146	1.89775	-0.717407	0.473123		LINC01102	-0.0440287
6718	13.0749	1.35981	0.890305	1.52736	0.126672	0.584416	AKR1D1	0.292506
100507435	0.568825	1.35847	3.10494	0.43752	0.661734		RP11-666I19.2	0.0379396
286133	11.2041	-1.35784	0.922834	-1.47138	0.141189	0.609343	SCARA5	-0.306826
729444	1.2676	1.35473	2.62248	0.516585	0.605446		XXbac-B33L19.3	0.0486807
100132831	0.775246	1.3547	3.0874	0.438784	0.660818		RP11-169L17.5	0.0479217
89795	487.503	1.35467	0.382108	3.54524	0.000392254	0.0230959	NAV3	0.764012
285401	668.465	-1.35323	0.308969	-4.37984	1.18767e-05	0.0017868	LINC00698	-0.875869
345557	43.5451	1.35293	0.467007	2.89703	0.0037671	0.0946064	PLCXD3	0.678813
680	0.587882	1.35277	3.10422	0.435786	0.662992		BRS3	0.0415596
1755	8.02492	1.3526	1.09752	1.23241	0.217795		DMBT1	0.152569
9103	4.13164	-1.35242	1.2181	-1.11027	0.266884		FCGR2C	-0.121227
54757	410.077	1.35214	0.445329	3.03627	0.00239526	0.0714835	FAM20A	0.640403
80868	1.69194	1.35172	2.04004	0.662594	0.507591		HCG4B	0.0373105
7137	422.839	-1.35149	0.774767	-1.74438	0.0810934	0.493859	TNNI3	-0.104304
55532	97.9027	1.34951	0.342725	3.93759	8.23036e-05	0.00751557	SLC30A10	0.870115
64284	3443.51	-1.34842	0.745794	-1.80803	0.0706011	0.465919	RAB17	-0.220545
80320	107.896	-1.34698	0.297135	-4.53321	5.8094e-06	0.0010384	SP6	-0.95342
83890	5.05921	-1.34664	1.25451	-1.07344	0.283075		SPATA9	-0.179709
399815	14.5924	-1.34643	0.82031	-1.64137	0.10072	0.542209	RP11-564D11.3	-0.420408
7849	1.25661	1.34639	2.40454	0.559937	0.575523		PAX8	0.0256428
11317	65.6361	1.34606	0.429092	3.13699	0.00170691	0.0584836	RBPJL	0.768397
126	0.307288	-1.34582	3.13908	-0.428729	0.66812		ADH1C	-0.0374796
347527	0.307288	-1.34582	3.13908	-0.428729	0.66812		ARSH	-0.0374796
400511	2.81515	1.34574	1.67835	0.801822	0.422656		AC012317.1	0.0772997
5918	30.274	1.34565	0.481422	2.79516	0.00518743	0.116835	RARRES1	0.632801
282617	0.693964	1.34538	2.88651	0.466093	0.641149		IFNL3	0.0308449
2769	72.7845	1.34482	0.519777	2.58729	0.00967334	0.172906	GNA15	0.625464
7080	0.324871	-1.34481	3.1392	-0.428393	0.668365		NKX2-1	-0.0374796
4318	307.59	-1.34355	0.46417	-2.89453	0.00379728	0.0949433	MMP9	-0.703329
100505893	0.5918	1.34353	3.09223	0.434485	0.663937		SLIT2-IT1	0.0219235
64805	3.23741	1.3426	1.35427	0.991384	0.321498		P2RY12	0.0914649
128954	8.41795	1.34248	1.19068	1.12748	0.259538		GAB4	0.0542093
117286	0.502822	1.34172	3.11868	0.430219	0.667036		CIB3	0.0568508
8321	173.586	-1.34123	0.302576	-4.43269	9.30628e-06	0.00146135	FZD1	-0.938809
100132596	1.00903	1.34103	2.84408	0.471516	0.637272		XG	0.0454838
30835	6.0623	-1.3405	1.10993	-1.20773	0.227151		CD209	-0.211023
10736	28.1931	-1.34009	0.57522	-2.32971	0.0198216	0.251969	SIX2	-0.479459
692111	1.38248	1.33988	1.86947	0.716718	0.473548		SNORD71	0.0503441
10538	0.289285	-1.33984	3.13814	-0.426954	0.669413		BATF	-0.0374796
406915	0.602223	1.33951	3.10273	0.431721	0.665944		MIR128-1	0.0410445
283129	1.08309	1.3385	2.24059	0.597389	0.550248		C11orf85	0.0516998
146779	1.73488	1.33746	1.75391	0.762557	0.445728		EFCAB3	0.0678199
406938	0.324452	-1.33737	3.13803	-0.42618	0.669976		MIR146A	-0.0374796
100132417	1.10273	-1.33714	2.85889	-0.467712	0.639991		FCGR1B	-0.0377802
253017	0.331407	-1.33707	3.13798	-0.426091	0.670042		TECRL	-0.0374796
677763	0.331407	-1.33707	3.13798	-0.426091	0.670042		SCARNA21	-0.0374796
100302155	0.324624	-1.33666	3.13791	-0.42597	0.670129		MIR1256	-0.0374796
11254	0.324624	-1.33666	3.13791	-0.42597	0.670129		SLC6A14	-0.0374796
124912	0.324624	-1.33666	3.13791	-0.42597	0.670129		SPACA3	-0.0374796
729230	0.324624	-1.33666	3.13791	-0.42597	0.670129		CCR2	-0.0374796
154089	1.493	1.33577	2.09313	0.638167	0.523365		RP4-662A9.2	0.0478372
728655	1.31571	-1.33454	2.09459	-0.637136	0.524036		HULC	-0.0756601
399881	0.302776	-1.33383	3.13871	-0.424963	0.670864		HNRNPKP3	-0.0374796
6704	0.302776	-1.33383	3.13871	-0.424963	0.670864		SPRR2E	-0.0374796
151449	4.6505	-1.3338	1.64514	-0.810751	0.417509		GDF7	-0.143419
837	2.54105	-1.33319	1.44696	-0.921374	0.356855		CASP4	-0.101642
692107	0.30645	-1.33291	3.13851	-0.424696	0.671058		SNORD66	-0.0374796
163479	241.789	1.33267	0.337283	3.9512	7.77601e-05	0.00721837	FNDC7	0.862993
57214	423.381	1.33267	0.322728	4.12939	3.63733e-05	0.00412935	KIAA1199	0.912424
149563	0.320359	-1.33237	3.13849	-0.424526	0.671183		C1orf64	-0.0374796
401124	0.320359	-1.33237	3.13849	-0.424526	0.671183		DTHD1	-0.0374796
51744	0.320359	-1.33237	3.13849	-0.424526	0.671183		CD244	-0.0374796
3783	110.652	1.33205	0.317493	4.19553	2.72232e-05	0.00331452	KCNN4	0.884045
10563	0.306794	-1.33164	3.13845	-0.424297	0.67135		CXCL13	-0.0374796
57084	177.68	1.33157	0.328164	4.05763	4.95736e-05	0.00527174	SLC17A6	0.872022
1382	2858.83	-1.3309	0.178178	-7.46953	8.04819e-14	1.69032e-10	CRABP2	-1.15716
57758	97.4713	1.33087	0.381551	3.48806	0.00048653	0.0265412	SCUBE2	0.781567
100302223	1.16644	-1.33078	2.81459	-0.472816	0.636344		MIR1302-8	-0.0219143
3174	326.959	1.33039	0.235327	5.65336	1.57343e-08	9.44167e-06	HNF4G	1.05817
1559	2.41805	-1.33026	2.15853	-0.616279	0.537711		CYP2C9	-0.105314
4295	5.78025	1.32976	1.15883	1.1475	0.251175		MLN	0.114658
56157	1.10226	-1.3284	2.18935	-0.606756	0.544013		TEX13A	-0.0614024
100505676	12.5355	1.32801	0.718088	1.84938	0.0644036	0.446937	RP11-346I3.4	0.396144
1807	56.0993	1.328	0.587055	2.26215	0.0236883	0.276919	DPYS	0.442266
100144597	0.505543	-1.32699	3.11076	-0.426582	0.669684		LINC01056	-0.0377966
554235	10.6081	-1.32643	0.815518	-1.62649	0.103845	0.54898	ASPDH	-0.327401
389558	0.28862	-1.32616	3.13745	-0.422688	0.672523		FAM180A	-0.0374796
100302159	0.398247	1.3257	3.12765	0.423863	0.671666		MIR548F3	0.0478392
84366	0.398247	1.3257	3.12765	0.423863	0.671666		PRAC1	0.0478392
654502	0.302529	-1.32561	3.13743	-0.422516	0.672648		IQCJ	-0.0374796
100422992	0.295746	-1.32529	3.13746	-0.422407	0.672728		MIR3151	-0.0374796
11148	0.295746	-1.32529	3.13746	-0.422407	0.672728		HHLA2	-0.0374796
646576	8.51739	1.32451	0.907528	1.45947	0.144436		HHIP-AS1	0.284363
100126784	61.1218	1.32441	0.342047	3.87202	0.000107938	0.00934833	RP11-359E10.1	0.84869
51313	10.9418	-1.32107	1.07956	-1.22372	0.221059	0.713465	FAM198B	-0.243074
56670	0.37931	1.32099	3.12675	0.422481	0.672674		SUCNR1	0.0478392
100131138	530.439	-1.31889	0.445915	-2.95771	0.0030993	0.0830996	RP1-46F2.2	-0.555522
386746	0.895908	1.31788	2.66726	0.494093	0.621241		MRGPRG	0.0453829
693134	0.384507	1.31719	3.12638	0.421316	0.673524		MIR550A2	0.0478392
203190	2.23127	-1.31674	2.01128	-0.654676	0.512677		LGI3	-0.11512
440021	0.512397	-1.31635	3.11028	-0.423224	0.672132		KRTAP5-2	-0.0356855
79015	8.39787	-1.31558	1.1086	-1.18671	0.235342		RP11-445H22.3	-0.175344
390259	1.15876	-1.31376	2.41972	-0.542942	0.58717		BSX	-0.0370909
29895	33.4642	-1.31322	0.571818	-2.29658	0.0216429	0.262559	MYLPF	-0.41674
399829	1.84051	1.31224	1.92467	0.681797	0.495368		LINC01168	0.0521879
146754	28.8031	-1.31163	0.528469	-2.48195	0.0130667	0.20415	DNAH2	-0.583383
641516	183.523	-1.31088	0.518615	-2.52765	0.011483	0.188048	RP11-142I20.1	-0.428415
339906	4.90717	1.30859	1.34866	0.970294	0.3319		PRSS42	0.101021
1800	151.431	-1.30621	0.341432	-3.82567	0.000130415	0.0107414	DPEP1	-0.861163
138715	10.1621	-1.30574	0.776254	-1.6821	0.0925491	0.52164	ARID3C	-0.373103
2917	23.0906	1.30559	0.609123	2.14339	0.0320817	0.323358	GRM7	0.513652
401093	25.1125	1.30462	0.611505	2.13346	0.0328872	0.327741	MBNL1-AS1	0.414258
285148	306.145	-1.30382	0.478614	-2.72415	0.00644672	0.13486	IAH1	-0.396895
1406	2.81875	-1.3031	1.47939	-0.880833	0.378408		CRX	-0.0715172
153910	2.80617	1.30301	1.59525	0.816801	0.414042		RP11-440G9.1	0.0653217
684	1697.32	-1.30262	0.584239	-2.22961	0.0257735	0.289276	BST2	-0.518441
58189	57.6113	1.30262	0.541913	2.40374	0.0162283	0.227034	WFDC1	0.561192
1232	1.21028	1.30261	2.7189	0.479095	0.631871		CCR3	0.0539817
100506869	0.920043	-1.30184	2.61103	-0.498591	0.618068		RP11-362K2.2	-0.0308344
341392	2.00283	-1.30147	2.34199	-0.555711	0.578408		ACSM4	-0.061759
65217	36.8172	1.3013	0.630824	2.06286	0.0391261	0.360415	PCDH15	0.447655
728441	3.7145	-1.30064	1.14797	-1.13299	0.257217		GGT1	-0.184197
338651	7.15201	1.30033	1.03135	1.26081	0.207379		KRTAP5-AS1	0.222792
11035	9.41315	1.29991	0.811695	1.60148	0.109272	0.557904	RIPK3	0.320102
9754	407.206	-1.29958	0.289053	-4.49599	6.92477e-06	0.00117525	STARD8	-0.936095
100505817	429.073	1.29939	1.09804	1.18338	0.236659	0.724438	CTD-2354A18.1	0.289753
54855	75.1066	-1.29906	0.317108	-4.09658	4.19294e-05	0.00457129	FAM46C	-0.878645
6442	10.4651	-1.2984	0.905695	-1.4336	0.151687	0.626202	SGCA	-0.245025
6492	17.8586	-1.29792	0.6793	-1.91067	0.0560464	0.419836	SIM1	-0.451876
1910	5174.26	1.29739	1.23527	1.05028	0.293587	0.777839	EDNRB	0.234425
222659	5.67632	-1.29623	0.991218	-1.30771	0.190972		PXT1	-0.213295
7471	0.796085	1.29551	2.73046	0.474464	0.635169		WNT1	0.0392445
3562	0.584942	-1.29488	3.10905	-0.416486	0.677054		IL3	-0.0400699
4330	528.863	-1.29377	0.256379	-5.04632	4.50405e-07	0.000147361	MN1	-0.98487
283867	2.2324	1.29361	1.65442	0.781908	0.434268		LINC00922	0.0578065
64581	7.70525	1.29313	1.12743	1.14697	0.251396		CLEC7A	0.127816
100423012	1.76408	1.29219	1.59356	0.810884	0.417432		MIR3177	0.102683
150244	21.2511	-1.29092	0.633109	-2.03902	0.0414477	0.368976	ZDHHC8P1	-0.446649
799	528.89	1.28804	0.697544	1.84653	0.0648152	0.448159	CALCR	0.444766
147660	1653.58	1.28758	0.361612	3.56066	0.000369917	0.0222059	ZNF578	0.746882
375295	39.7316	1.28634	0.628043	2.04817	0.0405435	0.366308	LINC01116	0.381035
100506126	1.83136	1.28626	1.73071	0.743198	0.457362		LINC00867	0.0554314
51214	3.09216	1.28419	1.52282	0.843298	0.399062		IGF2-AS	0.132085
343263	8.61234	-1.28372	0.955158	-1.34398	0.178954		MYBPHL	-0.268888
5742	217.721	-1.28273	0.300683	-4.26606	1.98959e-05	0.00261165	PTGS1	-0.927516
2854	0.950145	-1.28268	2.57707	-0.497731	0.618674		GPR32	-0.0402935
4501	3195.69	1.28261	0.754664	1.69957	0.0892113	0.514703	MT1X	0.361881
100507506	9.93983	1.28213	0.820273	1.56305	0.118041	0.569033	RP3-400B16.1	0.273202
93986	12.2857	-1.28187	0.735258	-1.74343	0.0812593	0.494322	FOXP2	-0.312658
442028	3.79406	1.2811	1.44367	0.887391	0.374868		AC097374.2	0.107863
8038	53.546	1.28092	0.451977	2.83403	0.00459653	0.108215	ADAM12	0.680379
643406	1.20443	-1.27981	2.41797	-0.529289	0.596605		RP5-828H9.1	-0.021822
6532	21.4981	1.27966	0.523519	2.44434	0.0145118	0.213258	SLC6A4	0.551038
5268	10.4672	-1.27947	1.08732	-1.17672	0.239308	0.727867	SERPINB5	-0.152021
79148	1.56909	1.27862	1.8219	0.701804	0.482801		MMP28	0.0691124
100130111	49.5016	-1.27667	0.418521	-3.05043	0.00228517	0.069181	RP11-680F8.1	-0.679792
256297	1.09344	1.27655	2.49952	0.510718	0.609549		PTF1A	0.0220771
5746	72.4434	1.27591	0.401683	3.1764	0.00149116	0.0527462	PTH2R	0.729512
200959	1.38127	-1.27573	2.93715	-0.434342	0.66404		GABRR3	-0.0331216
147741	566.464	1.2751	1.0012	1.27358	0.202812	0.694427	ZNF560	0.000910967
277	7.7873	-1.2723	0.996954	-1.27619	0.20189		AMY1A	-0.213168
2358	9.97878	-1.27145	0.807393	-1.57475	0.115313	0.564339	FPR2	-0.326417
6375	14.2067	-1.27137	0.82511	-1.54085	0.123353	0.58001	XCL1	-0.298105
100128055	3.89865	1.27077	1.09696	1.15845	0.246681		SMARCA5-AS1	0.196206
4496	645.993	1.27059	1.01809	1.24801	0.212026	0.704752	MT1H	0.221462
9148	72.0374	1.27039	0.512396	2.47931	0.0131637	0.204414	NEURL1	0.571901
162699	1.62141	-1.26953	1.80906	-0.701763	0.482827		TCEB3C	-0.0973953
4900	24.4367	-1.26739	0.544028	-2.32964	0.0198252	0.251969	NRGN	-0.511957
777	250.876	1.26738	0.23971	5.28714	1.24241e-07	5.35256e-05	CACNA1E	1.00159
23135	471.829	-1.26738	0.247173	-5.1275	2.93618e-07	0.000112122	KDM6B	-0.998018
400794	1.10199	1.26734	2.78074	0.455755	0.648566		RP11-280O1.2	0.0517765
100507560	13.8637	-1.2673	0.829819	-1.52719	0.126713	0.584416	RP11-429A20.4	-0.4155
27319	1.48329	1.26676	2.57211	0.492497	0.622368		BHLHE22	0.045046
2741	3.18015	-1.26571	1.31236	-0.96446	0.334815		GLRA1	-0.126435
80309	7.47901	1.26519	0.944161	1.34001	0.180242		SPHKAP	0.248111
341405	21.9468	-1.26515	0.788751	-1.60399	0.108716	0.557904	ANKRD33	-0.318892
3903	8.29714	-1.26482	1.18261	-1.06951	0.284839		LAIR1	-0.0686298
1444	2.17012	1.26381	2.08168	0.607112	0.543777		CSH1	0.104949
8547	15.0139	-1.26347	0.716869	-1.76248	0.077988	0.486037	FCN3	-0.338195
26810	0.893156	-1.26314	3.05606	-0.413323	0.67937		SNORD41	-0.0222374
257203	2.19983	1.26288	1.69022	0.747167	0.454963		DSCR9	0.048984
728927	311.684	1.26078	0.396305	3.18135	0.00146589	0.0526657	ZNF736	0.685191
140689	5.28851	1.25876	2.01634	0.624279	0.532444		CBLN4	0.120384
170063	3.90386	1.25798	1.24579	1.00978	0.312598		CXorf22	0.13641
387332	1.2479	1.25786	2.65043	0.474589	0.63508		TBPL2	0.0479772
2897	32.9568	1.25756	0.476163	2.64102	0.00826568	0.158539	GRIK1	0.588246
100128023	1.11183	1.25755	2.45974	0.511254	0.609173		DPPA2P2	0.024208
100505685	1.57169	1.25748	1.8559	0.677557	0.498053		RP11-73G16.1	0.0464602
340419	92.8231	1.25673	0.347822	3.61314	0.000302515	0.0191806	RSPO2	0.792748
100126355	0.306058	1.25542	3.13883	0.399964	0.689183		MIR365A	0.0356508
100422880	0.306058	1.25542	3.13883	0.399964	0.689183		MIR3162	0.0356508
2535	1560.02	-1.25533	0.363642	-3.4521	0.000556236	0.0290245	FZD2	-0.63933
120425	18.7867	-1.2552	0.767293	-1.63588	0.101865	0.544855	AMICA1	-0.295567
286186	0.312131	1.2551	3.13887	0.399858	0.689261		CTD-3025N20.2	0.0356508
4490	0.298252	1.25509	3.13878	0.399865	0.689256		MT1B	0.0356508
124056	139.506	1.25489	0.340345	3.68711	0.000226811	0.0156826	NOXO1	0.792928
100126343	0.29652	1.25454	3.13884	0.399683	0.68939		MIR874	0.0356508
8876	0.29652	1.25454	3.13884	0.399683	0.68939		VNN1	0.0356508
100302270	0.310398	1.25432	3.13875	0.399625	0.689433		MIR1305	0.0356508
100507056	0.310398	1.25432	3.13875	0.399625	0.689433		CCAT1	0.0356508
100101121	0.302593	1.25409	3.13877	0.399549	0.689489		TTTY23B	0.0356508
252955	0.302593	1.25409	3.13877	0.399549	0.689489		TTTY23B	0.0356508
27302	0.302593	1.25409	3.13877	0.399549	0.689489		BMP10	0.0356508
3238	0.302593	1.25409	3.13877	0.399549	0.689489		HOXD12	0.0356508
886	0.302593	1.25409	3.13877	0.399549	0.689489		CCKAR	0.0356508
115361	1.57392	-1.25384	2.23623	-0.560693	0.575007		GBP4	-0.0358314
54538	3.21503	-1.25336	1.33092	-0.941719	0.346336		ROBO4	-0.118342
222	5.13409	1.25254	1.21902	1.02749	0.304189		ALDH3B2	0.244535
204801	20.8984	1.25209	0.821453	1.52424	0.127448	0.585598	NLRP11	0.263402
94160	3.71258	-1.25123	1.26579	-0.988492	0.322912		ABCC12	-0.0979901
387720	26.1358	-1.25082	0.558537	-2.23946	0.0251258	0.285632	AL391005.1	-0.494256
2587	105.132	1.25026	0.599663	2.08494	0.0370747	0.349372	GALR1	0.417289
100422737	0.302832	1.24921	3.13784	0.398111	0.690549		RP1-60O19.1	0.0356508
100422841	0.302832	1.24921	3.13784	0.398111	0.690549		MIR3174	0.0356508
135644	0.302832	1.24921	3.13784	0.398111	0.690549		TRIM40	0.0356508
286365	0.302832	1.24921	3.13784	0.398111	0.690549		OR13D1	0.0356508
441056	0.760537	-1.2491	3.07869	-0.405724	0.684945		DUX4L4	-0.0348074
338376	5.84109	1.2491	1.04533	1.19493	0.232113		IFNE	0.194987
693163	0.314979	1.24843	3.1378	0.397869	0.690727		MIR578	0.0356508
728495	0.314979	1.24843	3.1378	0.397869	0.690727		FAM74A3	0.0356508
474381	2.54499	-1.24804	1.65064	-0.756098	0.449591		H2AFB2	-0.0464293
10816	0.299368	1.24787	3.13778	0.397692	0.690857		SPINT3	0.0356508
693139	0.523052	1.24771	3.1117	0.400974	0.688439		MIR554	0.0351583
70	3947	1.24714	0.332539	3.75034	0.000176595	0.0132977	ACTC1	0.782424
254956	0.513514	1.24682	3.11171	0.400686	0.688652		MORN5	0.0348238
401172	0.713582	-1.24668	3.10384	-0.401656	0.687937		CTD-2324F15.2	-0.0465473
51338	0.281048	1.2466	3.13757	0.397315	0.691135		MS4A4A	0.0356508
100289462	0.693072	1.24627	3.09644	0.402486	0.687327		DEFB4B	0.0450147
4254	1691.85	-1.24547	0.273053	-4.56129	5.08391e-06	0.000949457	KITLG	-0.928663
266629	0.30568	1.24418	3.13838	0.39644	0.691781		SEC14L3	0.0356508
347168	0.30568	1.24418	3.13838	0.39644	0.691781		OR1J1	0.0356508
574482	0.30568	1.24418	3.13838	0.39644	0.691781		MIR520D	0.0356508
728081	0.303948	1.24339	3.13826	0.396204	0.691955		LINC00290	0.0356508
80008	0.303948	1.24339	3.13826	0.396204	0.691955		TMEM156	0.0356508
63978	11591.7	1.24205	0.302073	4.11176	3.92653e-05	0.00436911	PRDM14	0.870758
646603	92.7117	1.24195	0.720678	1.72331	0.0848318	0.503253	C4orf51	0.472462
4332	0.26904	1.24187	3.13827	0.395717	0.692314		MNDA	0.0356508
6514	0.26904	1.24187	3.13827	0.395717	0.692314		SLC2A2	0.0356508
693135	0.267308	1.24108	3.13815	0.395481	0.692488		MIR551A	0.0356508
387778	10.551	-1.24054	0.884015	-1.4033	0.160526	0.640657	SPDYC	-0.268582
10060	6.61249	1.2402	0.929259	1.33461	0.182003		ABCC9	0.235084
100132987	0.497244	1.23927	3.11062	0.3984	0.690335		LINC00856	0.0353652
79955	35.4259	-1.23744	0.475842	-2.60053	0.00930791	0.169122	PDZD7	-0.586377
26254	65.5451	-1.23656	0.499158	-2.4773	0.0132381	0.204436	OPTC	-0.501846
100128264	0.290208	1.23617	3.1371	0.394048	0.693546		HTR5A-AS1	0.0356508
4653	0.70274	1.2353	3.09129	0.399605	0.689447		MYOC	0.00961004
442319	0.271888	1.23513	3.13721	0.393702	0.693801		RP11-3N2.13	0.0356508
79931	2.90446	-1.23483	1.71787	-0.718811	0.472257		TNIP3	-0.02379
10744	1.42541	1.23473	2.082	0.593052	0.553146		PTTG2	0.0644383
374977	9.03746	-1.23379	0.962831	-1.28142	0.200047	0.691538	MROH7	-0.264459
340990	68.5439	-1.23181	0.487315	-2.52774	0.0114799	0.188048	OTOG	-0.532195
170626	0.463624	1.23094	3.1109	0.395686	0.692337		XAGE3	0.0333335
54474	0.707296	-1.22962	3.08608	-0.39844	0.690306		KRT20	-0.0265977
8749	0.413818	-1.22882	3.12572	-0.393133	0.694221		ADAM18	-0.0252912
202309	0.871414	-1.22866	3.01553	-0.407444	0.683682		GAPT	-0.0394224
337875	0.668728	-1.2274	3.08943	-0.397292	0.691153		HIST2H2BA	-0.0312187
84953	5.86053	1.22712	1.30436	0.940788	0.346814		MICALCL	0.0781376
5948	4.17154	1.22694	1.09873	1.1167	0.264124		RBP2	0.180423
1364	455.547	-1.22663	0.247599	-4.95408	7.26738e-07	0.000203511	CLDN4	-0.936552
10082	3710.11	-1.22637	0.297511	-4.12211	3.75422e-05	0.00420523	GPC6	-0.85807
389730	9.47906	1.22566	0.778465	1.57445	0.115383	0.564339	SPATA31A6	0.311657
654342	64.7322	-1.22559	0.627322	-1.95369	0.0507375	0.40326	AC027612.6	-0.360378
1520	2.85805	-1.22542	1.31948	-0.92871	0.35304		CTSS	-0.10768
6507	2237.75	-1.22372	0.311487	-3.92865	8.54226e-05	0.00767524	SLC1A3	-0.8384
442902	2.0635	1.22326	1.8728	0.653171	0.513646		MIR330	-0.0181569
8048	0.491846	-1.22322	3.1168	-0.392459	0.694719		CSRP3	-0.0346424
4336	4.6348	1.22278	1.05832	1.1554	0.247927		MOBP	0.190605
9863	2755.89	1.22269	0.226097	5.40783	6.37944e-08	3.2481e-05	MAGI2	0.980164
6512	2.17774	1.2218	1.66287	0.734751	0.462491		SLC1A7	0.0432675
1748	27.8044	-1.22117	0.513094	-2.38002	0.0173115	0.236094	DLX4	-0.521667
84842	1178.2	-1.21983	0.376577	-3.23927	0.00119838	0.0474886	HPDL	-0.665854
10214	1.69049	-1.21936	2.01714	-0.604502	0.54551		SSX5	-0.0170133
9390	3.35006	-1.21927	1.25842	-0.968888	0.332601		SLC22A13	-0.108733
219995	13.6248	-1.2162	0.79607	-1.52776	0.126573	0.584416	MS4A15	-0.253981
100505768	0.660712	1.21556	3.09425	0.392846	0.694433		RP4-544H6.2	0.027444
154661	114.15	1.21555	0.401945	3.02417	0.00249318	0.073235	RUNDC3B	0.653158
134526	24.23	1.21541	0.602001	2.01895	0.0434929	0.378369	ACOT12	0.381458
128506	14.7291	1.2154	0.766196	1.58627	0.112678	0.562153	OCSTAMP	0.299113
152756	139.554	1.21482	0.478857	2.53691	0.0111836	0.18655	FAM218A	0.420447
963	47.6805	-1.21464	0.51459	-2.3604	0.0182552	0.241339	CD53	-0.478676
719	1.80116	-1.21403	1.94463	-0.624299	0.532431		C3AR1	-0.0704265
100126333	1.18156	1.21388	2.40417	0.504909	0.613623		MIR708	0.0212066
8490	4627.5	-1.21387	0.318086	-3.81617	0.000135537	0.0110335	RP11-267N12.3	-0.832978
100302736	4.37925	-1.21374	1.09638	-1.10704	0.268276		TICAM2	-0.192392
285195	83.6299	-1.21351	0.46548	-2.607	0.00913388	0.167541	SLC9A9	-0.53548
677836	2.4924	1.21312	1.61885	0.749369	0.453635		SNORA58	0.0402748
85481	16.8123	-1.21282	0.655658	-1.84977	0.064346	0.446937	PSKH2	-0.384346
100506895	102.469	1.21247	0.482348	2.51367	0.011948	0.192659	AC011738.4	0.568318
1958	422.769	-1.21228	0.314665	-3.85261	0.000116864	0.00996729	EGR1	-0.824454
940	4.66692	1.21201	1.5033	0.806232	0.420109		CD28	0.125255
100133545	49.8498	-1.2119	0.666301	-1.81886	0.0689335	0.461258	MRPL23-AS1	-0.39016
5733	219.836	1.21119	0.376451	3.21738	0.00129367	0.0492886	PTGER3	0.777237
79935	18.2185	1.21051	0.707227	1.71162	0.0869664	0.50807	CNTD2	0.280825
1041	1.83019	-1.20963	1.84725	-0.654829	0.512578		CDSN	-0.0636862
266722	472.502	1.20861	0.250965	4.81586	1.46567e-06	0.000351802	HS6ST3	0.942506
6352	0.953008	-1.20671	2.57857	-0.467977	0.639801		CCL5	-0.0321738
100128002	3.5334	1.20558	1.58974	0.75835	0.448241		RP11-495K9.6	0.0449252
284185	5.0769	-1.20501	1.09923	-1.09623	0.272979		LINC00482	-0.143394
1638	3.19059	-1.20459	1.44177	-0.835494	0.40344		DCT	-0.0619593
1135	1.61062	1.20385	2.33369	0.515858	0.605954		CHRNA2	-0.037759
1812	15.3491	1.20303	0.702654	1.71213	0.0868729	0.508054	DRD1	0.342505
9413	2418.51	1.20264	0.3209	3.74773	0.000178445	0.0132977	FAM189A2	0.805197
100506827	0.949772	1.20249	2.57883	0.466293	0.641006		RP11-328N19.1	0.0344115
285498	193.519	1.20193	0.353929	3.39595	0.000683911	0.0327381	RNF212	0.743501
253128	9.37665	1.20179	0.763445	1.57417	0.115449	0.564339	LINC00612	0.315649
7473	153.559	-1.20031	0.371417	-3.23169	0.00123058	0.048309	WNT3	-0.753719
343521	2.78196	-1.19893	1.38447	-0.865989	0.386496		TCTEX1D4	-0.103831
9628	72.2403	-1.19851	0.421499	-2.84344	0.00446288	0.106817	RGS6	-0.61146
11174	156.364	-1.19824	0.40442	-2.96286	0.00304795	0.082733	ADAMTS6	-0.582194
3213	1.52749	-1.19776	2.45531	-0.487822	0.625676		HOXB3	-0.0636826
941	4.97733	1.19757	1.02445	1.16899	0.242408		CD80	0.186909
79927	26.4502	-1.19704	0.545104	-2.19599	0.0280924	0.302376	FAM110D	-0.47696
5880	95.7773	-1.19571	0.376195	-3.17844	0.00148072	0.0526657	RAC2	-0.726543
170482	4.06993	1.19507	1.24793	0.957645	0.338242		CLEC4C	0.119934
1145	17.537	1.19489	0.697809	1.71234	0.0868334	0.508054	CHRNE	0.332643
154810	9214.61	1.19407	0.233899	5.10506	3.30686e-07	0.000121122	AMOTL1	0.934811
388550	1.82282	-1.19402	1.59588	-0.748192	0.454344		CEACAM22P	-0.0849365
4046	1.69234	-1.19401	2.16184	-0.55231	0.580736		LSP1	-0.0452912
5199	66.4622	-1.19321	0.387453	-3.07963	0.0020726	0.0652131	CFP	-0.682523
10046	25.5597	-1.19249	0.513311	-2.32314	0.0201718	0.253877	MAMLD1	-0.502888
401236	7.21255	1.19244	1.15845	1.02934	0.303321		STMND1	0.170233
100337591	0.503566	-1.19237	3.10498	-0.384018	0.700965		SNORA70F	-0.0130765
5350	2.14927	1.19212	1.68863	0.705969	0.480207		PLN	0.0678011
3128	7.2898	-1.19169	1.05125	-1.1336	0.256963		HLA-DRB6	-0.123492
7535	6.58488	-1.19124	0.947781	-1.25687	0.208801		ZAP70	-0.194916
6347	163.102	-1.19104	0.378646	-3.14551	0.00165796	0.0572012	CCL2	-0.710957
100302138	3.4264	-1.1907	1.42737	-0.834196	0.40417		MIR1292	-0.0570698
284656	196.274	1.19067	0.281778	4.22557	2.38341e-05	0.00299074	EPHA10	0.883791
4488	24.5931	-1.19003	0.623208	-1.90952	0.0561956	0.420248	MSX2	-0.419414
344901	1.44443	-1.19	1.84655	-0.644445	0.519287		OSTN	-0.0557774
677830	7.15143	1.18826	0.91568	1.29768	0.194399		SNORA50	0.230821
25790	15.1578	-1.18815	0.653013	-1.81948	0.0688377	0.461258	CCDC19	-0.40478
55026	44.6925	-1.18754	0.479861	-2.47477	0.0133324	0.205138	TMEM255A	-0.529411
284800	13.0114	-1.18747	0.84234	-1.40973	0.15862	0.637285	FAM182A	-0.284236
1260	0.516345	1.18682	3.11061	0.381538	0.702804		CNGA2	0.0357981
5317	102.729	1.18635	0.600709	1.97491	0.0482781	0.394153	PKP1	0.404548
401177	0.498025	1.1855	3.1104	0.381139	0.7031		CTD-2139B15.4	0.0347582
92086	2.28729	-1.18452	1.84793	-0.640998	0.521524		GGT1	-0.0317048
677818	0.836458	-1.18412	3.07708	-0.38482	0.700371		SNORA36B	-0.0337821
100506412	0.488277	-1.18378	3.11831	-0.379621	0.704227		LINC00871	-0.0345012
8764	2.93654	-1.18324	1.48767	-0.795367	0.4264		TNFRSF14	-0.0610534
1942	161.533	-1.18324	0.263043	-4.49825	6.85136e-06	0.00117466	EFNA1	-0.897372
254559	30.3177	-1.18279	0.474318	-2.49366	0.0126432	0.200976	LINC00925	-0.565803
56649	9.28766	-1.1819	0.788373	-1.49916	0.133831	0.595089	TMPRSS4	-0.337798
83844	1.42233	-1.18065	1.8549	-0.636503	0.524448		USP26	-0.08041
494337	0.505468	-1.18065	3.11931	-0.378497	0.705061		MIR425	-0.037216
3909	477.559	1.18049	0.451003	2.61749	0.00885796	0.164637	LAMA3	0.626394
170690	3035.91	1.17986	0.321822	3.66621	0.000246174	0.0164135	ADAMTS16	0.822962
26157	0.483676	1.17962	3.10944	0.379367	0.704415		GIMAP2	0.0345044
26095	0.502605	1.17934	3.10948	0.379274	0.704484		PTPN20B	0.0348189
653129	0.502605	1.17934	3.10948	0.379274	0.704484		PTPN20B	0.0348189
11151	843.913	1.17877	0.361863	3.2575	0.001124	0.0458875	CORO1A	0.646251
200008	4.23256	-1.17872	1.31428	-0.896858	0.369795		CDCP2	-0.193282
25826	2.05071	-1.17802	1.54856	-0.760717	0.446826		SNORD82	-0.085348
3101	0.699185	1.17751	2.85069	0.413063	0.679561		HK3	0.0303087
246754	1.14289	-1.17643	2.16926	-0.54232	0.587598		RP11-670E13.3	-0.0618418
132243	0.483029	-1.17636	3.11954	-0.377095	0.706103		H1FOO	-0.0371072
407031	0.398099	-1.17634	3.12784	-0.376088	0.706851		MIR30C1	-0.0252912
401498	232.666	1.17568	0.38043	3.09041	0.00199883	0.0635366	TMEM215	0.737445
100169851	1.51506	1.17516	2.94802	0.398627	0.690168		PATE3	0.0524211
2831	17.1523	1.17503	0.669963	1.75387	0.0794522	0.489053	NPBWR1	0.345829
123103	5.66972	1.17483	1.26381	0.929597	0.35258		KLHL33	0.0197612
29986	3.55315	-1.17396	1.11925	-1.04888	0.294233		SLC39A2	-0.17343
132141	1.42258	-1.17393	2.56608	-0.45748	0.647326		IQCF1	-0.0423972
4115	0.59078	-1.17392	3.09638	-0.379127	0.704593		MAGEB4	-0.00221678
51384	55.5728	1.17368	0.498337	2.35519	0.0185133	0.242448	WNT16	0.592705
22861	30.9242	-1.1733	0.573902	-2.04443	0.040911	0.367403	NLRP1	-0.493892
127540	0.686364	1.17325	2.86493	0.40952	0.682158		HMGB4	0.0312818
1747	9.31047	-1.17041	0.746156	-1.56858	0.116745	0.566597	DLX3	-0.314962
23148	1347.51	1.17038	0.359323	3.25719	0.0011252	0.0458875	NACAD	0.696859
8785	225.029	1.16838	0.28828	4.05295	5.05766e-05	0.00534458	MATN4	0.844033
5745	115.203	1.16761	0.561399	2.07982	0.0375424	0.352593	PTH1R	0.444883
100132249	2.41947	-1.16698	1.90878	-0.611377	0.54095		FAM201B	0.0132357
200772	1.72557	1.1666	1.78952	0.65191	0.514459		AC104809.4	0.0999593
91937	1.93011	-1.16576	1.73329	-0.67257	0.501221		TIMD4	-0.0417867
10107	8.17352	-1.16565	0.978799	-1.1909	0.233694		TRIM10	-0.147732
100131726	2.29689	1.16539	1.49933	0.777271	0.436999		FAM83A-AS1	0.102308
25858	24.7185	-1.16522	0.598767	-1.94604	0.0516503	0.404979	TEX40	-0.381044
253264	1.82641	1.1642	1.9349	0.601686	0.547383		ZNF503-AS1	0.0317087
8000	2.00481	-1.1642	1.77281	-0.656698	0.511375		PSCA	-0.0633145
100129781	27.2129	1.16389	0.516836	2.25195	0.0243254	0.280458	RP11-65J21.3	0.514354
6005	0.613034	-1.16354	3.09975	-0.375367	0.707387		RHAG	-0.0231262
8601	44.0749	1.16297	0.514742	2.25933	0.023863	0.278242	RGS20	0.489229
91392	533.592	-1.16139	1.09235	-1.0632	0.28769	0.775365	ZNF502	0.0149945
1996	31.7013	-1.1596	0.578838	-2.00332	0.0451425	0.384021	ELAVL4	-0.521134
162998	1.64023	-1.15949	2.48241	-0.467081	0.640442		OR7D2	-0.0288138
56833	2.022	1.1594	1.7886	0.648213	0.516847		SLAMF8	0.0561213
590	226.829	-1.15903	0.546292	-2.12164	0.0338683	0.332471	BCHE	-0.396223
100507203	1.86454	-1.15848	1.56203	-0.741652	0.458298		SMLR1	-0.0919496
5346	14.9939	-1.15837	0.760173	-1.52383	0.127551	0.585598	PLIN1	-0.300964
401613	252.444	1.15821	0.408141	2.83777	0.00454294	0.108117	LINC00890	0.718578
83957	1.17481	1.15794	2.80102	0.413401	0.679313		FRMD8P1	0.0209908
4693	28.2943	1.15759	0.499431	2.31781	0.0204596	0.255304	NDP	0.510316
100129827	1.45423	1.15725	2.04169	0.56681	0.570843		MRVI1-AS1	0.0474079
100126347	0.875897	1.15655	2.61927	0.441554	0.658812		MIR887	0.0312799
100506134	2.29049	1.1562	1.69086	0.683797	0.494103		TTC21B-AS1	0.0343287
3512	1.34596	-1.15494	1.87605	-0.615622	0.538144		IGJ	-0.0444972
9290	1.24253	1.15466	2.84907	0.405276	0.685275		GPR55	-0.0167876
158297	2.99521	-1.15463	1.41961	-0.813343	0.416021		FAM154A	-0.0758173
284904	216.537	1.15425	0.235536	4.90053	9.55802e-07	0.000259022	SEC14L4	0.906569
6555	0.917254	1.15363	2.58262	0.446688	0.655101		SLC10A2	0.0287629
23546	5.5798	-1.15334	1.12842	-1.02209	0.30674		SYNGR4	-0.118024
100049587	1.8573	-1.15189	2.412	-0.477568	0.632958		SIGLEC14	-0.0608497
100506840	1.54514	1.15115	2.90769	0.3959	0.692179		RP11-314A5.3	0.0286598
57094	21.1969	1.15107	0.768467	1.49788	0.134164	0.595114	CPA6	0.34612
148898	25.2387	-1.15025	0.598328	-1.92245	0.0545495	0.415176	C1orf213	-0.4357
118856	2.59404	1.14907	1.82946	0.628089	0.529946		MMP21	0.0223183
65012	34.9372	-1.14899	0.461512	-2.48963	0.0127876	0.201743	SLC26A10	-0.606064
23213	2629.99	-1.14852	0.276399	-4.15528	3.24886e-05	0.00376465	SULF1	-0.889298
94030	920.45	-1.14829	0.216307	-5.30862	1.10461e-07	4.88413e-05	LRRC4B	-0.941286
654346	1.48546	-1.14765	1.85402	-0.619007	0.535912		LGALS9C	-0.0831865
126068	89.0623	1.14741	0.429236	2.67315	0.00751422	0.14906	ZNF441	0.585071
2346	21.0977	-1.14714	0.981849	-1.16835	0.242667	0.731586	FOLH1	-0.23157
390999	0.892064	1.14535	3.03815	0.37699	0.706181		PRAMEF12	0.0372855
406920	5.558	-1.14462	0.980608	-1.16726	0.243107		MIR130B	-0.196667
339976	0.969538	-1.14412	3.00869	-0.380272	0.703743		TRIML1	-0.0382253
10398	10831.6	1.14328	0.200184	5.71117	1.12201e-08	7.25077e-06	MYL9	0.952985
338751	0.590237	-1.14328	3.09836	-0.368996	0.71213		OR52L1	-0.0264905
100134259	5.21054	-1.14256	1.10472	-1.03425	0.301018		LINC01119	-0.108111
54959	1.13636	-1.14175	2.76712	-0.412613	0.67989		ODAM	-0.0526774
129684	39.7232	1.14056	0.457727	2.4918	0.0127097	0.201471	CNTNAP5	0.589189
660	1.61133	-1.13911	1.66711	-0.683286	0.494426		BMX	-0.0865834
28984	14.4239	1.13897	0.664004	1.7153	0.0862905	0.507849	RGCC	0.364922
100507040	1.91622	1.13862	1.54894	0.735094	0.462282		LINC00427	0.0872663
401563	3.20222	1.13842	1.1975	0.950669	0.341772		C9orf139	0.121471
57605	662.713	1.13806	0.357906	3.17977	0.00147391	0.0526657	PITPNM2	0.746535
345456	0.396932	1.13797	3.12493	0.364159	0.715739		PFN3	0.0234624
147872	3.66111	-1.13736	1.2846	-0.885387	0.375948		CCDC155	-0.10084
8626	4.24577	-1.1373	1.15432	-0.985249	0.324502		TP63	-0.113543
50832	23.3557	1.13689	0.721951	1.57474	0.115316	0.564339	TAS2R4	0.273018
390243	1.42392	-1.13681	2.06794	-0.549732	0.582503		FOLR4	-0.0666511
3699	4.01729	-1.13558	1.24483	-0.912238	0.361643		ITIH3	-0.102746
390667	2.53214	-1.13518	1.27232	-0.892212	0.372279		PTX4	-0.134106
100507537	117.999	-1.13494	0.634544	-1.78858	0.0736818	0.47287	RP11-451G4.2	-0.061635
10202	510.632	1.1347	0.433907	2.61508	0.00892069	0.165009	DHRS2	0.724488
1463	1467.78	1.13467	0.263554	4.30527	1.66779e-05	0.0022969	NCAN	0.869791
7694	519.734	1.13449	0.288625	3.93067	8.47096e-05	0.00767524	ZNF135	0.793901
729786	1.4362	-1.13424	2.32041	-0.488812	0.624975		GOLGA8CP	-0.00336365
155038	2.12733	-1.13407	1.66699	-0.680311	0.496308		GIMAP8	-0.0348776
57369	49.9927	1.13289	0.712261	1.59055	0.111711	0.5617	GJD2	0.318616
54453	44.2779	-1.13231	0.554559	-2.04183	0.0411689	0.367747	RIN2	-0.386974
127003	9.08175	1.13197	0.778577	1.4539	0.145974	0.614804	C1orf194	0.301117
11259	17.3129	1.13143	0.678452	1.66766	0.0953832	0.528049	FILIP1L	0.387465
641700	71.3251	-1.13131	0.599467	-1.88719	0.0591342	0.430965	ECSCR	-0.367051
10739	12.2127	1.13059	0.771336	1.46575	0.142716	0.610873	RFPL2	0.338485
23072	972.621	1.13011	0.257885	4.38224	1.17465e-05	0.0017868	HECW1	0.858314
1908	27.2085	-1.12782	0.679691	-1.65932	0.0970518	0.531635	EDN3	-0.203132
1043	12.4926	-1.12778	0.789192	-1.42902	0.152997	0.6296	CD52	-0.255198
3670	10.781	-1.12738	0.842482	-1.33817	0.180841	0.671193	ISL1	-0.257654
653082	4.24427	-1.12704	1.05976	-1.06348	0.287564		ZDHHC11B	-0.176394
100422925	1.20737	1.12694	2.4061	0.468367	0.639522		MIR4322	0.0359711
816	8.57077	1.12687	0.911289	1.23656	0.216249		CAMK2B	0.196801
9389	2.04497	-1.12669	1.84477	-0.61075	0.541365		SLC22A14	-0.0539971
4914	9.11437	-1.12657	0.884819	-1.27322	0.202939	0.694427	NTRK1	-0.190198
647946	137.903	1.12649	0.96999	1.16135	0.245501	0.734624	LINC00669	0.177378
10446	251.351	-1.12634	0.427156	-2.63683	0.00836858	0.15906	LRRN2	-0.488948
7025	1.08644	1.12616	2.89985	0.38835	0.697757		NR2F1	0.0331304
3269	31.1958	1.12481	0.674071	1.66868	0.0951799	0.527445	HRH1	0.399944
100133077	3.85305	1.12379	1.13863	0.986963	0.323661		RP11-188C12.3	0.152646
283685	3.10115	1.12366	2.01865	0.556641	0.577773		GOLGA6L2	0.0448969
4208	55.8567	-1.1231	0.452396	-2.48257	0.013044	0.204064	MEF2C	-0.582089
154288	8.37713	1.12251	1.30863	0.857775	0.391017		KHDC3L	0.193939
400236	78.2406	1.12205	0.306737	3.65804	0.000254155	0.0167463	FOXN3-AS1	0.774374
159963	359.313	-1.12131	0.357557	-3.13603	0.00171253	0.0584836	SLC5A12	-0.65344
9499	5.92807	1.12103	1.29413	0.866243	0.386357		MYOT	0.0822389
341019	10.1693	1.12005	0.866474	1.29265	0.196131	0.687044	DCDC1	0.211281
3604	1.2308	1.1199	2.3994	0.466741	0.640686		TNFRSF9	0.0244221
221223	0.549142	-1.11948	3.097	-0.361471	0.717747		CES5A	-0.00612517
399670	0.549142	-1.11948	3.097	-0.361471	0.717747		RPL13AP17	-0.00612517
79026	1552.16	-1.11836	0.335908	-3.32938	0.000870405	0.0392079	AHNAK	-0.743755
145773	62.5259	-1.11808	0.333929	-3.34826	0.000813218	0.0372308	FAM81A	-0.729943
406896	0.676247	-1.11782	3.09214	-0.361504	0.717723		MIR103A2	-0.0282612
27328	4366.52	1.11722	0.357428	3.12573	0.00177364	0.0598407	PCDH11Y	0.608457
401253	1.53168	-1.11603	2.27866	-0.489775	0.624293		LINC00336	-0.0575864
3578	0.532628	1.11591	3.10514	0.359374	0.719315		IL9	0.0114403
5816	38.7134	-1.11579	0.414607	-2.6912	0.00711955	0.144124	PVALB	-0.61601
100302691	1.37591	1.1139	1.9307	0.576941	0.563979		LINC00184	0.0387922
23409	66.7355	-1.11346	0.31494	-3.53545	0.000407082	0.0235855	SIRT4	-0.757947
403273	1.03095	-1.11267	2.51754	-0.441969	0.658512		OR5H14	-0.0208647
4110	1.32743	-1.11249	2.10348	-0.52888	0.596888		MAGEA11	-0.0579806
8578	155.973	-1.1123	0.326516	-3.40658	0.000657815	0.032178	SCARF1	-0.739408
10893	4024.37	1.11107	0.325347	3.41502	0.000637782	0.0318929	MMP24	0.693031
29909	0.787164	-1.11102	3.09082	-0.359459	0.719252		GPR171	-0.0330233
286	564.116	-1.1103	0.24597	-4.51394	6.3634e-06	0.00111373	ANK1	-0.875467
925	88.9569	1.11029	0.481275	2.30699	0.0210556	0.257667	CD8A	0.548375
53840	2.08195	-1.10976	1.74175	-0.63715	0.524027		TRIM6-TRIM34	-0.0867425
5542	0.505315	1.10924	3.11903	0.355636	0.722113		PRB1	0.0348345
5553	12.98	-1.10767	0.759608	-1.45821	0.144782	0.614275	PRG2	-0.280361
220081	0.386735	1.10687	3.12731	0.353936	0.723387		FAM194B	0.0234624
4883	10.0787	1.10644	0.905256	1.22224	0.221615	0.713465	NPR3	0.32397
5409	152.608	1.10384	0.298244	3.70112	0.000214649	0.015301	PNMT	0.764757
254240	0.403494	1.10365	3.12769	0.352863	0.724191		BPIFC	0.0234624
22806	24.5714	1.10299	0.563585	1.9571	0.0503356	0.401585	IKZF3	0.402453
55336	2.42751	-1.10236	1.42926	-0.771283	0.440539		FBXL8	-0.0825588
54866	1.41378	-1.10216	1.6999	-0.648368	0.516747		PPP1R14D	-0.0635963
170712	0.21072	-1.10194	3.14938	-0.349891	0.726421		COX7B2	-0.0252912
2993	0.21072	-1.10194	3.14938	-0.349891	0.726421		GYPA	-0.0252912
406908	0.21072	-1.10194	3.14938	-0.349891	0.726421		MIR124-2	-0.0252912
574448	0.21072	-1.10194	3.14938	-0.349891	0.726421		MIR202HG	-0.0252912
58531	0.21072	-1.10194	3.14938	-0.349891	0.726421		PRM3	-0.0252912
79722	0.21072	-1.10194	3.14938	-0.349891	0.726421		ANKRD55	-0.0252912
85285	0.21072	-1.10194	3.14938	-0.349891	0.726421		KRTAP4-1	-0.0252912
9333	0.21072	-1.10194	3.14938	-0.349891	0.726421		TGM5	-0.0252912
10761	29.6942	-1.10179	0.64723	-1.70232	0.088695	0.51335	PLAC1	-0.262687
1133	2.62823	1.10085	1.41685	0.776967	0.437178		CHRM5	0.0784204
54674	45.2536	-1.10022	0.490781	-2.24178	0.0249755	0.284294	LRRN3	-0.419683
1646	28.0568	-1.10014	0.48152	-2.28473	0.0223285	0.267401	AKR1C2	-0.537703
407016	4.02956	-1.09903	1.25448	-0.87609	0.380981		MIR26A2	-0.0879791
132332	41.6914	1.09899	0.444609	2.4718	0.0134433	0.206052	TMEM155	0.543654
51702	73.3447	-1.0981	0.581846	-1.88727	0.0591242	0.430965	PADI3	-0.306136
158511	0.390464	1.09747	3.12658	0.351013	0.725578		CSAG1	0.0234624
2557	107.867	1.09737	0.408005	2.6896	0.00715379	0.144469	GABRA4	0.659873
645840	1.51238	-1.09714	1.67129	-0.656461	0.511528		TXNRD3	-0.072831
9515	675.065	1.09714	0.299019	3.66912	0.000243388	0.0163576	STXBP5L	0.758695
56101	510.782	1.09697	0.446233	2.45828	0.0139604	0.209806	PCDHGB4	0.59955
374955	3.63211	-1.09561	1.23365	-0.888104	0.374485		SPATA21	-0.118705
255349	1.81848	-1.09508	1.71348	-0.639094	0.522762		TMEM211	-0.0336116
339505	0.192717	-1.09505	3.14842	-0.34781	0.727983		LINC01141	-0.0252912
55363	0.192717	-1.09505	3.14842	-0.34781	0.727983		HEMGN	-0.0252912
730811	0.192717	-1.09505	3.14842	-0.34781	0.727983		MYT1L-AS1	-0.0252912
10561	0.199672	-1.0947	3.14837	-0.347704	0.728063		IFI44	-0.0252912
342898	0.199672	-1.0947	3.14837	-0.347704	0.728063		SYCN	-0.0252912
6364	0.199672	-1.0947	3.14837	-0.347704	0.728063		CCL20	-0.0252912
8368	1.59915	-1.09456	2.05442	-0.532786	0.594182		HIST2H4A	-0.0185602
100506527	0.192889	-1.09423	3.1483	-0.347561	0.72817		LINC01007	-0.0252912
401137	0.192889	-1.09423	3.1483	-0.347561	0.72817		C4orf40	-0.0252912
441521	0.192889	-1.09423	3.1483	-0.347561	0.72817		CT45A2	-0.0252912
4888	0.192889	-1.09423	3.1483	-0.347561	0.72817		NPY6R	-0.0252912
148229	279.351	-1.09413	0.244554	-4.474	7.67707e-06	0.00127713	ATP8B3	-0.837386
346653	4.16845	1.09409	1.47566	0.741425	0.458436		FAM71F2	0.121648
100506421	0.210301	-1.09338	3.1482	-0.347304	0.728363		LINC01158	-0.0252912
139105	0.210301	-1.09338	3.1482	-0.347304	0.728363		BEND2	-0.0252912
241	0.210301	-1.09338	3.1482	-0.347304	0.728363		ALOX5AP	-0.0252912
246777	0.210301	-1.09338	3.1482	-0.347304	0.728363		SPESP1	-0.0252912
406936	0.210301	-1.09338	3.1482	-0.347304	0.728363		MIR451B	-0.0252912
150350	0.217255	-1.09303	3.14815	-0.347198	0.728442		ENTHD1	-0.0252912
400238	0.217255	-1.09303	3.14815	-0.347198	0.728442		LINC00642	-0.0252912
5368	0.217255	-1.09303	3.14815	-0.347198	0.728442		PNOC	-0.0252912
5956	0.217255	-1.09303	3.14815	-0.347198	0.728442		OPN1LW	-0.0252912
80834	0.217255	-1.09303	3.14815	-0.347198	0.728442		TAS1R2	-0.0252912
112714	2.57497	1.09286	1.58253	0.690581	0.489829		TUBA3E	0.0116619
161635	0.603729	1.09264	3.02287	0.361457	0.717758		CSNK1A1P1	0.0204548
130367	27.0879	1.0926	0.522917	2.08944	0.036668	0.348626	SGPP2	0.505016
100422966	0.210473	-1.09256	3.14808	-0.347055	0.72855		MIR4277	-0.0252912
100507381	0.210473	-1.09256	3.14808	-0.347055	0.72855		KCNQ5-IT1	-0.0252912
138240	0.210473	-1.09256	3.14808	-0.347055	0.72855		C9orf57	-0.0252912
339967	0.210473	-1.09256	3.14808	-0.347055	0.72855		TMPRSS11A	-0.0252912
387522	0.210473	-1.09256	3.14808	-0.347055	0.72855		TMEM189-UBE2V1	-0.0252912
390245	0.210473	-1.09256	3.14808	-0.347055	0.72855		KDM4E	-0.0252912
644994	0.210473	-1.09256	3.14808	-0.347055	0.72855		SMIM23	-0.0252912
284080	6.9565	-1.09241	1.00534	-1.0866	0.277212		RP11-1094H24.4	-0.212563
100506373	8.38729	-1.09226	1.12743	-0.968806	0.332642		CTD-2377D24.6	-0.220992
64800	125.638	1.09208	0.378895	2.88227	0.00394827	0.0978406	EFCAB6	0.64802
440131	0.471052	1.09199	3.11874	0.35014	0.726234		LINC00544	0.0332233
341276	1.44926	1.09184	2.00444	0.54471	0.585953		OR10A2	0.0430036
399	430.235	1.09085	0.328514	3.32056	0.000898367	0.0397356	RHOH	0.713407
4824	87.5981	-1.09069	0.314003	-3.47352	0.000513681	0.0274868	NKX3-1	-0.749801
2572	50.7968	1.09037	0.529946	2.0575	0.0396378	0.363196	GAD2	0.480057
100506311	2.62489	-1.09036	1.42483	-0.765257	0.444118		HOTAIRM1	-0.111436
6252	424.78	1.08972	0.224352	4.85717	1.19073e-06	0.000294215	RTN1	0.889652
93659	2.14249	-1.08943	1.66454	-0.654491	0.512796		CGB	-0.0472959
10194	23.5214	-1.08858	0.603739	-1.80307	0.071377	0.466658	TSHZ1	-0.460203
131909	4.87897	-1.08702	1.26464	-0.85955	0.390037		FAM172BP	-0.183387
406992	1.4861	1.08615	2.01061	0.540212	0.589051		MIR210	0.0660768
26716	0.199253	-1.08609	3.14719	-0.345098	0.730021		OR2H1	-0.0252912
401335	0.199253	-1.08609	3.14719	-0.345098	0.730021		C7orf65	-0.0252912
100422871	0.19247	-1.08561	3.14712	-0.344954	0.730129		MIR3117	-0.0252912
341568	0.19247	-1.08561	3.14712	-0.344954	0.730129		OR8S1	-0.0252912
386676	0.19247	-1.08561	3.14712	-0.344954	0.730129		KRTAP10-9	-0.0252912
693205	0.19247	-1.08561	3.14712	-0.344954	0.730129		MIR620	-0.0252912
80326	0.19247	-1.08561	3.14712	-0.344954	0.730129		WNT10A	-0.0252912
140628	29.5195	1.08551	0.556561	1.95039	0.0511293	0.404651	GATA5	0.419804
100505550	0.199425	-1.08526	3.14707	-0.344847	0.73021		RP1-153P14.3	-0.0252912
127391	0.199425	-1.08526	3.14707	-0.344847	0.73021		TMCO2	-0.0252912
1671	0.199425	-1.08526	3.14707	-0.344847	0.73021		DEFA6	-0.0252912
285242	0.199425	-1.08526	3.14707	-0.344847	0.73021		HTR3E	-0.0252912
3078	0.199425	-1.08526	3.14707	-0.344847	0.73021		CFHR1	-0.0252912
338785	0.199425	-1.08526	3.14707	-0.344847	0.73021		KRT79	-0.0252912
51298	0.199425	-1.08526	3.14707	-0.344847	0.73021		THEG	-0.0252912
923	8.46572	1.08507	0.828105	1.31031	0.190091		CD6	0.233057
219595	6.62217	-1.08507	1.24401	-0.872232	0.383082		FOLH1	0.038494
168391	2.21171	-1.085	1.46912	-0.738538	0.460188		GALNTL5	-0.0834453
642968	26.6002	-1.08478	0.685637	-1.58215	0.113615	0.563564	FAM163B	-0.291761
1880	1.19915	1.08348	2.82411	0.383655	0.701234		GPR183	0.0131379
100422833	0.409883	-1.08336	3.12068	-0.347154	0.728475		MIR3188	-0.0252912
84684	0.962802	1.08277	2.29704	0.471376	0.637372		INSM2	0.0448434
83740	3.0219	-1.08245	1.40696	-0.769356	0.441682		H2AFB2	-0.0802039
114798	292.951	1.08139	0.487231	2.21945	0.0264558	0.293569	SLITRK1	0.475493
8447	70.355	1.08091	0.447978	2.41286	0.0158278	0.225181	DOC2B	0.59614
6699	1.91786	-1.0807	2.35347	-0.459197	0.646093		SPRR1B	-0.0805879
100507466	4.54876	-1.07982	1.18951	-0.907785	0.363992		DPH6-AS1	-0.0841529
440163	0.788912	-1.07883	3.07931	-0.350348	0.726077		RNASE13	-0.0228818
6585	291.776	1.07812	0.246189	4.37922	1.19106e-05	0.0017868	SLIT1	0.860541
4057	125.893	1.07788	1.1607	0.928648	0.353072	0.818297	LTF	0.248472
54436	6.51623	-1.07749	0.953651	-1.12986	0.258535		SH3TC1	-0.216462
54361	56.8659	-1.07707	0.499242	-2.15741	0.0309735	0.318005	WNT4	-0.455594
8174	125.976	1.07668	0.393988	2.73278	0.00628027	0.132232	MADCAM1	0.655383
348840	4.79568	1.07638	1.14552	0.939637	0.347404		ANKRD18DP	0.175333
100129407	5.25581	-1.07529	1.14557	-0.938658	0.347906		RP1-172N19.1	-0.0823718
285740	0.611061	-1.07529	3.10504	-0.346305	0.729113		RP11-436I24.1	-0.0208621
9096	1.81414	-1.07511	1.91174	-0.562375	0.573861		TBX18	-0.0291922
91703	3.84497	-1.07511	1.26024	-0.853099	0.393605		ACY3	-0.123091
100130348	1.88315	1.07504	1.73182	0.620761	0.534757		TMEM262	0.0732881
100287814	0.409465	-1.07472	3.11952	-0.344513	0.73046		LINC00582	-0.0252912
406985	0.416419	-1.07436	3.11947	-0.344405	0.730542		MIR200C	-0.0252912
100128374	0.601303	1.07406	3.09683	0.346825	0.728723		AC110781.3	0.0218763
9227	4092.93	1.07287	0.611708	1.7539	0.0794483	0.489053	LRAT	0.386459
79861	3.15746	-1.072	1.34364	-0.797839	0.424964		TUBAL3	-0.124064
11122	379.791	1.07164	0.283016	3.78651	0.000152778	0.011828	PTPRT	0.755396
166979	5.16458	-1.07005	1.10211	-0.970916	0.33159		CDC20B	-0.14615
153	20.5952	1.06919	0.570403	1.87445	0.0608688	0.437032	ADRB1	0.37798
100130933	3.62956	1.06891	1.13014	0.945826	0.344238		SMIM6	0.146414
9961	326.628	-1.06826	0.443353	-2.40951	0.0159739	0.22592	MVP	-0.538558
3866	5.80333	-1.06721	1.17214	-0.910477	0.362571		KRT15	-0.175463
124773	5.14379	1.06687	1.01177	1.05446	0.291673		C17orf64	0.21512
7432	0.594853	1.06572	3.09679	0.344138	0.730743		VIP	0.0216638
6509	896.173	1.06555	0.328865	3.24009	0.00119491	0.0474632	SLC1A4	0.610404
155054	1154.02	1.06462	0.199398	5.33918	9.33683e-08	4.35771e-05	ZNF425	0.891643
170392	1.20078	1.06427	1.98674	0.535684	0.592177		OIT3	0.0277142
55	91.1265	-1.06358	0.41648	-2.55374	0.0106573	0.181976	ACPP	-0.60759
286234	15.1345	1.06341	0.702671	1.51338	0.130182	0.588747	SPATA31E1	0.360098
6559	3.36696	-1.06256	1.27264	-0.834931	0.403756		SLC12A3	-0.123149
55450	323.448	-1.06225	0.33341	-3.18602	0.00144242	0.052458	CAMK2N1	-0.678872
2903	819.726	1.06224	0.362011	2.93429	0.00334316	0.087359	GRIN2A	0.639138
100287898	2.33318	1.0622	2.47064	0.429932	0.667245		TTC34	-0.00385899
4608	0.715561	-1.06215	3.09168	-0.343552	0.731183		MYBPH	-0.0123377
100129138	0.593394	1.06183	3.0984	0.342702	0.731822		RP11-364B6.1	0.022375
100423028	0.991218	1.0616	2.30434	0.460697	0.645016		MIR4254	0.0455636
124961	170.883	1.06071	0.285997	3.70882	0.000208231	0.0150159	ZFP3	0.772607
283651	2.99648	-1.06055	1.48782	-0.712823	0.475955		HMGN2P46	-0.0864164
440243	0.843397	-1.06044	3.08166	-0.344112	0.730762		GOLGA6L1	-0.0358268
57467	6.57181	-1.0601	1.03751	-1.02178	0.306886		HHATL	-0.15754
10743	166.053	-1.06008	0.457035	-2.31948	0.0203692	0.255214	RAI1	-0.504748
284355	2.54938	1.05997	1.83747	0.576865	0.564031		TPRX1	0.0218687
6540	4.57601	-1.05994	1.07652	-0.984595	0.324823		SLC6A13	-0.175921
7058	4866.49	1.05951	0.243098	4.35837	1.31034e-05	0.00189796	THBS2	0.82156
401463	0.784163	1.05949	3.07892	0.344111	0.730763		RP11-21C4.1	0.032712
57402	52.6384	-1.05948	0.386744	-2.73948	0.00615366	0.130548	S100A14	-0.621646
4616	317.654	-1.05788	0.446372	-2.36994	0.0177908	0.238877	GADD45B	-0.445238
55106	967.012	-1.05771	0.395021	-2.6776	0.00741522	0.148146	SLFN12	-0.526588
84944	33.7644	1.05755	0.636335	1.66193	0.0965261	0.530807	MAEL	0.382759
283194	25.7603	-1.05647	0.633994	-1.66637	0.0956394	0.528596	RP11-142C4.6	-0.326229
693196	2.01828	-1.05635	1.51864	-0.695589	0.486686		MIR611	-0.0585235
25834	292.741	-1.05579	0.332583	-3.1745	0.00150094	0.0529807	MGAT4C	-0.619275
133690	2.15856	-1.05552	1.46811	-0.718969	0.47216		CAPSL	-0.0724604
100126270	9.93716	1.05538	0.931684	1.13276	0.257314	0.746055	FMR1-AS1	0.155616
5340	3.20477	1.0552	1.22397	0.862119	0.388622		PLG	0.139387
100507540	0.900904	-1.05416	2.62871	-0.401019	0.688406		RP11-63P12.6	-0.0128749
1758	13.308	-1.05338	0.685764	-1.53607	0.124521	0.581168	DMP1	-0.339357
645166	33.5897	-1.05325	0.530646	-1.98484	0.0471626	0.389782	RP11-14N7.2	-0.445754
64231	0.695196	1.05211	3.0937	0.340081	0.733795		MS4A6A	-0.0090568
1009	1101.57	1.05159	0.349818	3.00611	0.00264615	0.0750396	CDH11	0.703536
26471	38.2735	1.05156	0.585276	1.79668	0.0723862	0.469937	NUPR1	0.363285
57639	63.8032	-1.05149	0.543088	-1.93614	0.0528509	0.410204	CCDC146	-0.413539
84691	249.15	1.05145	0.239517	4.38988	1.13415e-05	0.00174826	FAM71F1	0.827774
114	1143.53	1.0511	0.74574	1.40948	0.158694	0.637433	ADCY8	0.324605
130075	2.17192	1.0498	1.79992	0.583252	0.559724		OR9A4	0.121213
10218	1.89624	1.04975	1.71124	0.613443	0.539583		ANGPTL7	0.0357996
4889	287.792	1.04944	0.315763	3.32349	0.000888978	0.0396196	NPY5R	0.731815
8639	311.769	-1.04886	0.335917	-3.12238	0.00179397	0.060106	AOC3	-0.702946
27303	89.605	-1.04878	0.444791	-2.35791	0.0183782	0.241598	RBMS3	-0.48854
63923	150.626	1.04838	0.354716	2.95555	0.00312116	0.0834416	TNN	0.691248
574537	0.76975	-1.04818	3.10744	-0.337312	0.735882		UGT2A2	-0.0474139
124783	11.7021	1.04817	0.825615	1.26957	0.204238	0.695003	SPATA32	0.21502
6192	3919.14	-1.04784	1.98547	-0.527757	0.597668	0.917502	RPS4Y1	-0.0315901
400591	3.89998	1.04777	1.43901	0.728116	0.466542		C17orf102	0.0465642
2642	32.1169	1.04718	0.625891	1.67311	0.0943054	0.525023	GCGR	0.502413
84435	49.2669	1.04706	0.511867	2.04558	0.0407975	0.367156	GPR123	0.509467
100507027	4.46371	1.04534	1.15183	0.907548	0.364117		LINC00948	0.130454
146850	5.97917	-1.04521	1.07642	-0.971004	0.331546		PIK3R6	-0.133484
257313	1.45336	1.0445	2.03937	0.512169	0.608533		UTS2B	0.039332
54809	5.60615	1.04336	1.11139	0.938786	0.34784		SAMD9	0.111651
168667	55.4278	-1.04318	0.466877	-2.23437	0.0254588	0.287279	BMPER	-0.536318
441897	0.997869	-1.04316	2.08603	-0.500069	0.617026		PGCP1	-0.0320952
115749	156.732	1.04306	0.338903	3.07775	0.0020857	0.0655027	C12orf56	0.670236
6402	9.28914	-1.04258	0.807001	-1.29192	0.196386	0.687044	SELL	-0.304017
767	311.186	-1.04179	0.29822	-3.49336	0.000476981	0.0263626	CA8	-0.706831
81629	85.1755	-1.04177	0.473692	-2.19926	0.0278592	0.30083	TSSK3	-0.458901
2906	1941.18	-1.04174	0.334791	-3.11162	0.00186064	0.0608218	GRIN2D	-0.681096
100124539	0.788814	1.04128	3.06833	0.339365	0.734335		SNORA11B	0.017103
254778	17.9843	-1.04081	0.646512	-1.60988	0.107425	0.555027	C8orf46	-0.38462
2681	1.97255	-1.04021	1.83882	-0.565695	0.571601		GGTA1P	-0.0547642
5118	1450.32	-1.03968	0.304809	-3.41093	0.000647414	0.0320635	PCOLCE	-0.680667
54897	432.262	-1.03964	0.293158	-3.54634	0.000390618	0.0230959	CASZ1	-0.710928
118429	881.637	-1.0396	0.27436	-3.7892	0.000151136	0.011828	ANTXR2	-0.767824
6690	53.2477	-1.03937	0.527047	-1.97206	0.0486031	0.395508	SPINK1	-0.424315
53632	0.688831	1.0391	2.90723	0.357421	0.720777		PRKAG3	0.0107443
1370	2.61756	1.0391	1.47639	0.703812	0.48155		CPN2	0.0530068
7134	134.887	-1.03892	0.33461	-3.10486	0.00190369	0.0613985	TNNC1	-0.657882
414194	1.67556	1.03862	3.08025	0.337187	0.735976		CCNYL2	0.0356903
55220	269.61	1.03725	0.835623	1.24129	0.2145	0.707049	KLHDC8A	0.262962
54894	147.223	-1.03685	0.333946	-3.10483	0.00190386	0.0613985	RNF43	-0.683931
22802	0.635092	-1.0366	3.0953	-0.334894	0.737705		CLCA4	-0.0430278
5104	189.42	-1.03597	0.293149	-3.53394	0.00040942	0.0236394	SERPINA5	-0.72446
53828	1.00842	-1.03578	2.51229	-0.412284	0.680131		FXYD4	-0.0213344
6534	2.45576	1.03459	1.67745	0.616764	0.53739		SLC6A7	0.0777633
100506394	46.3094	1.03433	0.401311	2.57738	0.00995534	0.175539	GAS6-AS2	0.576189
100422821	1.38244	-1.0335	1.72928	-0.597648	0.550075		MIR1273C	-0.0625357
5552	2.46191	1.0333	1.5711	0.65769	0.510737		SRGN	0.0624334
116988	2398.34	-1.03287	0.205221	-5.03294	4.83021e-07	0.000153127	AGAP3	-0.853518
81492	4.48438	1.03265	1.08873	0.948485	0.342882		RSPH6A	0.15871
25927	397.063	1.03182	0.32776	3.14808	0.00164345	0.0568173	CNRIP1	0.683783
100130967	29.407	1.03181	0.693679	1.48745	0.136897	0.60103	C6orf99	0.318675
3827	12.4162	1.03171	0.881477	1.17043	0.241828	0.731184	KNG1	0.288887
10888	170.881	1.03157	0.559811	1.84271	0.0653718	0.450339	GPR83	0.489076
2823	310.542	-1.03151	0.394479	-2.61486	0.00892646	0.165009	GPM6A	-0.560788
49	2.97616	-1.03117	1.33596	-0.771861	0.440197		ACR	-0.0733793
3624	81.7294	1.03116	0.691151	1.49195	0.135712	0.598295	INHBA	0.259227
55966	489.86	1.03089	0.238686	4.31904	1.56707e-05	0.00221259	AJAP1	0.816546
338398	3.45201	1.03085	1.32296	0.779198	0.435863		TAS2R60	0.0946688
140894	3.9046	-1.03052	1.19502	-0.86235	0.388495		CNBD2	-0.154816
653333	495.13	1.03043	0.293498	3.51087	0.000446637	0.0252965	FAM86B1	0.733884
170425	78.2668	1.03036	0.341211	3.01971	0.0025302	0.0738063	LINC00858	0.672911
3587	11.8278	-1.03002	0.74013	-1.39167	0.164022	0.645701	IL10RA	-0.25207
140	2.30796	-1.02988	1.46684	-0.702109	0.482611		ADORA3	-0.0910191
377007	1.37938	-1.02984	1.70961	-0.60238	0.546921		KLHL30	-0.0648488
619207	12.998	-1.02954	0.819296	-1.25661	0.208895	0.700989	RP11-108K14.4	-0.295874
1749	1.41044	1.02937	2.06909	0.497498	0.618838		DLX5	0.0430907
4160	2.61188	-1.02921	1.63982	-0.627633	0.530244		MC4R	-0.0799842
23629	2.02876	1.02819	1.5525	0.662284	0.507789		BRD7P3	0.0957633
50839	3.44971	-1.02764	1.33676	-0.768755	0.442039		TAS2R10	-0.100537
60482	43.8329	1.02703	0.531203	1.93341	0.053186	0.410857	SLC5A7	0.464885
79785	4.25606	1.02667	1.43631	0.714799	0.474733		RERGL	0.111331
133060	5.43329	1.02628	0.934232	1.09852	0.271975		OTOP1	0.21033
25794	18.8095	1.02624	0.558143	1.83866	0.0659647	0.452906	FSCN2	0.405597
79782	2.64328	1.02525	1.65916	0.617932	0.53662		LRRC31	0.0128055
10878	78.3528	-1.02504	0.416938	-2.4585	0.0139517	0.209806	CFHR3	-0.585809
929	3.7462	1.02434	1.37792	0.743393	0.457244		CD14	0.0897593
161502	4.24429	1.02394	1.22101	0.838598	0.401695		C15orf26	0.0827973
9573	2028.3	1.02259	0.360686	2.83514	0.00458061	0.108215	GDF3	0.646819
140686	8.77275	1.02245	0.808029	1.26537	0.20574		WFDC3	0.257208
8722	68.4555	1.02242	0.488686	2.09218	0.0364228	0.347483	CTSF	0.55566
59353	488.964	-1.02198	0.312832	-3.26687	0.00108743	0.0451138	TMEM35	-0.636783
3303	4976.6	-1.02179	0.570917	-1.78973	0.0734974	0.472794	HSPA1A	-0.307106
7069	1.47035	1.02132	1.69125	0.603881	0.545923		THRSP	0.0699404
1558	70.1982	-1.02122	0.410407	-2.48832	0.0128348	0.202298	CYP2C8	-0.562859
25833	136.939	1.02108	0.440797	2.31644	0.0205342	0.255947	POU2F3	0.537762
144453	5.25817	-1.02102	1.1388	-0.89657	0.369948		BEST3	-0.142684
9671	93.585	-1.02044	0.493503	-2.06774	0.0386641	0.35832	WSCD2	-0.419057
728882	18.0176	-1.0202	0.837352	-1.21836	0.223086	0.714241	FAM182A	-0.202233
56660	701.209	1.01961	0.328012	3.10845	0.00188074	0.0608868	KCNK12	0.669254
400941	1.88268	-1.01917	1.89614	-0.537497	0.590924		LINC00487	-0.0650781
124842	49.7842	-1.0186	0.535358	-1.90265	0.0570868	0.424601	TMEM132E	-0.455945
7439	167.974	1.01838	0.449707	2.26455	0.0235404	0.276013	BEST1	0.403351
3590	154.262	-1.01831	0.293015	-3.47528	0.000510312	0.0273938	IL11RA	-0.738718
1270	1.22542	-1.01815	1.95951	-0.519594	0.603346		CNTF	-0.0287377
10647	0.70193	-1.01787	3.08399	-0.33005	0.741362		SCGB1D2	-0.0272629
1601	464.179	-1.01785	0.252894	-4.02481	5.70208e-05	0.00577352	DAB2	-0.788116
151877	3.31833	1.01768	1.21692	0.836275	0.403		MAGI1-IT1	0.108746
1879	18.3336	-1.01759	0.665498	-1.52907	0.126247	0.584416	EBF1	-0.339893
238	19.7759	1.01733	0.701936	1.44932	0.147247	0.617724	ALK	0.306753
64090	14.2003	-1.01648	0.646816	-1.57151	0.116065	0.56559	GAL3ST2	-0.37619
693201	6.44404	1.01638	1.04694	0.970814	0.331641		MIR616	0.0877558
1237	20.5708	1.01635	0.706054	1.43947	0.150016	0.622057	CCR8	0.303299
50805	89.0855	-1.01598	0.368206	-2.75928	0.00579287	0.125105	IRX4	-0.58705
100506409	6.02487	-1.01575	1.1483	-0.884569	0.376389		ELOVL2-AS1	-0.103286
3090	11.8645	1.01571	0.934037	1.08744	0.276841	0.765766	HIC1	0.0595532
4222	3.01465	-1.01515	1.75306	-0.57907	0.562542		MEOX1	-0.0824777
6700	2.53346	1.01506	1.847	0.54957	0.582614		SPRR2A	0.0271594
57733	3.96341	-1.01446	1.44707	-0.701041	0.483277		GBA3	-0.102228
4654	1.04355	-1.0144	2.8307	-0.358355	0.720078		MYOD1	-0.0326084
2638	26.962	1.01395	0.638672	1.58759	0.11238	0.561894	GC	0.313789
51557	11.0852	-1.01392	0.832484	-1.21794	0.223245	0.714598	LGSN	-0.302763
51127	83.4174	1.01371	0.322669	3.14165	0.00168	0.0578428	TRIM17	0.679626
1674	86.0624	1.01365	0.329703	3.07444	0.00210899	0.0658347	DES	0.651374
150572	4.1263	-1.01362	1.35363	-0.748819	0.453966		SMYD1	-0.0453887
728577	435.802	1.01335	0.301458	3.36149	0.000775242	0.0357847	CNTNAP3B	0.673185
442916	1.22619	1.01314	2.6461	0.382881	0.701808		MIR371B	0.0431698
22918	6.77551	-1.01307	0.986079	-1.02737	0.304245		CD93	-0.267417
390077	12.3611	1.01304	0.834725	1.21363	0.22489	0.715389	OR52N2	0.22642
91894	47.332	-1.01299	0.396469	-2.55502	0.0106182	0.181492	HSPB2-C11orf52	-0.589533
340204	8.77545	-1.01267	1.05047	-0.964021	0.335035		CLPSL1	-0.117711
100506385	14.1712	-1.01256	0.713862	-1.41843	0.156065	0.632771	AP000330.8	-0.293714
57611	118.501	1.01254	0.53562	1.8904	0.0587041	0.429593	ISLR2	0.29487
100422990	0.206063	1.01242	3.14898	0.321508	0.747825		MIR3134	0.0234624
125115	0.206063	1.01242	3.14898	0.321508	0.747825		KRT40	0.0234624
160065	0.206063	1.01242	3.14898	0.321508	0.747825		PATE1	0.0234624
2833	0.206063	1.01242	3.14898	0.321508	0.747825		CXCR3	0.0234624
3456	0.206063	1.01242	3.14898	0.321508	0.747825		IFNB1	0.0234624
3821	0.206063	1.01242	3.14898	0.321508	0.747825		KLRC1	0.0234624
392364	0.206063	1.01242	3.14898	0.321508	0.747825		RP11-20P5.2	0.0234624
169044	320.611	-1.01211	0.213782	-4.73432	2.19786e-06	0.000484825	COL22A1	-0.833238
100422904	0.198257	1.01205	3.14893	0.321394	0.747912		MIR3193	0.0234624
100505659	0.198257	1.01205	3.14893	0.321394	0.747912		LINC00967	0.0234624
100505994	0.198257	1.01205	3.14893	0.321394	0.747912		LUCAT1	0.0234624
152405	0.198257	1.01205	3.14893	0.321394	0.747912		C3orf30	0.0234624
65121	0.198257	1.01205	3.14893	0.321394	0.747912		PRAMEF1	0.0234624
80316	0.198257	1.01205	3.14893	0.321394	0.747912		PPP1R2P9	0.0234624
257236	26.9304	1.01189	0.551562	1.83459	0.066567	0.454843	CCDC96	0.411929
8837	229.556	-1.01166	0.406961	-2.48588	0.012923	0.203028	CFLAR	-0.474882
100130275	0.20433	1.01153	3.14886	0.321238	0.74803		TFAP2A-AS1	0.0234624
100423030	0.20433	1.01153	3.14886	0.321238	0.74803		MIR3126	0.0234624
1269	0.20433	1.01153	3.14886	0.321238	0.74803		CNR2	0.0234624
137735	0.20433	1.01153	3.14886	0.321238	0.74803		ABRA	0.0234624
270	0.20433	1.01153	3.14886	0.321238	0.74803		AMPD1	0.0234624
339512	0.20433	1.01153	3.14886	0.321238	0.74803		C1orf110	0.0234624
3881	0.20433	1.01153	3.14886	0.321238	0.74803		KRT31	0.0234624
57624	0.20433	1.01153	3.14886	0.321238	0.74803		NYAP2	0.0234624
50801	12.4792	1.01152	0.698926	1.44725	0.147827	0.617994	KCNK4	0.341202
8074	41.65	-1.0114	0.44866	-2.25427	0.0241792	0.280075	FGF23	-0.495472
692076	6.61806	-1.01104	0.899146	-1.12445	0.260824		SNORD7	-0.18551
80740	3.84973	-1.01095	1.22404	-0.825911	0.408854		LY6G6C	-0.137912
401022	13.173	1.01073	0.87449	1.1558	0.247764	0.737132	HOXD-AS1	0.136495
2207	13.8717	-1.01062	0.647918	-1.5598	0.118807	0.571156	FCER1G	-0.329352
94234	6.80019	1.01013	1.10312	0.915698	0.359825		FOXQ1	0.126408
84226	76.0543	1.01009	0.349936	2.88649	0.00389566	0.0968267	C2orf16	0.631172
80000	112.787	-1.0097	0.701421	-1.43951	0.150006	0.622057	GREB1L	-0.443267
11126	13.8072	-1.00939	0.660914	-1.52726	0.126696	0.584416	CD160	-0.317412
392465	1.60326	-1.00928	1.63909	-0.61576	0.538053		GLOD5	-0.0602377
55124	130.691	-1.0089	0.550668	-1.83214	0.0669302	0.456396	PIWIL2	-0.290225
7042	85.722	-1.00874	0.35878	-2.81158	0.00492989	0.11378	TGFB2	-0.642866
677772	3.52008	1.00846	1.21095	0.832785	0.404966		SCARNA6	0.100682
146227	6.42451	-1.00826	0.935075	-1.07826	0.280917		BEAN1	-0.191987
25946	610.762	-1.00776	0.231022	-4.36217	1.28778e-05	0.0018815	ZNF385A	-0.792623
340198	7.54711	-1.00746	0.857153	-1.17536	0.239851		IFITM4P	-0.261464
284013	15.5655	-1.00746	0.768368	-1.31117	0.1898	0.68098	VMO1	-0.298506
1413	92.839	1.00733	0.50295	2.00284	0.0451947	0.384098	CRYBA4	0.354456
124857	20.3526	1.00701	0.84118	1.19714	0.231253	0.72139	WFIKKN2	0.240349
149773	7.14855	1.0067	0.870105	1.15699	0.247278		APCDD1L-AS1	0.237299
8744	148.257	-1.00625	0.482042	-2.08747	0.0368456	0.348626	TNFSF9	-0.537777
3270	335.302	-1.00612	0.436005	-2.30759	0.0210218	0.257667	HRC	-0.47723
3772	2.71712	-1.00611	1.3456	-0.747706	0.454637		KCNJ15	-0.138163
51224	0.914972	-1.00551	2.6175	-0.384147	0.70087		TCEB3B	-0.0132307
100302175	0.202838	1.00525	3.14797	0.319331	0.749475		MIR1207	0.0234624
100422824	0.202838	1.00525	3.14797	0.319331	0.749475		MIR3128	0.0234624
3158	0.202838	1.00525	3.14797	0.319331	0.749475		HMGCS2	0.0234624
386684	0.202838	1.00525	3.14797	0.319331	0.749475		KRTAP12-4	0.0234624
407011	0.202838	1.00525	3.14797	0.319331	0.749475		MIR23B	0.0234624
4100	0.202838	1.00525	3.14797	0.319331	0.749475		MAGEA1	0.0234624
54576	0.202838	1.00525	3.14797	0.319331	0.749475		UGT1A8	0.0234624
55267	0.202838	1.00525	3.14797	0.319331	0.749475		C22orf26	0.0234624
693159	0.202838	1.00525	3.14797	0.319331	0.749475		MIR574	0.0234624
8392	0.202838	1.00525	3.14797	0.319331	0.749475		OR3A3	0.0234624
100423024	9.61538	1.00497	0.975703	1.03	0.30301	0.783102	MIR1270-1	0.173068
100506558	0.208911	1.00473	3.1479	0.319174	0.749595		MATN2	0.0234624
3026	0.208911	1.00473	3.1479	0.319174	0.749595		HABP2	0.0234624
100506742	0.201105	1.00435	3.14785	0.319058	0.749682		CASP12	0.0234624
4158	0.201105	1.00435	3.14785	0.319058	0.749682		MC2R	0.0234624
4504	1.14433	1.00424	2.42563	0.414012	0.678865		MT3	0.0502294
254050	11.7761	1.00411	0.682322	1.47161	0.141127	0.609343	LRRC43	0.308827
100033451	0.184517	1.00376	3.14776	0.318883	0.749816		SNORD115-14	0.0234624
10881	0.184517	1.00376	3.14776	0.318883	0.749816		ACTL7A	0.0234624
132612	0.184517	1.00376	3.14776	0.318883	0.749816		ADAD1	0.0234624
165100	0.184517	1.00376	3.14776	0.318883	0.749816		C2orf57	0.0234624
26749	0.184517	1.00376	3.14776	0.318883	0.749816		GAGE2E	0.0234624
388646	0.184517	1.00376	3.14776	0.318883	0.749816		GBP7	0.0234624
406955	0.184517	1.00376	3.14776	0.318883	0.749816		MIR181B1	0.0234624
572558	0.184517	1.00376	3.14776	0.318883	0.749816		PGM5-AS1	0.0234624
642612	0.184517	1.00376	3.14776	0.318883	0.749816		TRIM49C	0.0234624
645051	0.184517	1.00376	3.14776	0.318883	0.749816		GAGE13	0.0234624
84651	0.184517	1.00376	3.14776	0.318883	0.749816		SPINK7	0.0234624
196993	24.9569	1.0034	0.525757	1.90849	0.0563278	0.420818	CT62	0.441457
10590	0.190591	1.00325	3.14769	0.318725	0.749935		SCGN	0.0234624
139760	0.190591	1.00325	3.14769	0.318725	0.749935		GPR119	0.0234624
7832	612.191	-1.00295	0.322095	-3.11385	0.00184665	0.0604823	BTG2	-0.638821
27004	2.11017	1.00293	1.63949	0.611731	0.540716		TCL6	0.0498659
120066	0.182785	1.00287	3.14764	0.318609	0.750023		OR5P3	0.0234624
120146	0.182785	1.00287	3.14764	0.318609	0.750023		TRIM64B	0.0234624
203413	0.182785	1.00287	3.14764	0.318609	0.750023		CT83	0.0234624
222894	0.182785	1.00287	3.14764	0.318609	0.750023		FERD3L	0.0234624
386680	0.182785	1.00287	3.14764	0.318609	0.750023		KRTAP10-5	0.0234624
56656	0.182785	1.00287	3.14764	0.318609	0.750023		OR2S2	0.0234624
574492	0.182785	1.00287	3.14764	0.318609	0.750023		MIR517C	0.0234624
671	0.182785	1.00287	3.14764	0.318609	0.750023		BPI	0.0234624
7104	0.182785	1.00287	3.14764	0.318609	0.750023		TM4SF4	0.0234624
2810	166.945	-1.00254	0.427107	-2.34728	0.0189111	0.244796	SFN	-0.539669
1107	1674.26	-1.00252	0.289643	-3.46122	0.000537734	0.0282344	CHD3	-0.709356
79962	10.0838	-1.00234	0.728451	-1.37598	0.168827	0.653452	DNAJC22	-0.270995
57705	0.387153	1.00229	3.12149	0.321093	0.74814		WDFY4	0.0233831
100286938	0.379348	1.00191	3.12144	0.320975	0.748229		VPS13A-AS1	0.0233831
2692	0.379348	1.00191	3.12144	0.320975	0.748229		GHRHR	0.0233831
163486	64.9523	-1.00165	0.339997	-2.94605	0.00321856	0.0851626	DENND1B	-0.642634
51554	33.1248	1.00144	0.577103	1.73529	0.0826898	0.498439	ACKR4	0.327792
3857	0.385421	1.00139	3.12137	0.320816	0.74835		KRT9	0.0233831
5225	3.74746	-1.00114	1.14425	-0.874932	0.381611		PGC	-0.14855
100128505	0.400646	1.00066	3.12123	0.320599	0.748515		RP11-264C15.2	0.0234624
171389	32.8846	1.00038	0.584152	1.71253	0.0867987	0.508054	NLRP6	0.455036
401027	2.77199	-0.999882	1.61139	-0.620509	0.534922		C2orf66	-0.112218
401285	5.0435	0.999457	1.06575	0.9378	0.348347		TCP10L2	0.111331
3762	4.84173	0.999347	1.18742	0.841613	0.400005		KCNJ5	0.0609889
91752	5.791	0.998379	1.00498	0.993436	0.320498		ZNF804A	0.15681
100129534	97.5572	0.998364	0.296302	3.36942	0.000753274	0.035157	RP4-740C4.6	0.706061
150696	259.531	-0.998109	0.376851	-2.64855	0.00808383	0.155941	PROM2	-0.50879
3908	2523.99	0.997943	0.609107	1.63837	0.101344	0.543639	LAMA2	0.429138
64321	0.943043	0.997237	2.95631	0.337325	0.735872		SOX17	0.0277132
84698	64.0899	-0.997073	0.426079	-2.34011	0.0192779	0.247546	CAPS2	-0.525902
221938	7.23897	0.996783	0.920763	1.08256	0.279003		MMD2	0.230523
5005	24.601	-0.996486	0.626857	-1.58966	0.111913	0.5617	ORM2	-0.287627
5654	2461.42	0.996086	0.159225	6.25585	3.95365e-10	4.14764e-07	HTRA1	0.890397
100302186	0.187365	0.996008	3.14668	0.316527	0.751603		MIR548I3	0.0234624
56269	0.187365	0.996008	3.14668	0.316527	0.751603		IRGC	0.0234624
642929	0.187365	0.996008	3.14668	0.316527	0.751603		RP11-327I22.6	0.0234624
693225	0.187365	0.996008	3.14668	0.316527	0.751603		MIR640	0.0234624
89883	0.187365	0.996008	3.14668	0.316527	0.751603		OR6W1P	0.0234624
28513	2.63754	-0.995639	1.78609	-0.557442	0.577226		CDH19	-0.11162
100507468	3.49436	-0.995206	1.30184	-0.764459	0.444594		RP5-942I16.1	-0.0518485
53836	16.3878	-0.994953	0.743363	-1.33845	0.18075	0.671152	GPR87	-0.319226
7348	37.8955	-0.994847	0.43625	-2.28045	0.0225808	0.269462	UPK1B	-0.542754
64211	37.7619	-0.994712	1.01004	-0.984828	0.324708	0.798208	LHX5	-0.316473
139599	4.76984	0.994674	1.59952	0.621859	0.534034		MAGEE2	-0.00599957
3381	1.37252	0.994199	2.00772	0.495188	0.620468		IBSP	0.0433773
6036	0.397421	0.993454	3.12025	0.31839	0.750189		RNASE2	0.0234624
158833	0.401512	0.993262	3.12027	0.318326	0.750238		AWAT1	0.0234624
414926	0.407585	0.992739	3.1202	0.318165	0.75036		LINC00593	0.0234624
283150	1.13214	-0.992492	2.82063	-0.351869	0.724936		FOXR1	-0.00929082
693187	0.385002	0.992299	3.1201	0.318035	0.750459		MIR602	0.0234624
51471	0.379101	0.991965	3.12003	0.317934	0.750535		NAT8	0.0234624
6570	0.391957	0.991948	3.12004	0.317928	0.75054		SLC18A1	0.0234624
152742	0.714944	-0.991862	2.85305	-0.34765	0.728103		LINC01085	-0.010864
391051	2.11252	0.991333	1.38836	0.714031	0.475208		UOX	0.0959958
390110	1.21434	-0.991037	2.10331	-0.471179	0.637513		ACCSL	-0.0504724
654433	2.54546	-0.99085	1.85201	-0.535014	0.59264		PAX8-AS1	-0.0916077
100507524	15.0194	-0.990501	0.664854	-1.4898	0.136276	0.599322	ARHGEF26-AS1	-0.295838
401431	95.7104	0.990413	0.372223	2.66081	0.00779539	0.152655	ATP6V0E2-AS1	0.591427
79937	2122.55	0.989967	0.244724	4.04524	5.22707e-05	0.00548907	CNTNAP3	0.740885
91662	561.171	0.98991	0.773457	1.27985	0.200597	0.692129	NLRP12	0.326327
2151	23.468	0.989796	0.729135	1.35749	0.174625	0.661997	F2RL2	0.169293
2306	4.65258	-0.989643	1.16665	-0.848275	0.396285		FOXD2	-0.126532
63827	421.471	-0.989254	0.334485	-2.95754	0.00310103	0.0830996	BCAN	-0.601323
731424	1.30401	-0.988813	2.16303	-0.457143	0.647568		RP11-701P16.5	-0.0545243
4255	309.686	-0.988585	0.416746	-2.37215	0.0176849	0.237904	MGMT	-0.379237
84267	4.80781	-0.988558	1.27435	-0.775736	0.437905		C9orf64	-0.0184471
11318	11.7432	-0.987471	0.744884	-1.32567	0.184949	0.674665	GPR182	-0.255918
145741	15.036	0.987135	0.720953	1.36921	0.170934	0.657089	C2CD4A	0.248595
26038	382.007	0.987047	0.292652	3.37276	0.000744185	0.0350246	CHD5	0.722684
80350	65.5898	0.986993	0.310229	3.1815	0.00146516	0.0526657	LPAL2	0.680853
28	19.0861	0.9855	0.656309	1.50158	0.133206	0.594298	ABO	0.365874
81578	342.966	-0.985119	0.194474	-5.06556	4.07198e-07	0.000143347	COL21A1	-0.833745
100124536	3.78493	-0.984946	1.20428	-0.81787	0.413431		SNORA38B	-0.125867
253935	2.27426	0.984828	1.48761	0.662021	0.507958		ANGPTL5	0.0593832
284680	7.99878	0.984135	0.914242	1.07645	0.281727		C1orf111	0.194304
440435	21.4041	0.984011	0.638148	1.54198	0.123078	0.579575	GPR179	0.308718
26796	5.60287	-0.983844	1.03249	-0.952883	0.340649		SNORD53	-0.212818
26998	47.9307	0.983746	0.722498	1.36159	0.173327	0.66028	FETUB	0.265571
100170841	188.636	-0.983376	0.269671	-3.64658	0.000265757	0.0173697	C17orf96	-0.724944
100506161	79.0752	0.983262	0.305011	3.22369	0.0012655	0.0489233	RP11-378J18.3	0.689878
874	241.003	0.983207	0.883806	1.11247	0.265936	0.75517	CBR3	0.251923
6327	33.3275	-0.983117	0.525003	-1.87259	0.0611245	0.4374	SCN2B	-0.483233
4833	8457.95	-0.982071	0.201258	-4.87965	1.06273e-06	0.000273123	NME4	-0.818837
284827	5.58006	-0.981474	1.29565	-0.757517	0.44874		KRTAP13-4	-0.18359
160419	1.57037	-0.981463	1.97131	-0.497873	0.618574		C12orf50	-0.0455428
116449	1.8842	-0.981407	2.15796	-0.454785	0.649264		CLNK	0.0117536
403314	0.80725	0.981383	3.06901	0.319772	0.749141		APOBEC4	0.017202
554313	258.913	0.981328	0.420443	2.33403	0.0195939	0.250165	HIST2H4A	0.515553
6999	3.63548	-0.980908	1.20286	-0.815481	0.414797		TDO2	-0.162048
100126332	0.595924	0.980712	3.01668	0.325096	0.745108		NELFA	0.020094
7287	151.156	0.980311	0.377549	2.59651	0.00941762	0.170328	TULP1	0.563174
406974	4.99053	0.980292	1.06618	0.919445	0.357863		MIR197	0.124233
7161	180.557	-0.980012	0.271535	-3.60916	0.000307194	0.019404	TP73	-0.720168
7681	0.601997	0.979979	3.0067	0.325932	0.744476		MKRN3	0.0206301
100287314	313.534	0.97948	0.245858	3.98393	6.77862e-05	0.00658349	LINC00941	0.76665
429	17.7723	0.978925	0.753697	1.29883	0.194002	0.68537	ASCL1	0.358802
6422	43229.5	-0.978601	0.377563	-2.59189	0.0095451	0.17197	SFRP1	-0.465891
170589	30.2042	-0.978252	0.511983	-1.91071	0.0560417	0.419836	GPHA2	-0.418874
116448	18.168	-0.978083	0.842834	-1.16047	0.245858	0.735045	OLIG1	-0.325727
1414	236.522	0.977888	0.345678	2.8289	0.00467087	0.109456	CRYBB1	0.563016
148109	1.50329	-0.977751	1.86835	-0.523322	0.60075		FAM187B	-0.0175938
205147	34.645	0.977509	0.542191	1.80289	0.071406	0.466658	AMER3	0.394774
728464	13.8975	-0.977096	0.812719	-1.20225	0.229265	0.719454	METTL24	-0.183182
440253	55.6297	-0.976699	0.53228	-1.83493	0.0665154	0.454676	WHAMMP2	-0.319383
120787	0.676323	-0.975777	3.09699	-0.315073	0.752706		OR52W1	-0.0281478
3552	49.4726	-0.975586	0.469526	-2.07781	0.0377267	0.353519	IL1A	-0.507658
3294	1.17819	-0.975458	2.14107	-0.455594	0.648682		HSD17B2	-0.0486582
57057	5.27279	-0.97541	1.14768	-0.849895	0.395383		TBX20	-0.057902
5197	4.14114	0.975213	1.67742	0.581377	0.560986		PF4V1	0.160331
8370	261.261	0.974527	0.41482	2.34927	0.01881	0.244796	HIST2H4A	0.519013
960	1336.52	0.974472	0.26098	3.73389	0.000188543	0.0139555	CD44	0.727157
100507500	1.69865	0.974233	1.94746	0.500258	0.616893		EGFR-AS1	0.0310015
114571	3.37696	0.974225	1.38334	0.704254	0.481275		SLC22A9	0.144952
486	25.5429	-0.973617	0.608176	-1.60088	0.109403	0.558044	FXYD2	-0.325071
2044	9.53662	-0.973267	0.787479	-1.23593	0.216485	0.7098	EPHA5	-0.245346
100506737	4.88169	-0.972625	1.11521	-0.872144	0.38313		CTA-941F9.9	-0.122644
339529	2.03799	0.971841	1.4979	0.648802	0.516467		RP11-278H7.1	0.0778351
285972	3.56958	0.971664	1.40479	0.691678	0.48914		LINC00996	0.113474
80157	3.52447	0.971315	1.31532	0.738462	0.460234		CWH43	0.171346
140564	500.363	-0.970985	0.247804	-3.91836	8.91544e-05	0.00792578	APOBEC3D	-0.743138
57556	92990.6	0.97089	0.252466	3.84563	0.000120244	0.0101017	SEMA6A	0.744128
133482	23.0954	-0.970837	0.724177	-1.34061	0.180048	0.671152	SLCO6A1	-0.230646
4107	3.17015	-0.970718	1.15895	-0.83758	0.402266		MAGEA8	-0.132874
3273	7.41206	0.970499	0.91972	1.05521	0.291329		HRG	0.185746
200403	1.4363	0.969563	1.97992	0.489699	0.624347		VWA3B	0.0440376
9022	6.74698	0.968896	0.947836	1.02222	0.306678		CLIC3	0.209195
89870	19.9293	-0.96866	0.609383	-1.58957	0.111931	0.5617	TRIM15	-0.325415
8092	73.5586	-0.968375	0.361362	-2.67979	0.00736679	0.147509	ALX1	-0.565668
729627	1.30476	-0.968071	2.33478	-0.41463	0.678413		PRR23A	-0.0118774
23098	613.128	0.967758	0.297544	3.25249	0.00114399	0.0464284	SARM1	0.646194
100507194	67.2685	-0.967182	0.414185	-2.33514	0.019536	0.249615	RP1-40E16.9	-0.542216
2248	1.57642	0.967045	2.05561	0.470441	0.63804		FGF3	0.0346353
100313886	1.49159	-0.965781	1.82978	-0.527812	0.59763		MIR2116	-0.0208754
149461	760.284	-0.965447	0.241708	-3.99426	6.48957e-05	0.00637647	CLDN19	-0.762393
57535	331.003	0.965387	0.231305	4.17366	2.99741e-05	0.00354666	KIAA1324	0.786766
8320	15.3868	-0.96537	0.733663	-1.31582	0.188234	0.678838	EOMES	-0.270383
3350	64.7514	-0.965019	0.848884	-1.13681	0.255618	0.744092	HTR1A	-0.146534
135886	1.1766	-0.964692	2.1651	-0.445565	0.655911		WBSCR28	-0.0442036
84066	2.91889	0.964524	1.54957	0.622448	0.533647		TEX35	0.0382141
132203	5.65343	0.963921	1.04575	0.921751	0.356659		SNTN	0.124147
22876	10371.6	-0.963796	0.205717	-4.68506	2.79872e-06	0.0005878	INPP5F	-0.798335
388428	5.65252	0.96369	0.935518	1.03011	0.302957		AATK-AS1	0.182957
151888	7.32695	0.963306	0.924971	1.04144	0.297669		BTLA	0.22617
55503	204.267	-0.963112	0.397391	-2.42359	0.0153681	0.220697	TRPV6	-0.672515
574032	0.970805	-0.962878	3.10438	-0.310167	0.756434		MIR20B	-0.0393309
1545	914.648	0.962127	0.269185	3.57422	0.000351277	0.0215407	CYP1B1	0.683645
100506755	13.9253	-0.961808	0.710976	-1.3528	0.17612	0.663787	MIR497HG	-0.251144
768216	1.02395	-0.961751	2.93441	-0.32775	0.743101		MIR454	0.000316574
85445	4.0802	0.961601	1.17193	0.820529	0.411915		CNTNAP4	0.0927616
152098	24.9037	-0.961578	0.624179	-1.54055	0.123427	0.580026	ZCWPW2	-0.284615
57575	1762.8	0.961261	0.25758	3.73189	0.000190046	0.0140051	PCDH10	0.696028
2904	124.143	0.96004	0.315017	3.04758	0.00230694	0.0696323	GRIN2B	0.671749
729025	3.16242	-0.960009	1.43685	-0.668133	0.504049		SLC15A5	-0.115312
150142	1.61599	-0.95999	1.94382	-0.493867	0.6214		ZNF295-AS1	-0.0224107
7379	16.8186	0.959933	0.577187	1.66312	0.0962877	0.53056	UPK2	0.371889
389941	315.735	0.959216	0.216345	4.43374	9.26136e-06	0.00146135	C1QL3	0.787881
8608	26.1828	-0.959204	0.657113	-1.45972	0.144366	0.613775	RDH16	-0.301547
80830	109.668	0.958321	0.346758	2.76366	0.00571568	0.124518	APOL6	0.622269
117245	1671.35	0.957691	0.711678	1.34568	0.178406	0.668504	HRASLS5	0.369232
8292	82.6646	-0.956394	0.388909	-2.45917	0.0139257	0.20966	COLQ	-0.583331
6017	2.14155	-0.956266	1.50149	-0.636879	0.524204		RLBP1	-0.0680033
2979	103.038	-0.955864	0.474719	-2.01354	0.0440584	0.379677	GUCA1B	-0.501705
390443	7.98269	0.955688	1.09948	0.869216	0.384729		RNASE9	0.213815
166929	48.8235	0.955447	0.510431	1.87184	0.0612281	0.437954	SGMS2	0.454467
815	10.3824	-0.955195	0.798329	-1.19649	0.231504	0.72139	CAMK2A	-0.202859
57468	34.7463	-0.954905	0.613066	-1.55759	0.119331	0.571875	SLC12A5	-0.306478
201191	129.031	-0.953294	0.291507	-3.27022	0.00107464	0.0449459	SAMD14	-0.687174
8366	2.36743	-0.952662	1.39741	-0.681736	0.495406		HIST2H4A	-0.0981262
4761	1.35742	-0.952223	2.08226	-0.457303	0.647453		NEUROD2	-0.0431928
8900	235.479	0.952178	0.413683	2.30171	0.0213516	0.260334	CCNA1	0.573796
83650	4.31366	0.951969	1.14037	0.834793	0.403834		SLC35G5	0.107917
2357	0.81834	0.951101	3.08151	0.308648	0.757589		FPR1	0.0342197
6580	21.1217	0.950952	0.533722	1.78174	0.0747921	0.47475	SLC22A1	0.408901
100132074	75.4005	-0.950597	0.320593	-2.96512	0.00302567	0.0822611	FOXO6	-0.639271
81551	13.7475	0.95058	0.784644	1.21148	0.225712	0.715389	STMN4	0.273507
133022	183.147	-0.950486	1.16196	-0.818005	0.413355	0.846506	TRAM1L1	-0.070921
1645	80.4382	-0.950224	0.308967	-3.07549	0.00210157	0.0658347	AKR1C1	-0.661117
100271715	65.9168	0.949558	0.372323	2.55036	0.0107611	0.18345	ARHGEF33	0.574353
864	66.0063	-0.949239	0.33733	-2.81398	0.00489323	0.113089	RUNX3	-0.616647
284551	1.02838	0.948894	3.0773	0.308352	0.757814		RP11-439L8.4	0.00160714
55638	67.7223	0.948692	0.327521	2.89658	0.00377255	0.0946064	SYBU	0.636959
729956	203.12	0.94807	0.395185	2.39905	0.0164376	0.229009	SHISA7	0.589945
54777	15.277	-0.946839	0.64505	-1.46785	0.142144	0.610364	TTC40	-0.331306
399947	219.978	0.946561	0.372017	2.54441	0.0109464	0.185169	C11orf87	0.54278
431707	25.3104	-0.946336	0.725365	-1.30463	0.192017	0.682809	LHX8	-0.348773
2702	338.867	-0.946245	0.386211	-2.45007	0.0142827	0.211712	GJA5	-0.48681
390664	2.119	0.946056	1.8313	0.516604	0.605433		C1QTNF8	0.0386221
4852	53.3012	0.945826	0.546744	1.72993	0.0836436	0.500628	NPY	0.339084
718	290.553	-0.945582	0.768789	-1.22996	0.218711	0.712491	C3	-0.217534
10814	67.4246	0.945222	0.409306	2.30933	0.0209252	0.257667	CPLX2	0.479626
339929	38.1778	0.9446	0.429338	2.20013	0.0277975	0.30083	LPP-AS2	0.4951
100133985	56.5249	0.944171	0.361453	2.61216	0.0089973	0.16576	AC016700.5	0.579454
100505635	21.3325	0.943937	0.556751	1.69544	0.0899923	0.515566	RP11-61I13.3	0.387048
353332	1.84515	0.943888	1.84088	0.512736	0.608136		KRTAP12-1	0.038713
5239	4.74624	0.943686	1.17609	0.802391	0.422327		PGM5	0.122958
7805	48.8065	-0.943488	0.545952	-1.72815	0.0839607	0.500628	LAPTM5	-0.503329
3792	60.9939	-0.943298	0.389611	-2.42113	0.0154724	0.221892	KEL	-0.55423
170691	237.161	0.942529	0.207399	4.54452	5.50598e-06	0.000994746	ADAMTS17	0.784975
100506374	4.39024	0.942334	1.1513	0.818497	0.413073		AC006116.20	0.0752862
100306975	3.20987	0.942329	1.29621	0.726988	0.467233		NDUFAF4P1	0.0525422
27245	1414.55	-0.940847	0.192884	-4.87778	1.07286e-06	0.000273123	AHDC1	-0.795819
574031	28.4353	-0.940846	0.585352	-1.60732	0.107985	0.556382	MIR363	-0.351099
4774	99.5023	-0.939915	0.392943	-2.39199	0.0167575	0.231355	NFIA	-0.522825
646424	2.53374	0.93964	1.45347	0.646479	0.517969		SPINK8	0.0457924
1826	61.1468	0.939553	0.438297	2.14364	0.0320614	0.323358	DSCAM	0.542953
64651	398.942	-0.939529	0.170487	-5.51085	3.57099e-08	1.93548e-05	CSRNP1	-0.827876
54207	431.875	0.939274	0.243281	3.86086	0.000112987	0.00968574	KCNK10	0.728541
83643	361.112	0.938825	0.394301	2.38099	0.0172663	0.235669	CCDC3	0.58221
763	0.787524	0.937956	3.09232	0.303318	0.761648		CA5A	-0.000751089
11221	124.888	0.93752	0.460701	2.03499	0.0418523	0.370888	DUSP10	0.491588
254528	225.305	0.936801	0.426987	2.19398	0.0282366	0.303539	MEIOB	0.535049
5172	12.798	-0.936756	0.672385	-1.39318	0.163564	0.645269	SLC26A4	-0.291078
730	3.67674	-0.936604	1.30877	-0.715638	0.474215		C7	-0.0802069
84623	36.7323	-0.936475	0.6247	-1.49908	0.133853	0.595089	KIRREL3	-0.290121
2829	0.711168	0.936161	3.08365	0.303589	0.761441		XCR1	0.0279817
93655	0.711168	0.936161	3.08365	0.303589	0.761441		ST7	0.0279817
9543	4548.36	-0.935785	0.309951	-3.01913	0.00253499	0.0738178	IGDCC3	-0.639196
7018	14.8489	0.935322	0.889503	1.05151	0.293024	0.777615	TF	0.018381
399949	0.922661	0.93525	2.64097	0.354132	0.72324		C11orf88	0.00677742
3777	44.4271	0.935102	0.431675	2.16621	0.0302948	0.3151	KCNK3	0.500086
145873	22.6771	-0.934641	0.623574	-1.49884	0.133914	0.595089	MESP2	-0.282062
5308	23.0478	-0.934512	0.740049	-1.26277	0.206672	0.69827	PITX2	-0.338487
26052	624.822	0.934366	0.754632	1.23817	0.215651	0.708664	DNM3	0.208143
3782	185.069	-0.934357	0.277171	-3.37105	0.000748834	0.0350471	KCNN3	-0.665615
6023	27.6994	-0.934225	0.518385	-1.80219	0.0715162	0.467191	RMRP	-0.390684
3117	23.303	0.934151	0.699894	1.3347	0.181974	0.67173	HLA-DQA1	0.344255
391723	4.99017	-0.933613	1.09791	-0.850352	0.395129		HELT	-0.116282
51294	54.0267	-0.933186	0.470695	-1.98257	0.0474152	0.390439	PCDH12	-0.491771
244	7.00215	-0.93228	1.09925	-0.848105	0.39638		ANXA8L2	-0.0640167
10581	4971.28	-0.932242	0.250355	-3.72367	0.000196347	0.0143435	IFITM2	-0.742584
4993	0.793897	-0.931738	3.07567	-0.302938	0.761937		OR2C1	-0.0151447
100506999	0.599035	0.931461	3.10786	0.299712	0.764397		RP11-1070N10.4	0.0203798
23650	7.25074	-0.931314	0.852292	-1.09272	0.274518		TRIM29	-0.186584
5620	0.402771	-0.931233	3.12834	-0.297676	0.76595		PRM2	-0.0252912
100302204	0.667615	0.930986	3.08433	0.301843	0.762771		MIR548I1	0.0267809
9935	316.616	0.930092	0.307965	3.02012	0.00252671	0.0738063	MAFB	0.66348
5362	302.743	-0.930017	0.261779	-3.55268	0.000381332	0.0226999	PLXNA2	-0.709973
11343	52.4502	0.929337	0.629507	1.47629	0.139866	0.607195	MGLL	0.265561
6424	7.93073	0.929033	0.857411	1.08353	0.278572		SFRP4	0.198221
375387	585.767	0.928919	0.192413	4.82774	1.38091e-06	0.000336261	NRROS	0.78927
4589	0.537285	-0.928636	3.11282	-0.298326	0.765454		MUC7	-0.0365635
63948	24.5063	0.928496	0.823718	1.1272	0.259658	0.749102	DMRTB1	0.231763
317772	2.57547	-0.927882	1.42417	-0.651524	0.514708		HIST2H2AB	-0.0714842
89765	23.5114	0.927713	0.552968	1.6777	0.0934062	0.523934	RSPH1	0.356038
154467	196.752	-0.927449	0.25454	-3.64363	0.000268821	0.0174391	CCDC167	-0.706597
51301	1315.26	0.926636	0.876117	1.05766	0.29021	0.776051	GCNT4	0.257832
976	376.894	0.926634	0.28773	3.22049	0.0012797	0.0490903	CD97	0.662374
5077	18.8367	0.926587	0.619025	1.49685	0.134433	0.595346	PAX3	0.331192
59277	319.545	0.926559	0.303097	3.05697	0.00223587	0.0681798	NTN4	0.667678
63027	6092.2	0.9263	0.183043	5.06055	4.18044e-07	0.000143347	SLC22A23	0.801489
1258	1.2604	-0.926232	2.13101	-0.434645	0.66382		CNGB1	-0.0347064
400258	0.405056	-0.926206	3.12852	-0.296052	0.76719		C14orf180	-0.0252912
284615	32.4532	0.926122	0.482231	1.92049	0.0547954	0.415841	ANKRD34A	0.437674
8468	12.3109	-0.926072	0.741769	-1.24846	0.211861	0.704752	FKBP6	-0.228965
64582	48.3237	0.925665	0.364916	2.53666	0.0111917	0.18655	GPR135	0.57859
376412	4.47167	0.925097	1.11153	0.832275	0.405254		RNF126P1	0.124997
79986	401.411	-0.925089	0.287043	-3.22282	0.00126933	0.0489233	ZNF702P	-0.663574
774	1661.83	0.924994	0.176024	5.25492	1.48085e-07	6.0686e-05	CACNA1B	0.802853
6656	11.8481	-0.924919	0.870671	-1.06231	0.288097	0.775365	SOX1	-0.181926
353091	7.85684	0.92458	0.884147	1.04573	0.295685		RAET1G	0.174303
161253	70.7197	-0.924229	0.333766	-2.76909	0.00562123	0.123139	REM2	-0.611844
1395	30.6257	0.92415	0.463746	1.99279	0.0462839	0.387178	CRHR2	0.46333
259292	2.99639	0.923936	1.48801	0.620922	0.534651		TAS2R46	0.051452
54101	358.937	-0.923907	0.218656	-4.2254	2.38519e-05	0.00299074	RIPK4	-0.756321
644623	146.597	0.923586	0.328964	2.80756	0.0049918	0.11458	TPTE2P2	0.622865
283738	1.61038	0.922563	2.19553	0.420201	0.674338		NTRK3-AS1	0.0481186
2779	8.00928	-0.922558	0.941524	-0.979855	0.327158		GNAT1	-0.101942
4493	388.725	0.922265	0.945871	0.975044	0.329539	0.800594	MT1E	0.220272
200172	8.24864	0.922133	0.819965	1.1246	0.260759		SLFNL1	0.223283
100302263	6.45945	-0.922102	0.932821	-0.988509	0.322904		MIR1908	-0.18996
29930	13.6807	0.921814	0.781285	1.17987	0.238052	0.726334	PCDHB1	0.149186
343578	46.0631	-0.921569	0.672898	-1.36955	0.170827	0.657089	ARHGAP40	-0.153802
440730	3.05644	0.921175	1.23835	0.743875	0.456952		TRIM67	0.126713
442898	12.1454	-0.920909	0.660843	-1.39354	0.163458	0.645153	MIR324	-0.303488
53335	1509.03	-0.920506	0.250322	-3.67729	0.000235728	0.0161004	BCL11A	-0.695333
10941	2.29383	-0.920055	1.65376	-0.556343	0.577976		UGT2A1	-0.109571
100498859	0.503394	-0.919822	3.11122	-0.295647	0.7675		LINC00881	-0.0128452
162333	38.545	0.919686	0.532312	1.72772	0.0840387	0.500628	MARCH10	0.406404
286753	1.37199	0.919351	2.12577	0.43248	0.665393		TUSC5	0.0215808
117157	0.545553	-0.919292	3.11134	-0.295465	0.767639		SH2D1B	-0.037122
26683	0.487955	-0.919104	3.11578	-0.294984	0.768006		OR4F29	-0.0345807
503582	7.85925	0.918622	0.807493	1.13762	0.255278		ARGFX	0.234184
54742	0.850751	-0.918388	3.0685	-0.299296	0.764715		LY6K	-0.0111862
51716	6.50311	-0.918049	1.53633	-0.597559	0.550134		CES1P1	-0.0593744
8499	110.041	0.917811	0.284788	3.22278	0.00126953	0.0489233	PPFIA2	0.655794
2066	46.2351	-0.91733	0.633017	-1.44914	0.147298	0.617724	ERBB4	-0.300564
5791	131.463	-0.917246	0.313452	-2.92627	0.00343051	0.0894923	PTPRE	-0.627056
223075	92.5157	0.916372	0.649221	1.41149	0.158099	0.636785	CCDC129	0.306408
728712	0.508304	-0.916328	3.11563	-0.294107	0.768676		SPANXA1	-0.035702
339184	130.652	-0.91565	0.990385	-0.924539	0.355206	0.819307	CCDC144NL	0.077108
1846	1183.59	0.915626	0.304977	3.00228	0.00267964	0.0755426	DUSP4	0.677929
285735	0.541866	-0.915537	3.1146	-0.29395	0.768796		LINC00326	-0.0368519
390191	0.541866	-0.915537	3.1146	-0.29395	0.768796		OR5B12	-0.0368519
653423	0.395397	-0.915418	3.12684	-0.292762	0.769704		SPAG11B	-0.0252912
55304	41.5759	-0.915172	0.50412	-1.81538	0.0694649	0.462918	SPTLC3	-0.418108
57091	8.41387	-0.914899	0.885337	-1.03339	0.301421		CASS4	-0.18345
93978	20.406	0.914535	0.860327	1.06301	0.287778	0.775365	CLEC6A	0.270314
158798	12.0242	-0.914455	0.743577	-1.2298	0.21877	0.712491	AKAP14	-0.243019
383	15.6899	0.914419	0.653376	1.39953	0.161655	0.643325	ARG1	0.317473
5016	165.619	-0.913948	0.508152	-1.79857	0.0720865	0.469456	OVGP1	-0.383906
57379	6.42588	0.913649	1.22862	0.743636	0.457097		AICDA	0.117267
131096	274.206	-0.913279	0.204117	-4.47429	7.66647e-06	0.00127713	KCNH8	-0.760021
83259	1100.33	0.913013	0.335196	2.72382	0.00645323	0.13486	PCDH11Y	0.546867
57126	207.157	0.912914	0.31682	2.88149	0.00395794	0.0978406	CD177	0.62859
138255	1123.08	0.912873	0.620576	1.47101	0.141288	0.609343	C9orf135	0.30307
406988	12.2579	0.912466	0.841058	1.0849	0.277965	0.765958	MIR205HG	0.277246
2982	0.708081	0.912281	3.0808	0.296119	0.767139		GUCY1A3	0.0278327
150	710.148	0.912044	0.254711	3.58071	0.000342664	0.0210895	ADRA2A	0.657643
256394	20.4711	-0.911619	0.683287	-1.33417	0.182149	0.67173	SERPINA11	-0.248812
81029	119.446	-0.911545	0.412227	-2.21127	0.0270171	0.297277	WNT5B	-0.53867
9881	2122.22	0.911458	0.15791	5.77201	7.83329e-09	5.48395e-06	TRANK1	0.816852
100131733	0.889265	-0.911409	2.39717	-0.380202	0.703795		USP30-AS1	-0.0354364
444882	8.87681	0.911382	0.8344	1.09226	0.274719		IGFL4	0.178496
170825	1.40736	0.911237	2.07566	0.43901	0.660654		GSX2	0.0565271
5407	13.4349	-0.910884	1.18784	-0.766837	0.443178	0.862637	PNLIPRP1	-0.037492
389658	52.4555	-0.910162	0.442423	-2.05722	0.0396649	0.363196	FAM150A	-0.460106
10077	10.9493	0.909746	0.696902	1.30542	0.191751	0.682809	TSPAN32	0.284637
4688	7.38571	-0.9097	1.28806	-0.706254	0.48003		NCF2	-0.0504911
1285	145.868	0.90966	0.342446	2.65636	0.00789886	0.153964	COL4A3	0.59914
100506195	4.66463	0.909318	1.07354	0.847027	0.39698		LARGE-AS1	0.13012
64067	66.2809	-0.909278	0.599563	-1.51657	0.129376	0.5883	NPAS3	-0.222412
83694	618.726	0.908936	0.182861	4.97063	6.67372e-07	0.000192784	RPS6KL1	0.784756
84265	252.655	-0.908462	0.356385	-2.54911	0.0107999	0.18385	POLR3GL	-0.524437
63036	1.88654	-0.908297	2.30188	-0.39459	0.693146		CELA2A	-0.0285074
375759	2.07659	0.908233	1.78122	0.509894	0.610125		C9orf50	0.0428137
25806	0.680169	0.908199	3.08959	0.293955	0.768792		VAX2	0.00671758
100126693	0.489984	-0.907375	3.11611	-0.291189	0.770907		LINC00322	-0.0370993
6913	106.596	-0.907102	0.49051	-1.8493	0.0644139	0.446937	TBX15	-0.346381
[truncated: 20,422 more rows]
